# Supplementary material
Source: publisher figshare collection journal article supplement (https://gsapubs.figshare.com/ndownloader/files/23304911)
Supplement: Supplementary file 1 [file 23304911]

## Sheet: Site ages Table
Hodges, M.S., González-León, C.M., Stanley, G.D., Jr., and Hodges, C.L., 2017, Detrital zircon U-Pb geochronology of the Sierra de Santa Rosa Formation, Sonora, Mexico, and implications for an Early Jurassic retroarc basin: Lithosphere, doi:10.1130/L633.1.
GSA Data Repository Item 2017235
Table DR1: LA-MC-ICPMS U-PB ZIRCON DATA FOR SIERRA DE SANTA ROSA
		Isotope ratios										Apparent ages (Ma)
Analysis	U	206Pb	Th/U	206Pb*	±	207Pb*	±	206Pb*	±	error	Concord.	206Pb*	±	207Pb*	±	206Pb*	±	Best age	±with OD
Site # - Spot #	(ppm)	204Pb		207Pb*	(%)	235U*	(%)	238U	(%)	corr.		238U*	(Ma)	235U	(Ma)	207Pb*	(Ma)	(Ma)	(Ma)
SR1-Spot 75	59.6498	27111.9	1.22688	19.1858	2.71998	0.210167	4.17751	0.0292444	3.17069	0.75899	0.959343	185.818	5.80759	193.693	7.36671	290.737	62.1567	185.818	3.48456
SR1-Spot 22	107.925	36236.9	0.842717	19.9199	1.63997	0.202433	5.04314	0.029246	4.76905	0.945649	0.992761	185.828	8.7357	187.183	8.62108	204.291	38.0563	185.828	5.24142
SR1-Spot 63	141.875	17427.8	0.495989	19.7971	1.61493	0.204307	3.96101	0.0293349	3.61685	0.913113	0.987393	186.384	6.64472	188.764	6.82321	218.637	37.3777	186.384	3.98683
SR1-Spot 26	139.736	59232.6	1.35542	19.6346	1.76252	0.207088	4.0331	0.0294901	3.62759	0.899454	0.980379	187.356	6.69869	191.106	7.02572	237.68	40.6534	187.356	4.01922
SR1-Spot 60	216.95	127475	0.860116	19.6462	1.66609	0.207574	3.71517	0.0295768	3.32064	0.893805	0.98112	187.899	6.1494	191.515	6.48446	236.303	38.4258	187.899	3.68964
SR1-Spot 181	237.839	138388	1.47307	19.8011	1.45148	0.20869	4.01087	0.0299701	3.73902	0.932222	0.989135	190.361	7.0136	192.452	7.03172	218.189	33.6192	190.361	4.20816
SR1-Spot 153	94.0287	13453.7	1.30145	19.8427	1.53236	0.209198	4.37342	0.0301063	4.09617	0.936607	0.991362	191.214	7.71743	192.88	7.6828	213.338	35.5002	191.214	4.63046
SR1-Spot 3	130.266	552680	0.391391	19.8644	1.77676	0.209205	3.9195	0.0301403	3.49365	0.891351	0.992435	191.426	6.58945	192.885	6.88556	210.768	41.2043	191.426	3.95367
SR1-Spot 276	284.589	22243.2	0.599254	19.802	1.77768	0.21002	3.68864	0.0301625	3.23201	0.876207	0.989648	191.565	6.10033	193.569	6.50084	218.093	41.1494	191.565	3.6602
SR1-Spot 265	159.913	69144.6	0.434778	19.3957	1.77085	0.215718	4.4437	0.0303452	4.0756	0.917165	0.971608	192.708	7.7378	198.34	8.00639	265.873	40.6476	192.708	4.64268
SR1-Spot 56	322.462	53787.3	0.744053	19.7062	1.46906	0.212734	3.85723	0.0304046	3.56653	0.924634	0.985885	193.08	6.78415	195.844	6.87043	229.259	33.9203	193.08	4.07049
SR1-Spot 17	198.803	43155.3	0.333169	17.675	1.47869	0.237261	3.40139	0.0304146	3.06316	0.90056	0.893457	193.143	5.82852	216.175	6.62304	475.075	32.7248	193.143	3.49711
SR1-Spot 182	379.39	76038.1	0.222697	19.6528	1.24878	0.21361	3.06978	0.030447	2.8043	0.913518	0.983556	193.345	5.34148	196.578	5.48636	235.574	28.8203	193.345	3.20489
SR1-Spot 221	165.542	26045.8	1.67766	19.657	1.88691	0.213742	4.1302	0.0304725	3.67398	0.88954	0.983813	193.505	7.00368	196.688	7.38539	235.073	43.5429	193.505	4.20221
SR1-Spot 286	853.625	80942.4	0.412484	19.5536	1.12748	0.215053	3.23798	0.030498	3.03534	0.937418	0.97917	193.664	5.79095	197.784	5.81914	247.209	25.9599	193.664	3.47457
SR1-Spot 250	156.59	81660.1	1.29503	19.205	1.61131	0.221271	4.1038	0.0308203	3.77424	0.919693	0.964098	195.68	7.27448	202.967	7.54984	288.468	36.8156	195.68	4.36469
SR1-Spot 18	75.6179	28249.2	0.428387	19.0272	1.84957	0.224744	3.40138	0.0310141	2.85456	0.839235	0.956484	196.892	5.53545	205.85	6.33772	309.717	42.121	196.892	3.32127
SR1-Spot 218	219.761	177414	0.563913	19.6901	1.52804	0.220764	3.79253	0.0315264	3.47108	0.915241	0.987901	200.095	6.83875	202.545	6.96405	231.147	35.2639	200.095	4.10325
SR1-Spot 259	358.589	96260.8	0.520219	20.0443	1.36687	0.216961	3.85421	0.0315407	3.60369	0.935002	1.00404	200.184	7.10315	199.378	6.97714	189.83	31.8132	200.184	4.26189
SR1-Spot 126	71.5615	11862.2	0.642497	19.3142	2.02042	0.225175	4.19728	0.0315424	3.679	0.876521	0.970838	200.194	7.25196	206.208	7.833	275.486	46.3077	200.194	4.35118
SR1-Spot 138	376.776	188512	0.964497	19.6062	1.34567	0.23114	3.41958	0.0328675	3.14367	0.919316	0.987359	208.47	6.44879	211.139	6.51892	241.014	30.9978	208.47	3.86927
SR1-Spot 236	359.067	131677	0.495953	19.3857	1.30239	0.237986	3.79416	0.0334604	3.56363	0.93924	0.978777	212.169	7.43786	216.77	7.40609	267.04	29.8801	212.169	4.46272
SR1-Spot 170	1221.35	89277.6	0.305824	19.7192	0.942521	0.241935	2.53262	0.0346008	2.3507	0.928171	0.996707	219.279	5.06792	220.003	5.00959	227.758	21.7799	219.279	3.04075
SR1-Spot 152	379.452	45482	0.391969	19.4503	1.34098	0.279329	3.77407	0.0394041	3.5278	0.934747	0.996056	249.138	8.62143	250.125	8.36725	259.367	30.8064	249.138	5.17286
SR1-Spot 247	588.074	64667.9	0.382983	18.8325	1.31192	0.294223	3.68092	0.0401868	3.4392	0.93433	0.969883	253.991	8.5654	261.878	8.49697	333.052	29.7439	253.991	5.13924
SR1-Spot 240	1989.74	86961.9	0.0391005	18.111	1.04487	0.315933	3.72048	0.0414989	3.57075	0.959754	0.940266	262.117	9.17182	278.769	9.06989	420.917	23.3271	262.117	5.50309
SR1-Spot 97	329.107	131180	0.903859	18.807	1.15215	0.356137	3.47959	0.0485775	3.28331	0.94359	0.988542	305.782	9.80538	309.327	9.27863	336.154	26.0967	305.782	5.88323
SR1-Spot 239	247.217	83319.3	0.627576	18.7994	1.14438	0.356799	4.07582	0.0486481	3.91186	0.959774	0.988362	306.217	11.6987	309.822	10.8835	337.027	25.907	306.217	7.01924
SR1-Spot 212	290.425	54339.1	0.131679	19.1041	1.27621	0.351147	3.6458	0.0486536	3.41513	0.936731	1.00218	306.25	10.2143	305.583	9.62104	300.521	29.1104	306.25	6.12858
SR1-Spot 124	1045.3	218252	0.02277	18.7371	1.26045	0.360581	3.44265	0.0490008	3.2036	0.930565	0.986363	308.384	9.64684	312.648	9.2643	344.584	28.5199	308.384	5.7881
SR1-Spot 21	815.371	50005.1	1.80462	19.0526	1.33027	0.356692	3.08381	0.0492885	2.78214	0.902174	1.00132	310.152	8.42456	309.742	8.23264	306.67	30.2989	310.152	5.05474
SR1-Spot 16	406.461	62991.9	1.11897	18.7734	0.927208	0.376068	3.52267	0.0512044	3.39845	0.964738	0.993123	321.912	10.6714	324.141	9.77555	340.207	20.9961	321.912	6.40281
SR1-Spot 161	92.62	17581	0.518845	19.2074	1.51029	0.376123	4.37598	0.052396	4.1071	0.938554	1.01553	329.215	13.1817	324.182	12.145	288.181	34.5323	329.215	7.90905
SR1-Spot 226	142.555	115977	0.486644	18.852	1.27831	0.391631	3.66681	0.0535466	3.43677	0.937265	1.00208	336.259	11.2602	335.56	10.4782	330.739	28.9855	336.259	6.75614
SR1-Spot 118	105.251	63550	0.800916	17.9006	1.99877	0.420582	4.05706	0.0546031	3.53053	0.87022	0.961437	342.721	11.7839	356.467	12.1968	446.945	44.4444	342.721	7.07032
SR1-Spot 105	712.701	319175	0.171646	18.3431	1.11064	0.418851	3.121	0.0557225	2.9167	0.934539	0.984039	349.559	9.92411	355.229	9.35534	392.424	24.9193	349.559	5.95447
SR1-Spot 273	1044.5	570141	0.485686	18.3282	0.982566	0.429964	3.02983	0.0571546	2.86609	0.945955	0.986637	358.298	9.98897	363.151	9.25055	394.24	22.0389	358.298	5.99338
SR1-Spot 285	429.416	54811	0.113438	18.1193	1.34377	0.436098	3.31409	0.0573092	3.02943	0.914107	0.977532	359.241	10.5853	367.497	10.219	419.897	30.0053	359.241	6.35117
SR1-Spot 233	1164.28	1.59323e+06	0.209676	18.3999	1.14732	0.433792	3.89198	0.057889	3.71903	0.955562	0.991551	362.774	13.1191	365.866	11.9568	385.481	25.7733	362.774	7.87145
SR1-Spot 55	355.504	104152	0.863018	18.0282	1.0536	0.443158	3.22194	0.057944	3.0448	0.945022	0.974852	363.11	10.7504	372.477	10.0463	431.145	23.4867	363.11	6.45023
SR1-Spot 219	732.118	95953.1	0.213336	18.62	1.24455	0.430533	4.74962	0.0581414	4.58367	0.965059	1.00208	364.312	16.2358	363.555	14.5153	358.707	28.0678	364.312	9.74148
SR1-Spot 187	374.402	71583	0.673303	18.2649	1.15952	0.440055	3.50078	0.0582938	3.30317	0.943554	0.986361	365.241	11.7291	370.291	10.8627	402.002	25.9719	365.241	7.03749
SR1-Spot 100	210.829	58549.1	0.147903	18.5831	0.982398	0.437154	3.30213	0.0589183	3.15261	0.954721	1.00217	369.044	11.3078	368.243	10.1993	363.185	22.1328	369.044	6.78466
SR1-Spot 48	389.979	73345.2	0.269815	18.8107	1.34318	0.438229	3.74102	0.0597866	3.49157	0.933322	1.01443	374.328	12.6977	369.003	11.5748	335.681	30.4307	374.328	7.61863
SR1-Spot 45	1166.56	91885.7	0.396032	18.0146	0.919703	0.479173	3.46737	0.0626059	3.34317	0.964181	0.984777	391.454	12.6976	397.505	11.4057	432.825	20.4892	391.454	7.61854
SR1-Spot 184	532.225	402701	0.00741656	18.1091	1.06392	0.484922	3.24708	0.0636896	3.06784	0.944798	0.991482	398.025	11.8414	401.444	10.7673	421.151	23.7512	398.025	7.10486
SR1-Spot 113	247.742	157971	0.633785	17.8563	1.04335	0.492074	2.87701	0.0637268	2.68115	0.931925	0.980132	398.25	10.3546	406.323	9.63438	452.447	23.1865	398.25	6.21274
SR1-Spot 206	287.885	51257.7	0.777832	17.9975	1.08425	0.489752	3.12713	0.0639275	2.93315	0.937967	0.986968	399.467	11.3613	404.741	10.4389	434.933	24.15	399.467	6.81678
SR1-Spot 103	545.186	73434.4	0.286098	18.3533	0.984862	0.483756	3.13679	0.064393	2.97817	0.949432	1.0284	402.286	11.6146	400.646	10.3847	391.176	22.1013	402.286	11.6146
SR1-Spot 269	65.3863	52735.6	0.477861	17.9558	1.15582	0.494759	4.27283	0.0644312	4.11353	0.962719	0.914596	402.518	16.0514	408.148	14.3614	440.105	25.7186	402.518	16.0514
SR1-Spot 278	189.542	89066.9	0.477917	17.9419	1.18161	0.496127	3.59501	0.0645596	3.39528	0.944441	0.912803	403.295	13.2735	409.078	12.1053	441.821	26.3012	403.295	13.2735
SR1-Spot 115	194.699	84164	0.393088	18.1833	1.19325	0.489887	3.52338	0.0646052	3.31517	0.940906	0.979502	403.572	12.9689	404.834	11.7639	412.017	26.681	403.572	12.9689
SR1-Spot 104	761.679	51049.3	0.372255	18.3932	1.18996	0.484345	3.35397	0.0646116	3.13578	0.934945	1.04481	403.61	12.2683	401.05	11.1129	386.301	26.7275	403.61	12.2683
SR1-Spot 287	525.589	192534	0.411469	18.1496	1.12571	0.491117	3.93	0.0646473	3.76533	0.958098	0.970347	403.827	14.739	405.672	13.1438	416.168	25.1521	403.827	14.739
SR1-Spot 171	384.014	197082	0.166782	18.1794	1.25506	0.491333	4.26301	0.0647818	4.07407	0.95568	0.980939	404.641	15.9787	405.818	14.2619	412.503	28.0603	404.641	15.9787
SR1-Spot 68	275.963	36338.8	0.596817	18.1926	1.23597	0.491149	3.84254	0.0648047	3.63834	0.946858	0.985154	404.779	14.2744	405.693	12.8518	410.879	27.6409	404.779	14.2744
SR1-Spot 109	218.525	191784	0.682021	17.8897	0.941631	0.506073	3.315	0.0656622	3.17845	0.958809	0.914505	409.969	12.625	415.805	11.3109	448.296	20.9306	409.969	12.625
SR1-Spot 147	492.344	67959	0.628935	17.9171	1.19102	0.505905	3.25209	0.0657407	3.02614	0.930524	0.92254	410.444	12.0335	415.692	11.0938	444.906	26.4897	410.444	12.0335
SR1-Spot 87	132.82	35697.6	0.709504	18.1272	1.53368	0.501329	3.77545	0.0659103	3.4499	0.913773	0.982216	411.47	13.7518	412.602	12.8017	418.919	34.2526	411.47	13.7518
SR1-Spot 243	169.982	363024	0.525292	17.984	1.13276	0.507097	3.49997	0.0661418	3.31159	0.946177	0.945627	412.869	13.2439	416.495	11.9582	436.609	25.22	412.869	13.2439
SR1-Spot 148	307.374	178129	0.464165	18.0367	1.25405	0.505954	3.61574	0.0661859	3.39131	0.937928	0.96057	413.136	13.5712	415.725	12.3352	430.095	27.9689	413.136	13.5712
SR1-Spot 130	365.544	64938.3	0.416596	17.8496	0.945292	0.512143	2.89437	0.0663006	2.73565	0.945164	0.912945	413.829	10.9652	419.889	9.95396	453.291	21.006	413.829	10.9652
SR1-Spot 246	386.969	99068.5	0.521957	17.9141	1.0076	0.514726	3.22125	0.066876	3.05961	0.94982	0.937193	417.307	12.3635	421.622	11.1151	445.273	22.414	417.307	12.3635
SR1-Spot 203	747.344	123424	0.861366	18.0193	1.20707	0.511942	3.36699	0.0669051	3.14319	0.93353	0.965867	417.483	12.7064	419.755	11.5765	432.236	26.9049	417.483	12.7064
SR1-Spot 271	293.939	68008.4	0.958987	17.7486	1.34825	0.520009	3.82156	0.0669383	3.57582	0.935698	0.896545	417.683	14.4621	425.157	13.2758	465.881	29.8719	417.683	14.4621
SR1-Spot 189	236.48	60706.9	0.263435	18.2383	1.32785	0.509872	3.51542	0.0674442	3.255	0.925919	1.03819	420.739	13.2577	418.363	12.0545	405.262	29.7256	420.739	13.2577
SR1-Spot 305	211.819	42963.5	0.746765	17.7884	1.07138	0.525155	3.08597	0.0677523	2.89401	0.937799	0.916894	422.6	11.8378	428.589	10.7897	460.903	23.7743	422.6	11.8378
SR1-Spot 231	308.874	43247	0.281675	18.0365	0.912744	0.518885	3.26654	0.0678768	3.13643	0.960168	0.984267	423.351	12.8515	424.406	11.3314	430.118	20.3437	423.351	12.8515
SR1-Spot 256	424.573	190246	0.718484	18.0158	1.27368	0.519977	3.82447	0.0679418	3.60615	0.942915	0.979364	423.744	14.7894	425.136	13.2853	432.672	28.3765	423.744	14.7894
SR1-Spot 298	106.94	71794.1	0.992177	17.7978	1.21666	0.530742	4.5944	0.068509	4.43038	0.9643	0.92908	427.167	18.3118	432.302	16.1762	459.774	26.9908	427.167	18.3118
SR1-Spot 213	234.699	53867.1	0.862545	17.4992	1.2376	0.548534	4.35522	0.0696177	4.17568	0.958776	0.872642	433.852	17.5202	444.036	15.666	497.171	27.2683	433.852	17.5202
SR1-Spot 139	458.963	61578.3	1.12847	18.0358	0.972242	0.552239	3.0505	0.0722373	2.89142	0.94785	1.04515	449.621	12.5574	446.462	11.0201	430.198	21.6702	449.621	12.5574
SR1-Spot 173	757.358	59896	0.33417	17.8809	1.22445	0.571362	3.74832	0.0740966	3.54269	0.945139	1.02534	460.789	15.7546	458.895	13.8398	449.4	27.2109	460.789	15.7546
SR1-Spot 244	240.168	79834.4	0.675523	17.7139	1.27616	0.583283	3.62451	0.0749364	3.39241	0.935965	0.990703	465.827	15.2454	466.569	13.5589	470.199	28.2479	465.827	15.2454
SR1-Spot 15	253.003	80678.4	0.223872	17.5265	1.29453	0.591872	7.13464	0.0752353	7.01622	0.983402	0.947169	467.62	31.6478	472.063	26.9416	493.703	28.5174	467.62	31.6478
SR1-Spot 111	241.712	50422.4	0.136651	17.6597	1.15726	0.611976	3.12709	0.0783817	2.90507	0.929001	1.01978	486.456	13.6119	484.805	12.055	477.02	25.6074	486.456	13.6119
SR1-Spot 192	317.795	74533.1	0.218368	17.5418	1.22496	0.628631	3.3055	0.0799778	3.07014	0.928799	1.0085	495.99	14.6566	495.243	12.9558	491.81	27.005	495.99	14.6566
SR1-Spot 49	136.457	51308.2	0.493762	16.9733	1.03638	0.704619	3.78273	0.0867398	3.63798	0.961736	0.950787	536.227	18.7186	541.546	15.8781	563.982	22.5852	536.227	18.7186
SR1-Spot 300	127.392	40974.5	0.582995	16.9829	1.33773	0.707033	3.89641	0.0870866	3.65958	0.939217	0.956544	538.284	18.8989	542.983	16.3882	562.738	29.1412	538.284	18.8989
SR1-Spot 110	276.707	73577.4	0.758587	16.9392	1.27222	0.719066	3.11521	0.0883404	2.84358	0.912807	0.960086	545.715	14.8792	550.115	13.2318	568.402	27.6845	545.715	14.8792
SR1-Spot 61	220.438	36816.4	1.12283	16.7156	0.983216	0.72878	3.77584	0.0883521	3.64558	0.965502	0.913844	545.784	19.078	555.837	16.1635	597.239	21.2983	545.784	19.078
SR1-Spot 183	132.362	30034.4	0.431153	17.0078	1.18528	0.724007	4.15525	0.089308	3.98262	0.958454	0.985487	551.443	21.0488	553.029	17.7205	559.564	25.8563	551.443	21.0488
SR1-Spot 13	774.202	346819	1.31344	16.6026	1.03734	0.744318	4.46593	0.089626	4.34379	0.972649	0.904306	553.325	23.0327	564.922	19.3521	611.878	22.4155	553.325	23.0327
SR1-Spot 41	278.381	105790	0.361444	16.6196	1.39578	0.761638	3.46818	0.0918054	3.17491	0.91544	0.92871	566.205	17.2097	574.954	15.2264	609.668	30.1808	566.205	17.2097
SR1-Spot 25	79.5531	43745.6	1.848	16.4543	1.44431	0.782422	3.68851	0.0933728	3.39398	0.920148	0.911574	575.453	18.6844	586.864	16.4418	631.275	31.1093	575.453	18.6844
SR1-Spot 166	319.007	67703.3	0.512974	16.568	1.20258	0.784342	3.68394	0.0942483	3.48213	0.945219	0.941958	580.613	19.334	587.957	16.444	616.39	25.9672	580.613	19.334
SR1-Spot 67	194.137	48690.3	0.863361	16.4585	1.14384	0.791164	3.61742	0.0944396	3.43182	0.948691	0.922321	581.74	19.09	591.832	16.2255	630.735	24.66	581.74	19.09
SR1-Spot 279	291.035	55197.7	0.432441	16.7417	1.09992	0.78132	4.34144	0.0948695	4.1998	0.967374	0.983836	584.272	23.4592	586.236	19.3376	593.871	23.8189	584.272	23.4592
SR1-Spot 31	166.417	60654.7	0.351375	16.7612	0.947513	0.78388	3.31367	0.0952912	3.17531	0.958247	0.992238	586.754	17.8086	587.694	14.7861	591.344	20.5443	586.754	17.8086
SR1-Spot 168	247.319	78707.6	1.01797	16.2679	0.984141	0.812454	3.5874	0.0958579	3.44977	0.961635	0.899836	590.089	19.4529	603.83	16.3297	655.774	21.1018	590.089	19.4529
SR1-Spot 77	125.956	70249.6	0.757392	16.5235	1.10978	0.800438	4.21209	0.095924	4.06327	0.964666	0.94902	590.478	22.9267	597.076	19.0164	622.197	23.9456	590.478	22.9267
SR1-Spot 128	203.552	118430	0.82502	16.7101	1.37412	0.792755	4.05592	0.0960764	3.81606	0.940861	0.989044	591.374	21.5631	592.733	18.2131	597.925	29.7422	591.374	21.5631
SR1-Spot 281	151.877	31985.2	0.78566	16.403	1.40505	0.810699	3.39785	0.0964452	3.09374	0.910499	0.930307	593.543	17.5427	602.846	15.4483	638.007	30.2501	593.543	17.5427
SR1-Spot 35	109.169	59691.5	0.617738	16.3384	1.35467	0.814592	4.4148	0.0965271	4.20183	0.951759	0.918858	594.024	23.8445	605.027	20.1261	646.481	29.1154	594.024	23.8445
SR1-Spot 228	152.183	56884.1	0.688233	16.3433	1.35632	0.820074	4.35982	0.0972059	4.14348	0.950379	0.925954	598.014	23.6641	608.09	19.9489	645.835	29.1432	598.014	23.6641
SR1-Spot 268	469.981	166338	0.249034	16.383	1.37823	0.820232	3.51307	0.0974604	3.23143	0.919831	0.93581	599.508	18.4992	608.178	16.0754	640.63	29.6496	599.508	18.4992
SR1-Spot 50	293.351	99867.1	0.415785	16.575	0.953785	0.815991	4.01878	0.0980927	3.90395	0.971429	0.980082	603.222	22.4813	605.809	18.3376	615.481	20.6059	603.222	22.4813
SR1-Spot 129	142.387	111483	0.496764	16.5094	1.11674	0.841896	3.5652	0.100807	3.38579	0.949676	0.992156	619.135	19.9874	620.191	16.548	624.029	24.103	619.135	19.9874
SR1-Spot 289	63.9155	14924.5	0.0663984	16.141	1.42052	0.876558	3.99567	0.102615	3.73464	0.934671	0.936366	629.715	22.4055	639.122	18.9535	672.509	30.3883	629.715	22.4055
SR1-Spot 133	85.8248	67967.1	1.04179	16.1051	1.72021	0.880638	3.82853	0.102863	3.42031	0.893374	0.93191	631.165	20.5647	641.327	18.2054	677.281	36.7698	631.165	20.5647
SR1-Spot 275	424.097	225064	0.431519	16.1975	1.21703	0.87686	3.62783	0.10301	3.41759	0.94205	0.950327	632.022	20.5749	639.285	17.2114	665.058	26.0563	632.022	20.5749
SR1-Spot 93	193.378	96455.1	0.590233	16.2415	1.25201	0.879035	3.35748	0.103546	3.11531	0.927871	0.963513	635.155	18.8435	640.461	15.9496	659.207	26.8419	635.155	18.8435
SR1-Spot 202	25.1399	12529.6	1.47808	16.1594	1.80639	0.896327	4.81193	0.105048	4.46	0.926863	0.960964	643.926	27.3315	649.763	23.0981	670.084	38.6391	643.926	27.3315
SR1-Spot 214	156.769	25481.4	0.664366	16.2523	1.27049	0.892169	3.53606	0.105162	3.29993	0.933223	0.979876	644.591	20.2423	647.534	16.9308	657.829	27.2447	644.591	20.2423
SR1-Spot 311	738.574	689140	0.0432152	15.8552	1.03174	0.95879	3.13182	0.110254	2.95699	0.944177	0.948768	674.22	18.9295	682.669	15.5667	710.627	21.942	674.22	18.9295
SR1-Spot 252	262.552	176262	1.1332	16.0864	1.22493	0.953339	4.09658	0.111226	3.90916	0.954249	1.00016	679.861	25.2236	679.84	20.3039	679.75	26.155	679.861	25.2236
SR1-Spot 142	437.704	68125.6	0.717713	16.0339	1.00742	0.959694	3.15929	0.111602	2.99436	0.947797	0.993132	682.044	19.3797	683.138	15.7108	686.761	21.4795	682.044	19.3797
SR1-Spot 308	101.114	72650.2	0.27125	15.6473	1.38867	1.03346	3.91105	0.117283	3.65622	0.934842	0.967932	714.905	24.7414	720.659	20.1855	738.591	29.3871	714.905	24.7414
SR1-Spot 312	542.726	107838	0.545933	15.3807	1.1149	1.05965	3.9866	0.118205	3.82753	0.960098	0.929505	720.225	26.0828	733.649	20.8287	774.848	23.4554	720.225	26.0828
SR1-Spot 208	55.5143	56722.7	1.04176	14.9959	1.5603	1.14977	4.25495	0.125049	3.95854	0.930338	0.917389	759.559	28.3638	777.132	23.1109	827.957	32.5491	759.559	28.3638
SR1-Spot 43	37.354	11097.1	2.38963	15.3728	1.98765	1.19316	4.17747	0.13303	3.6743	0.879552	1.03763	805.128	27.8102	797.423	23.0805	775.93	41.8125	805.128	27.8102
SR1-Spot 260	99.7377	236485	0.491728	14.4458	1.38289	1.40698	3.47203	0.147411	3.18475	0.917258	0.97904	886.432	26.3758	891.885	20.6105	905.409	28.5028	886.432	26.3758
SR1-Spot 258	28.0685	59474.2	0.685106	14.072	1.64909	1.61792	5.80614	0.165125	5.56703	0.958817	1.0271	985.194	50.8617	977.184	36.4506	959.203	33.7152	959.203	33.7152
SR1-Spot 162	421.752	108394	0.091334	13.9032	0.884376	1.58318	3.07446	0.159641	2.94452	0.957735	0.970487	954.783	26.131	963.62	19.1349	983.818	17.9858	983.818	17.9858
SR1-Spot 288	55.8673	15957.5	0.267583	13.858	1.29342	1.55041	3.33473	0.155828	3.07368	0.921717	0.942518	933.55	26.7135	950.655	20.5867	990.485	26.2876	990.485	26.2876
SR1-Spot 94	111.191	68649.2	0.277352	13.7297	1.22723	1.67474	4.21058	0.166766	4.02776	0.956582	0.985067	994.268	37.1117	998.987	26.7755	1009.34	24.8799	1009.34	24.8799
SR1-Spot 197	261.433	51005.8	0.329609	13.6901	1.10409	1.69959	3.24159	0.168752	3.04777	0.940208	0.990178	1005.23	28.3681	1008.38	20.725	1015.2	22.3552	1015.2	22.3552
SR1-Spot 44	890.589	385777	0.0749654	13.6738	1.24787	1.58974	3.65053	0.157657	3.43062	0.939761	0.927412	943.743	30.1181	966.194	22.7577	1017.61	25.2556	1017.61	25.2556
SR1-Spot 217	122.371	40861.6	0.300549	13.6648	1.04872	1.70985	3.62312	0.169457	3.46803	0.957193	0.990355	1009.12	32.3951	1012.23	23.2167	1018.94	21.237	1018.94	21.237
SR1-Spot 309	332.682	77375.8	0.275294	13.6306	1.19803	1.70636	3.75735	0.168689	3.56124	0.947805	0.981324	1004.88	33.1368	1010.92	24.059	1024.01	24.2612	1024.01	24.2612
SR1-Spot 149	91.6434	65785.9	1.36449	13.6232	1.2428	1.73786	3.73318	0.171708	3.52024	0.94296	0.996486	1021.52	33.2557	1022.67	24.0654	1025.12	25.1628	1025.12	25.1628
SR1-Spot 140	236.922	169752	0.369811	13.5832	1.05732	1.6846	3.43147	0.165958	3.26452	0.951346	0.95998	989.8	29.954	1002.72	21.8673	1031.06	21.3914	1031.06	21.3914
SR1-Spot 191	277.874	70775.9	0.853854	13.5271	1.12928	1.81286	3.41187	0.177855	3.21957	0.943636	1.01522	1055.25	31.3397	1050.11	22.3311	1039.43	22.8172	1039.43	22.8172
SR1-Spot 245	242.218	65649.9	0.396131	13.4958	1.11297	1.77505	3.62782	0.173743	3.45288	0.951778	0.989087	1032.7	32.9486	1036.37	23.5664	1044.1	22.472	1044.1	22.472
SR1-Spot 299	75.4868	38705.9	0.353765	13.4904	1.16779	1.83087	3.71807	0.179136	3.52992	0.949395	1.01661	1062.25	34.5705	1056.59	24.4213	1044.89	23.5742	1044.89	23.5742
SR1-Spot 196	28.2547	27403.8	0.647936	13.4753	1.28973	1.79642	5.07458	0.175568	4.90795	0.967164	0.995727	1042.72	47.2525	1044.16	33.1123	1047.19	26.0261	1047.19	26.0261
SR1-Spot 185	521.989	1.29719e+07	0.0610345	13.4697	1.22325	1.67101	3.50032	0.163244	3.27962	0.936948	0.930108	974.781	29.6696	997.572	22.2388	1048.03	24.682	1048.03	24.682
SR1-Spot 262	476.112	82183.7	0.743068	13.4658	1.21257	1.79865	3.71388	0.175663	3.51035	0.945198	0.99487	1043.24	33.8119	1044.97	24.2403	1048.62	24.4639	1048.62	24.4639
SR1-Spot 179	370.933	73915.7	0.145616	13.4136	1.02569	1.75209	3.28898	0.170452	3.12496	0.950129	0.96039	1014.6	29.3369	1027.94	21.2642	1056.45	20.672	1056.45	20.672
SR1-Spot 120	303.347	132204	0.313848	13.4051	1.29873	1.86013	3.63381	0.180848	3.39381	0.933951	1.01313	1071.6	33.5064	1067.03	24.0011	1057.72	26.147	1057.72	26.147
SR1-Spot 95	143.935	249298	0.411309	13.4008	1.15031	1.84474	3.3842	0.179293	3.1827	0.940459	1.00447	1063.11	31.1931	1061.55	22.2868	1058.37	23.1588	1058.37	23.1588
SR1-Spot 251	64.413	176710	0.668438	13.3947	1.2927	1.76999	5.51327	0.171949	5.35957	0.972123	0.965596	1022.84	50.6932	1034.52	35.7858	1059.29	26.0285	1059.29	26.0285
SR1-Spot 204	412.882	163734	0.186578	13.3841	0.863409	1.79643	4.02555	0.174381	3.93186	0.976728	0.976742	1036.2	37.6367	1044.16	26.2639	1060.88	17.3915	1060.88	17.3915
SR1-Spot 186	234.525	96519.6	0.658493	13.3767	1.10792	1.89207	3.38472	0.183564	3.19826	0.94491	1.023	1086.41	31.9765	1078.31	22.4881	1061.99	22.3101	1061.99	22.3101
SR1-Spot 157	226.728	62241.4	0.492799	13.3247	1.06907	1.84315	3.68846	0.178121	3.53014	0.957075	0.987726	1056.7	34.4063	1060.98	24.2839	1069.83	21.4648	1069.83	21.4648
SR1-Spot 9	46.9039	44502.5	0.72524	13.3082	1.20305	1.69289	3.75748	0.163398	3.55968	0.947359	0.909835	975.632	32.2293	1005.86	23.9893	1072.32	24.155	1072.32	24.155
SR1-Spot 108	109.212	72450	0.65064	13.2733	1.07074	1.83164	3.27437	0.176326	3.09435	0.945021	0.971512	1046.87	29.9006	1056.87	21.5092	1077.57	21.4856	1077.57	21.4856
SR1-Spot 290	352.533	605649	0.57894	13.2684	1.16848	1.9257	3.34716	0.185314	3.13658	0.937087	1.01634	1095.94	31.612	1090.05	22.3736	1078.31	23.4519	1078.31	23.4519
SR1-Spot 200	79.9586	69216.8	0.606368	13.2631	1.38664	1.82424	3.78448	0.175479	3.5213	0.930457	0.965817	1042.23	33.8872	1054.21	24.8258	1079.12	27.8202	1079.12	27.8202
SR1-Spot 131	429.281	72587	0.0107735	13.2562	1.19249	1.83225	3.66627	0.176157	3.46691	0.945625	0.968344	1045.95	33.4735	1057.09	24.0873	1080.14	23.917	1080.14	23.917
SR1-Spot 296	239.916	296448	1.37378	13.2473	1.41778	1.77895	4.16364	0.170919	3.91481	0.940239	0.940504	1017.17	36.8381	1037.8	27.07	1081.52	28.4234	1081.52	28.4234
SR1-Spot 172	300.039	146403	0.360746	13.2348	1.06949	1.896	3.31177	0.181993	3.13433	0.946421	0.994896	1077.85	31.1104	1079.69	22.019	1083.38	21.4291	1083.38	21.4291
SR1-Spot 230	171.01	186973	0.466007	13.1986	1.96596	1.51657	5.80695	0.145175	5.46403	0.940947	0.802516	873.857	44.6537	937.095	35.5475	1088.9	39.3971	1088.9	39.3971
SR1-Spot 79	226.129	59913.9	0.239705	13.1672	1.28907	1.6551	3.77164	0.158059	3.54452	0.93978	0.864956	945.979	31.1865	991.505	23.8773	1093.67	25.8134	1093.67	25.8134
SR1-Spot 193	257.912	161180	0.646444	13.1653	1.16935	1.88962	4.23975	0.180427	4.07531	0.961213	0.977457	1069.31	40.1557	1077.45	28.1589	1093.97	23.4136	1093.97	23.4136
SR1-Spot 194	829.966	154538	0.25601	13.1319	0.971946	1.79554	2.89137	0.17101	2.72311	0.941807	0.925977	1017.67	25.6358	1043.84	18.8587	1099.03	19.4504	1099.03	19.4504
SR1-Spot 205	405.518	87969.9	0.278074	13.0267	1.12239	1.5983	6.5089	0.151006	6.4114	0.98502	0.813034	906.597	54.2246	969.546	40.6761	1115.08	22.4227	1115.08	22.4227
SR1-Spot 229	410.419	81659.8	0.316668	13.0011	1.07077	1.92133	3.45066	0.181168	3.28032	0.950636	0.959165	1073.35	32.4345	1088.53	23.0477	1119.05	21.3528	1119.05	21.3528
SR1-Spot 76	74.384	41818.6	0.427888	12.9352	1.0775	2.02889	3.39649	0.190341	3.22105	0.948345	0.994755	1123.22	33.2032	1125.24	23.1052	1129.14	21.4607	1129.14	21.4607
SR1-Spot 78	20.0517	52815.5	0.394685	12.8725	1.42363	1.99353	4.63565	0.186115	4.41164	0.951676	0.966144	1100.3	44.6252	1113.32	31.3558	1138.85	28.3173	1138.85	28.3173
SR1-Spot 283	260.629	408729	0.0103968	12.839	1.29063	2.04345	4.81527	0.19028	4.63909	0.963411	0.981556	1122.89	47.8083	1130.11	32.8398	1143.99	25.6342	1143.99	25.6342
SR1-Spot 89	398.793	124198	0.314138	12.8228	1.16877	1.98206	3.98517	0.184331	3.80993	0.956026	0.951201	1090.59	38.2265	1109.42	26.9016	1146.54	23.2091	1146.54	23.2091
SR1-Spot 144	28.5935	98044	0.766554	12.8064	1.49994	2.06613	4.31091	0.191904	4.04155	0.937516	0.984863	1131.68	41.9484	1137.65	29.5045	1149.08	29.7909	1149.08	29.7909
SR1-Spot 135	705.534	801277	0.391829	12.7909	1.05855	1.91817	3.2184	0.177945	3.03934	0.944363	0.91686	1055.74	29.5979	1087.43	21.4838	1151.47	21.0162	1151.47	21.0162
SR1-Spot 174	313.265	271554	0.54744	12.7673	0.899328	2.12628	3.517	0.196888	3.40008	0.966754	1.003	1158.58	36.0559	1157.38	24.2928	1155.11	17.8458	1155.11	17.8458
SR1-Spot 82	66.7925	42154.9	0.547983	12.7657	1.45952	2.11681	3.97093	0.195987	3.69298	0.930003	0.998592	1153.73	39.0123	1154.3	27.3905	1155.35	28.9716	1155.35	28.9716
SR1-Spot 27	80.2899	75305.1	0.775895	12.7119	1.1929	2.13911	4.51675	0.197216	4.35638	0.964494	0.997089	1160.35	46.2616	1161.54	31.2622	1163.74	23.6412	1163.74	23.6412
SR1-Spot 220	118.866	71898	0.486218	12.7098	0.738945	2.22553	4.33096	0.20515	4.26746	0.985337	1.03339	1202.93	46.8302	1189.11	30.3512	1164.06	14.653	1164.06	14.653
SR1-Spot 36	95.7706	86802.1	0.362892	12.7028	0.901219	2.09935	3.35247	0.193412	3.22906	0.96319	0.97827	1139.83	33.7359	1148.59	23.0613	1165.15	17.8574	1165.15	17.8574
SR1-Spot 238	690.973	74588.9	0.931701	12.6922	0.998795	1.82173	3.40734	0.167695	3.25766	0.956072	0.856528	999.401	30.1591	1053.31	22.34	1166.8	19.7991	1166.8	19.7991
SR1-Spot 242	118.704	67909.5	0.750324	12.6736	1.30813	1.98298	3.34557	0.182271	3.07923	0.92039	0.922764	1079.37	30.6029	1109.73	22.586	1169.71	25.9022	1169.71	25.9022
SR1-Spot 143	60.8702	90698.4	1.0646	12.6217	1.17459	2.16847	3.9681	0.198504	3.79027	0.955185	0.991	1167.28	40.4691	1170.99	27.5819	1177.88	23.2379	1177.88	23.2379
SR1-Spot 42	79.0311	76808.6	0.652755	12.5945	1.35822	2.14835	3.73533	0.196239	3.47964	0.931549	0.977114	1155.08	36.798	1164.52	25.8866	1182.14	26.8649	1182.14	26.8649
SR1-Spot 294	183.978	119087	0.316708	12.5584	1.08889	2.0836	4.26443	0.189779	4.12307	0.966851	0.943069	1120.18	42.3963	1143.42	29.2663	1187.8	21.5157	1187.8	21.5157
SR1-Spot 121	66.7396	69342.7	0.383709	12.5344	1.0275	2.16363	4.13713	0.196692	4.0075	0.968668	0.971446	1157.52	42.4621	1169.44	28.737	1191.55	20.2807	1191.55	20.2807
SR1-Spot 222	331.404	192349	0.354924	12.5206	0.98301	2.15557	3.56105	0.195743	3.42268	0.961145	0.965381	1152.41	36.1192	1166.85	24.7046	1193.74	19.3877	1193.74	19.3877
SR1-Spot 211	281.302	154826	0.204162	12.483	1.57295	2.13312	4.10956	0.193122	3.79662	0.92385	0.948826	1138.26	39.6157	1159.6	28.4169	1199.66	31.0298	1199.66	31.0298
SR1-Spot 23	396.635	218864	0.204237	12.4309	1.03364	2.14397	3.18987	0.193295	3.01775	0.946044	0.943101	1139.2	31.5121	1163.11	22.0908	1207.93	20.3354	1207.93	20.3354
SR1-Spot 266	249.442	269494	0.199702	12.3972	1.77548	1.91634	4.8007	0.172303	4.46031	0.929097	0.844665	1024.79	42.2614	1086.79	32.0415	1213.25	34.9283	1213.25	34.9283
SR1-Spot 39	120.652	61279.2	1.76234	12.3211	1.04853	2.28291	3.02039	0.204003	2.83255	0.93781	0.976695	1196.79	30.9392	1207.02	21.3298	1225.35	20.6125	1225.35	20.6125
SR1-Spot 232	473.614	58363.8	0.29194	12.2688	1.02923	2.18864	3.72667	0.194749	3.58173	0.961106	0.929742	1147.05	37.6369	1177.43	25.9785	1233.73	20.1768	1233.73	20.1768
SR1-Spot 199	225.582	185922	0.489534	12.2006	1.27146	2.28355	4.71152	0.202064	4.53671	0.962899	0.953218	1186.4	49.162	1207.21	33.2823	1244.62	24.9134	1244.62	24.9134
SR1-Spot 51	574.643	106120	0.309131	12.1364	0.959641	1.94036	3.52135	0.170794	3.38807	0.96215	0.809988	1016.48	31.8615	1095.12	23.5993	1254.94	18.7647	1254.94	18.7647
SR1-Spot 151	279.631	158331	0.593015	12.0187	1.11922	2.02571	3.95243	0.176577	3.79065	0.959069	0.822791	1048.25	36.6733	1124.18	26.8748	1274.01	21.8327	1274.01	21.8327
SR1-Spot 52	605.87	250349	0.290701	11.9681	1.27205	2.38384	3.40323	0.20692	3.15655	0.927518	0.945554	1212.39	34.8866	1237.76	24.3484	1282.2	24.7663	1282.2	24.7663
SR1-Spot 302	208.756	176982	0.314824	11.9575	1.16258	2.29221	4.39289	0.198789	4.23626	0.964345	0.910336	1168.81	45.2854	1209.89	31.0658	1283.93	22.6348	1283.93	22.6348
SR1-Spot 80	563.782	96934.3	0.845645	11.7797	0.979709	2.52357	3.3543	0.2156	3.20804	0.956395	0.958521	1258.59	36.6793	1278.85	24.3977	1313.05	19.0052	1313.05	19.0052
SR1-Spot 38	122.452	65160.6	0.531717	11.7011	1.14932	2.60841	3.52769	0.221362	3.33522	0.945439	0.972133	1289.07	38.9678	1303.01	25.8985	1326.02	22.2555	1326.02	22.2555
SR1-Spot 29	150.331	59468.3	0.633452	11.6942	0.935833	2.76706	3.38532	0.234686	3.2534	0.961032	1.02399	1359.01	39.865	1346.7	25.2543	1327.17	18.1187	1327.17	18.1187
SR1-Spot 32	115.714	50226.9	0.505357	11.6834	1.08126	2.57354	4.32986	0.218073	4.19268	0.968318	0.956908	1271.68	48.3889	1293.15	31.6721	1328.95	20.9285	1328.95	20.9285
SR1-Spot 57	49.056	28561.3	0.376876	11.6156	1.07765	2.83885	4.28651	0.239157	4.14884	0.967882	1.03141	1382.31	51.6191	1365.87	32.1974	1340.21	20.8246	1340.21	20.8246
SR1-Spot 10	87.3681	36805.6	0.52139	11.5448	1.16874	2.8419	4.11488	0.237955	3.94541	0.958816	1.01778	1376.06	48.8887	1366.67	30.916	1352.01	22.5487	1352.01	22.5487
SR1-Spot 125	158.723	118515	0.296295	11.4489	1.00283	2.76629	3.7558	0.229699	3.61945	0.963694	0.974286	1332.92	43.584	1346.49	28.0174	1368.1	19.3042	1368.1	19.3042
SR1-Spot 201	315.294	86143.6	0.364966	11.4185	1.21635	2.62913	4.4443	0.21773	4.27461	0.961819	0.924744	1269.87	49.2709	1308.82	32.7034	1373.21	23.3981	1373.21	23.3981
SR1-Spot 248	215.481	127204	0.374963	11.3788	1.17663	2.92224	3.62481	0.241163	3.42852	0.94585	1.00929	1392.74	42.945	1387.69	27.4285	1379.91	22.6133	1379.91	22.6133
SR1-Spot 216	84.9316	54458.8	0.638887	11.3617	1.14063	2.82552	3.87624	0.23283	3.70461	0.955724	0.975783	1349.31	45.1029	1362.33	29.0782	1382.8	21.9129	1382.8	21.9129
SR1-Spot 210	212.884	57482.4	0.354321	11.3485	1.07866	2.61021	2.88875	0.21484	2.67981	0.92767	0.9058	1254.55	30.5506	1303.51	21.2103	1385.02	20.7162	1385.02	20.7162
SR1-Spot 122	584.24	81920.4	0.216266	11.3428	1.35264	2.28345	4.3103	0.187851	4.09256	0.949484	0.800675	1109.72	41.7225	1207.18	30.4459	1385.98	25.9747	1385.98	25.9747
SR1-Spot 209	220.721	800064	0.27288	11.3004	0.989177	2.76605	3.48324	0.226701	3.33983	0.95883	0.945452	1317.18	39.789	1346.42	25.9826	1393.18	18.975	1393.18	18.975
SR1-Spot 307	540.701	488866	0.408511	11.2758	0.953695	2.75903	3.45118	0.225633	3.3168	0.96106	0.938611	1311.57	39.3627	1344.53	25.726	1397.36	18.284	1397.36	18.284
SR1-Spot 224	144.6	204950	0.318281	11.2556	0.954218	2.98261	3.1328	0.243481	2.98394	0.952484	1.00284	1404.77	37.6651	1403.2	23.8271	1400.79	18.2854	1400.79	18.2854
SR1-Spot 92	354.504	75531	0.241658	11.25	1.0908	2.75633	3.61045	0.224896	3.44173	0.953269	0.932904	1307.7	40.7365	1343.8	26.9067	1401.75	20.9001	1401.75	20.9001
SR1-Spot 28	314.275	157507	0.472626	11.2488	0.989833	2.72692	3.91715	0.222473	3.79003	0.967547	0.923663	1294.93	44.4637	1335.82	29.1099	1401.95	18.9649	1401.95	18.9649
SR1-Spot 90	214.278	152719	0.404934	11.2344	1.20086	2.96508	3.84341	0.241594	3.65099	0.949935	0.99329	1394.98	45.7976	1398.72	29.1911	1404.4	23.0008	1404.4	23.0008
SR1-Spot 274	150.331	57014	0.32557	11.2249	1.24811	2.95776	3.87076	0.240792	3.66402	0.946588	0.989178	1390.81	45.8381	1396.84	29.3806	1406.03	23.9006	1406.03	23.9006
SR1-Spot 167	283.771	82860.2	0.216904	11.2024	1.15234	2.95907	3.2575	0.240417	3.04687	0.93534	0.985105	1388.87	38.0693	1397.18	24.7265	1409.87	22.055	1409.87	22.055
SR1-Spot 74	467.464	155979	0.400362	11.1915	1.13679	2.56768	3.56352	0.208414	3.37733	0.947752	0.864443	1220.36	37.5499	1291.48	26.0471	1411.73	21.7519	1411.73	21.7519
SR1-Spot 249	154.283	95911.4	0.553345	11.1454	1.21866	3.08534	3.30796	0.249401	3.0753	0.929667	1.01111	1435.39	39.5738	1429.05	25.372	1419.62	23.2934	1419.62	23.2934
SR1-Spot 272	604.684	197010	0.15448	11.0661	1.26675	2.59818	3.47576	0.208527	3.2367	0.931222	0.851886	1220.97	36.0025	1300.12	25.4892	1433.25	24.1681	1433.25	24.1681
SR1-Spot 12	256.623	177965	1.01013	11.0372	0.778386	2.94472	3.59251	0.235723	3.50717	0.976245	0.948673	1364.42	43.1283	1393.49	27.237	1438.24	14.8403	1438.24	14.8403
SR1-Spot 47	415.52	1.35371e+06	0.349035	10.9883	1.09467	3.01789	2.81228	0.240509	2.59048	0.921133	0.960348	1389.34	32.3769	1412.15	21.4515	1446.71	20.8469	1446.71	20.8469
SR1-Spot 190	98.7641	4.54412e+06	0.273276	10.9853	1.10376	3.12009	3.71704	0.248587	3.54938	0.954894	0.988915	1431.18	45.5552	1437.66	28.5892	1447.23	21.0185	1447.23	21.0185
SR1-Spot 62	114.431	69987.4	0.349894	10.9823	1.04642	3.05789	3.28956	0.243563	3.11869	0.948056	0.970602	1405.19	39.3767	1422.21	25.1755	1447.76	19.9251	1447.76	19.9251
SR1-Spot 270	283.873	58341.4	0.277675	10.9758	1.06513	3.15442	3.69012	0.251106	3.53306	0.957436	0.996762	1444.18	45.7129	1446.08	28.4573	1448.87	20.2784	1448.87	20.2784
SR1-Spot 169	93.0059	59588.9	0.42658	10.9609	1.32012	3.17271	4.43705	0.252218	4.23612	0.954715	0.998928	1449.9	55.0039	1450.54	34.269	1451.46	25.1245	1451.46	25.1245
SR1-Spot 156	194.104	97351.2	0.132703	10.9383	1.3705	3.01042	3.0955	0.238822	2.77558	0.89665	0.948588	1380.57	34.4939	1410.26	23.5981	1455.39	26.0697	1455.39	26.0697
SR1-Spot 292	82.8148	88847.3	1.39347	10.8958	1.29939	3.19511	4.55689	0.25249	4.3677	0.958483	0.992151	1451.3	56.7613	1455.98	35.2545	1462.79	24.6924	1462.79	24.6924
SR1-Spot 315	49.8967	81456.4	0.267252	10.8492	1.31148	3.1504	3.57174	0.247891	3.32225	0.930149	0.970533	1427.59	42.5443	1445.1	27.5354	1470.94	24.8947	1470.94	24.8947
SR1-Spot 253	76.3924	27277.4	0.756432	10.6186	1.44522	3.26528	6.16052	0.251469	5.9886	0.972093	0.956631	1446.05	77.5763	1472.82	47.9228	1511.6	27.2836	1511.6	27.2836
SR1-Spot 66	357.103	1.36199e+06	0.572411	10.574	1.07749	3.22865	3.05911	0.247605	2.86306	0.935916	0.938523	1426.11	36.63	1464.06	23.7204	1519.53	20.3191	1519.53	20.3191
SR1-Spot 237	73.2628	66889.7	0.64055	10.5135	1.12942	3.16345	3.70587	0.241216	3.52957	0.952427	0.910257	1393.02	44.2186	1448.29	28.5984	1530.35	21.2681	1530.35	21.2681
SR1-Spot 46	331.848	92027.5	0.133275	10.5026	0.922961	3.3348	3.16701	0.254019	3.02954	0.956592	0.952271	1459.17	39.5605	1489.24	24.7438	1532.3	17.3753	1532.3	17.3753
SR1-Spot 303	394.505	286719	0.473734	10.4889	0.897513	3.1471	3.22614	0.239407	3.09878	0.960523	0.901514	1383.62	38.5867	1444.29	24.8637	1534.77	16.8906	1534.77	16.8906
SR1-Spot 150	331.981	148608	0.231253	10.4693	1.42175	3.26952	4.20971	0.248257	3.96236	0.941243	0.929279	1429.48	50.8019	1473.83	32.7445	1538.27	26.7457	1538.27	26.7457
SR1-Spot 293	36.0155	98541.9	0.563104	10.4439	1.15795	3.27867	3.53648	0.248347	3.34153	0.944876	0.926826	1429.95	42.8543	1476	27.523	1542.84	21.771	1542.84	21.771
SR1-Spot 72	23.2755	14511.1	0.648557	10.4283	1.36522	3.22207	6.47983	0.243696	6.33438	0.977553	0.909571	1405.88	80.0163	1462.48	50.2525	1545.65	25.6587	1545.65	25.6587
SR1-Spot 65	369.699	70085.7	0.413214	10.3736	0.976112	3.13066	3.18866	0.235541	3.03559	0.951993	0.876535	1363.47	37.3057	1440.26	24.5437	1555.53	18.3214	1555.53	18.3214
SR1-Spot 263	988.582	311600	0.343129	10.3083	1.15555	3.6983	3.36878	0.276495	3.16439	0.939329	1.00402	1573.69	44.1859	1571	26.9318	1567.38	21.6543	1567.38	21.6543
SR1-Spot 141	372.762	1.77964e+06	0.104409	10.3081	1.79903	3.45033	3.66615	0.257951	3.19439	0.871321	0.943817	1479.35	42.2267	1515.94	28.8686	1567.41	33.7151	1567.41	33.7151
SR1-Spot 59	110.27	56312.8	0.993188	10.1668	1.16507	3.48948	3.72534	0.257302	3.53847	0.949838	0.926429	1476.02	46.6815	1524.84	29.4091	1593.24	21.7591	1593.24	21.7591
SR1-Spot 11	760.432	890863	0.360238	10.1537	1.09564	3.50468	3.74183	0.258091	3.57783	0.956171	0.927576	1480.07	47.3159	1528.27	29.568	1595.63	20.4575	1595.63	20.4575
SR1-Spot 107	7.58739	57367.2	0.723974	10.0726	1.56738	3.85016	8.43753	0.281267	8.29068	0.982595	0.992019	1597.74	117.337	1603.3	68.1112	1610.6	29.2082	1610.6	29.2082
SR1-Spot 88	258.18	53040.5	0.582958	10.0466	1.13536	3.54574	3.74928	0.258359	3.57324	0.953047	0.917064	1481.44	47.2941	1537.48	29.7032	1615.42	21.1433	1615.42	21.1433
SR1-Spot 101	135.712	117964	0.361562	10.0341	1.23131	3.79773	3.54812	0.276376	3.32762	0.937853	0.972397	1573.08	46.4495	1592.27	28.5254	1617.74	22.9235	1617.74	22.9235
SR1-Spot 178	251.617	215387	0.962941	10.0269	1.19027	3.76521	3.52537	0.273814	3.31836	0.941279	0.963603	1560.13	45.9832	1585.36	28.2914	1619.06	22.1555	1619.06	22.1555
SR1-Spot 132	82.5075	97008.2	1.20978	9.9689	1.11459	3.86037	3.71614	0.27911	3.54505	0.95396	0.973629	1586.88	49.8673	1605.44	29.9783	1629.86	20.7178	1629.86	20.7178
SR1-Spot 254	165.306	781435	0.623727	9.88113	0.931533	3.9849	4.04581	0.285576	3.9371	0.973132	0.983664	1619.39	56.3807	1631.12	32.8509	1646.28	17.2781	1646.28	17.2781
SR1-Spot 20	157.603	59980.8	0.752841	9.86487	1.01032	3.90148	3.75904	0.279138	3.62072	0.963204	0.962218	1587.02	50.9359	1613.99	30.3905	1649.33	18.7323	1649.33	18.7323
SR1-Spot 295	116.283	52362.7	0.693949	9.85862	1.13269	3.93045	4.06372	0.281033	3.90267	0.960369	0.967314	1596.56	55.1934	1619.97	32.905	1650.51	20.9984	1650.51	20.9984
SR1-Spot 207	150.902	314706	0.486652	9.73953	0.988253	4.31938	3.3959	0.305111	3.24892	0.956719	1.02606	1716.6	48.9639	1697.07	28.0062	1673	18.2679	1673	18.2679
SR1-Spot 277	310.506	74033.1	0.280513	9.73242	1.21411	4.02485	3.82041	0.284099	3.62236	0.948159	0.962743	1611.97	51.6642	1639.23	31.0815	1674.35	22.4396	1674.35	22.4396
SR1-Spot 71	304.929	2.66419e+07	0.25316	9.71174	1.11435	4.35364	3.429	0.306653	3.24288	0.945721	1.02737	1724.22	49.0619	1703.59	28.3213	1678.29	20.5854	1678.29	20.5854
SR1-Spot 85	77.5782	66844.2	0.516243	9.67826	1.01031	4.25896	3.58252	0.298951	3.43711	0.959411	1.00086	1686.11	50.9951	1685.47	29.4676	1684.66	18.648	1684.66	18.648
SR1-Spot 64	395.407	380874	0.359672	9.66041	0.942386	4.2394	3.24421	0.297029	3.10432	0.95688	0.993182	1676.56	45.8291	1681.68	26.6601	1688.07	17.3865	1688.07	17.3865
SR1-Spot 180	178.821	317726	0.436919	9.65494	0.855564	4.32019	3.38974	0.302518	3.27999	0.967623	1.00869	1703.78	49.1096	1697.22	27.9564	1689.11	15.7824	1689.11	15.7824
SR1-Spot 235	239.03	217064	0.103441	9.6438	1.03169	4.18006	3.79675	0.292368	3.65389	0.962374	0.977596	1653.35	53.2878	1670.12	31.119	1691.24	19.0268	1691.24	19.0268
SR1-Spot 198	253.871	89255.5	0.642607	9.63237	1.03045	4.2491	3.17861	0.296844	3.00695	0.945995	0.989494	1675.64	44.3703	1683.56	26.1322	1693.43	18.9986	1693.43	18.9986
SR1-Spot 6	622.208	316426	0.0222407	9.61033	1.05677	4.17832	3.22732	0.291232	3.0494	0.944871	0.970564	1647.68	44.3378	1669.78	26.4474	1697.65	19.4735	1697.65	19.4735
SR1-Spot 297	506.831	216161	0.216253	9.58077	1.21881	4.3624	3.02329	0.303127	2.76672	0.915138	1.00204	1706.79	41.4885	1705.25	24.9783	1703.32	22.444	1703.32	22.444
SR1-Spot 155	354.319	870055	0.76911	9.54505	0.97768	4.21981	3.60624	0.292126	3.47118	0.962549	0.966053	1652.14	50.5906	1677.88	29.6105	1710.2	17.9875	1710.2	17.9875
SR1-Spot 34	648.24	215106	0.465323	9.52204	0.839331	4.38401	3.23386	0.302761	3.12304	0.965731	0.994369	1704.98	46.7884	1709.33	26.7434	1714.64	15.4331	1714.64	15.4331
SR1-Spot 306	480.329	149032	0.291565	9.51734	1.18045	4.45944	3.83598	0.307819	3.64984	0.951473	1.0084	1729.96	55.3796	1723.46	31.8259	1715.55	21.704	1715.55	21.704
SR1-Spot 188	58.7707	72050.4	0.465059	9.50115	1.02208	4.36127	3.87787	0.30053	3.74075	0.964641	0.985605	1693.94	55.7257	1705.03	32.0415	1718.68	18.7843	1718.68	18.7843
SR1-Spot 215	116.735	174067	0.445359	9.47244	1.09766	4.58783	3.85736	0.315186	3.69789	0.958657	1.02432	1766.18	57.1299	1747.06	32.1684	1724.24	20.1596	1724.24	20.1596
SR1-Spot 164	97.5373	226248	0.776592	9.44906	1.11508	4.58925	3.9139	0.314506	3.75169	0.958556	1.01971	1762.84	57.866	1747.32	32.642	1728.78	20.4679	1728.78	20.4679
SR1-Spot 86	450.638	411868	0.302946	9.43951	1.03079	4.27967	3.24481	0.292994	3.07673	0.9482	0.95715	1656.47	44.9445	1689.46	26.713	1730.63	18.916	1730.63	18.916
SR1-Spot 225	251.03	187348	0.28662	9.40908	0.891355	4.71309	3.66004	0.321626	3.54984	0.969892	1.03519	1797.67	55.6905	1769.57	30.6678	1736.55	16.3448	1736.55	16.3448
SR1-Spot 177	386.427	269870	0.208406	9.4039	1.20182	4.47421	3.16192	0.305156	2.92462	0.924949	0.988065	1716.83	44.0812	1726.2	26.2466	1737.57	22.0359	1737.57	22.0359
SR1-Spot 146	359.586	466038	0.418678	9.38721	1.05667	4.57541	3.01141	0.311505	2.81994	0.936418	1.00419	1748.11	43.1778	1744.8	25.0982	1740.82	19.3663	1740.82	19.3663
SR1-Spot 5	187.729	906600	0.587308	9.38494	0.965223	4.48855	3.48586	0.305518	3.34956	0.9609	0.986991	1718.61	50.5322	1728.86	28.9538	1741.26	17.6891	1741.26	17.6891
SR1-Spot 257	126.855	5.31439e+06	0.557771	9.35918	1.14302	4.4294	3.40083	0.300664	3.20299	0.941826	0.970396	1694.6	47.7307	1717.85	28.1786	1746.3	20.935	1746.3	20.935
SR1-Spot 106	720.1	3.45387e+07	0.318186	9.29022	0.962641	4.81485	3.1598	0.32442	3.00959	0.952464	1.02923	1811.28	47.5243	1787.5	26.5725	1759.83	17.6028	1759.83	17.6028
SR1-Spot 1	138.377	77756.9	0.324431	9.24578	1.25472	4.71637	3.48235	0.316264	3.24845	0.932833	1.00162	1771.46	50.3165	1770.15	29.1816	1768.59	22.9174	1768.59	22.9174
SR1-Spot 8	119.597	59631.6	0.852784	9.21787	1.06701	4.5465	3.25792	0.303953	3.07824	0.944847	0.964359	1710.88	46.2565	1739.52	27.1227	1774.11	19.4751	1774.11	19.4751
SR1-Spot 136	99.1824	53209.1	1.38467	9.06063	0.919012	4.81954	3.13587	0.31671	2.99818	0.956093	0.98238	1773.64	46.4896	1788.31	26.3756	1805.46	16.7088	1805.46	16.7088
SR1-Spot 267	186.754	1.14357e+06	0.556715	9.02518	1.14777	4.90759	3.35463	0.321235	3.15217	0.939647	0.990718	1795.76	49.4059	1803.56	28.3038	1812.58	20.8504	1812.58	20.8504
SR1-Spot 176	277.426	1.94147e+06	0.779557	8.43492	1.18142	5.18202	4.04543	0.317014	3.86907	0.956406	0.917599	1775.13	60.038	1849.67	34.4453	1934.54	21.1492	1934.54	21.1492
SR1-Spot 30	237.441	107215	0.387088	8.40324	1.12039	5.20654	3.70949	0.317318	3.53625	0.953298	0.915183	1776.62	54.9131	1853.69	31.607	1941.27	20.0404	1941.27	20.0404
SR1-Spot 123	100.028	47719.9	0.289279	8.0578	2.19289	5.1677	4.62888	0.302004	4.07649	0.880665	0.843857	1701.24	60.9562	1847.31	39.4002	2016.03	38.8873	2016.03	38.8873
SR1-Spot 96	80.8029	88045.7	0.783548	7.98788	1.09009	5.64224	6.05771	0.326875	5.95882	0.983676	0.897488	1823.22	94.6371	1922.58	52.2949	2031.47	19.2947	2031.47	19.2947
SR1-Spot 4	204.547	72571.9	0.267933	7.96629	0.907955	5.96623	2.70868	0.344711	2.55198	0.942146	0.937649	1909.29	42.1723	1970.93	23.5596	2036.26	16.0616	2036.26	16.0616
SR1-Spot 14	160.486	207541	0.373817	7.77834	0.948326	6.54412	2.66343	0.369179	2.48889	0.934465	0.974571	2025.54	43.262	2051.85	23.4635	2078.39	16.6955	2078.39	16.6955
SR1-Spot 304	206.131	71943.3	0.521773	7.61756	1.17623	5.65621	3.83151	0.312493	3.6465	0.951713	0.828791	1752.96	55.9691	1924.71	33.0713	2115.08	20.623	2115.08	20.623
SR1-Spot 58	151.062	111284	0.824251	7.58083	1.13371	6.73184	3.5987	0.370126	3.41546	0.949081	0.955941	2029.99	59.4797	2076.81	31.8251	2123.55	19.8586	2123.55	19.8586
SR1-Spot 117	97.2354	80689.3	0.843783	7.50827	1.11361	7.51054	3.89217	0.408987	3.72946	0.958195	1.03266	2210.29	69.7886	2174.25	34.8905	2140.39	19.4699	2140.39	19.4699
SR1-Spot 54	400.69	161462	0.269104	7.46236	1.15012	6.87806	3.35614	0.372255	3.15292	0.939448	0.948355	2040	55.1375	2095.83	29.7605	2151.1	20.0844	2151.1	20.0844
SR1-Spot 91	92.9717	71539.9	0.781532	5.93226	1.09494	11.1839	3.46167	0.481186	3.28395	0.948658	0.995655	2532.43	68.7756	2538.58	32.2752	2543.48	18.352	2543.48	18.352
SR1-Spot 175	452.822	469518	0.600174	5.78179	1.11184	10.2701	3.64727	0.430663	3.47367	0.952403	0.892614	2308.7	67.4098	2459.42	33.7602	2586.45	18.5573	2586.45	18.5573
SR1-Spot 69	286.176	33035.4	0.26107	5.69962	1.07692	10.542	3.70663	0.435782	3.54674	0.956863	0.893277	2331.73	69.3977	2483.62	34.3888	2610.31	17.9331	2610.31	17.9331
SR1-Spot 19	73.6383	2.19672e+06	0.554033	5.69313	1.05849	10.9577	4.06134	0.452448	3.92098	0.96544	0.921108	2406.13	78.7414	2519.55	37.807	2612.21	17.6228	2612.21	17.6228
SR1-Spot 137	105.534	206762	0.852486	5.50634	1.17969	13.0485	4.16002	0.521103	3.98925	0.95895	1.01359	2703.86	88.1052	2683.17	39.253	2667.61	19.5406	2667.61	19.5406
SR1-Spot 33	126.207	308552	0.533637	5.40145	0.878963	11.759	3.51936	0.460657	3.40783	0.96831	0.904813	2442.46	69.2854	2585.4	32.9457	2699.41	14.5125	2699.41	14.5125
SR1-Spot 284	28.2749	205389	0.444694	5.37567	1.14783	12.9775	5.16614	0.505969	5.03701	0.975005	0.974917	2639.4	109.104	2678.02	48.7406	2707.3	18.9423	2707.3	18.9423
SR1-Spot 234	102.754	123220	0.204892	5.18504	1.22399	13.9447	4.62545	0.524396	4.46057	0.964352	0.982319	2717.8	98.9246	2745.96	43.8507	2766.72	20.0849	2766.72	20.0849
SR1-Spot 154	160	53254.6	0.36225	5.11416	1.08599	14.2573	3.4731	0.528821	3.29895	0.949856	0.981073	2736.48	73.5639	2766.98	32.9655	2789.28	17.7834	2789.28	17.7834
SR1-Spot 98	57.8432	381557	0.501736	4.97823	1.11766	15.5305	3.60369	0.560736	3.426	0.95069	1.01284	2869.67	79.3517	2848.36	34.3909	2833.3	18.2293	2833.3	18.2293
SR1-Spot 314	59.7947	56713.2	0.354831	4.76224	1.19099	16.653	4.6838	0.575177	4.52985	0.967131	1.00813	2929.04	106.638	2915.07	44.8936	2905.42	19.3056	2905.42	19.3056
SR1-Spot 301	57.2583	94771.1	0.89146	3.77512	1.30762	19.6717	4.56479	0.538606	4.37349	0.958093	0.84786	2777.61	98.7015	3075.36	44.1357	3276.03	20.5528	3276.03	20.5528
SR4.1-Spot 37	179.895	42216.2	2.10843	19.6079	2.4981	0.205664	2.84198	0.0292475	1.35512	0.476821	1.0172	185.837	2.48236	189.908	4.92251	240.795	57.5909	185.837	2.48236
SR4.1-Spot 3	174.155	319264	0.906671	20.0366	2.0948	0.208262	2.59468	0.0302645	1.53107	0.590079	0.936979	192.203	2.89932	192.093	4.54114	190.759	48.7313	192.203	2.89932
SR4.2-Spot 98	275.284	40554	0.430246	19.7486	1.75932	0.212425	2.51193	0.0304257	1.79292	0.713763	0.978711	193.212	3.41274	195.586	4.4688	224.315	40.6898	193.212	3.41274
SR4.1-Spot 223	196.293	101053	0.793838	19.2708	2.0182	0.217922	2.44156	0.0304579	1.37408	0.562786	1.01314	193.413	2.61817	200.179	4.4359	280.675	46.1847	193.413	2.61817
SR4.2-Spot 73	220.195	27290.2	0.947591	20.2514	2.03897	0.2079	2.36273	0.0305357	1.19378	0.505252	0.948601	193.9	2.28027	191.789	4.12924	165.857	47.6619	193.9	2.28027
SR4.1-Spot 208	334.528	111280	0.629539	19.3657	2.11006	0.231194	2.5595	0.032472	1.4487	0.566006	1.02849	206.001	2.93715	211.184	4.88021	269.374	48.393	206.001	2.93715
SR4.2-Spot 202	304.596	97223.2	0.41367	19.3153	1.52689	0.237109	1.98206	0.0332162	1.26378	0.637613	0.998811	210.646	2.61908	216.051	3.85735	275.347	34.9626	210.646	2.61908
SR4.1-Spot 82	275.701	125236	0.487499	19.4027	1.76324	0.239043	2.24017	0.0336386	1.38179	0.616824	0.974963	213.281	2.89887	217.636	4.38837	265.035	40.45	213.281	2.89887
SR4.2-Spot 152	230.808	242149	0.382591	19.5063	2.44793	0.237823	2.6774	0.0336455	1.08447	0.405045	0.966963	213.324	2.27557	216.636	5.22325	252.808	56.3015	213.324	2.27557
SR4.2-Spot 65	624.588	54071.3	0.216741	19.7007	1.34015	0.239785	1.90459	0.0342612	1.35332	0.710556	0.856407	217.163	2.88995	218.244	3.74032	229.905	30.9564	217.163	2.88995
SR4.1-Spot 314	216.822	41176.6	0.364636	19.8462	1.72528	0.246304	2.20259	0.0354525	1.36923	0.621647	1.03354	224.584	3.02213	223.569	4.4199	212.882	39.9857	224.584	3.02213
SR4.2-Spot 163	331.684	146088	0.684862	19.109	1.37745	0.288107	1.97742	0.0399292	1.41874	0.717469	0.978464	252.394	3.51161	257.068	4.49089	299.891	31.4355	252.394	3.51161
SR4.1-Spot 230	200.125	179445	1.04041	18.4559	1.83713	0.303055	2.31211	0.0405653	1.40385	0.607172	0.992279	256.336	3.52796	268.784	5.46011	378.654	41.3051	256.336	3.52796
SR4.1-Spot 277	183.638	25826.3	0.424635	19.1359	1.81804	0.315492	2.34033	0.043786	1.47373	0.629711	0.937821	276.258	3.98529	278.429	5.69917	296.688	41.4761	276.258	3.98529
SR4.2-Spot 121	36.2395	29427	1.56858	18.9354	3.9245	0.333752	4.18828	0.0458351	1.46287	0.349277	0.946609	288.901	4.13295	292.426	10.6422	320.709	89.2042	288.901	4.13295
SR4.1-Spot 181	168.144	28813	0.407211	18.9733	1.99226	0.347848	2.34381	0.0478664	1.23464	0.526767	0.991506	301.409	3.63566	303.102	6.14195	316.128	45.3096	301.409	3.63566
SR4.2-Spot 92	542.871	144595	1.41249	19.1605	0.964703	0.358	1.42782	0.0497495	1.05263	0.737226	0.941295	312.984	3.21586	310.721	3.82199	293.776	22.0265	312.984	3.21586
SR4.1-Spot 310	497.692	102046	0.868771	19.2872	1.40757	0.3568	2.17611	0.0499106	1.65958	0.762637	0.977484	313.973	5.08578	309.823	5.81065	278.728	32.2294	313.973	5.08578
SR4.2-Spot 150	292.85	55619.3	0.747139	19.2403	1.65507	0.363466	2.01058	0.0507193	1.14157	0.567781	0.969954	318.936	3.55229	314.799	5.44221	284.289	37.8767	318.936	3.55229
SR4.1-Spot 131	185.53	103691	1.84377	18.5524	1.34859	0.379003	2.08182	0.0509966	1.58596	0.761814	0.94999	320.637	4.96078	326.305	5.80971	366.914	30.3937	320.637	4.96078
SR4.2-Spot 300	271.599	73475.5	0.92594	18.4372	1.19188	0.389929	1.5925	0.0521409	1.05616	0.663209	0.938636	327.652	3.37405	334.318	4.53633	380.933	26.7905	327.652	3.37405
SR4.1-Spot 132	366.279	97231.7	0.602371	18.6802	1.24357	0.390077	2.07992	0.0528484	1.66722	0.801578	1.0488	331.985	5.39482	334.426	5.92644	351.449	28.0952	331.985	5.39482
SR4.1-Spot 31	95.6842	27191.9	0.958927	18.8872	2.01184	0.410555	2.44471	0.0562389	1.38892	0.568134	0.989097	352.712	4.76728	349.275	7.22513	326.461	45.649	352.712	4.76728
SR4.1-Spot 201	452.553	125587	0.22914	18.7739	1.44031	0.418055	2.14989	0.056923	1.5961	0.74241	0.934318	356.885	5.54145	354.66	6.43566	340.139	32.5942	356.885	5.54145
SR4.1-Spot 54	1048.55	108771	0.00760204	18.5146	1.11476	0.43546	1.58616	0.0584738	1.12837	0.711386	1.00639	366.337	4.0184	367.046	4.88583	371.504	25.0896	366.337	4.0184
SR4.2-Spot 38	183.184	25885.4	1.01133	18.1405	2.37092	0.451795	2.64307	0.0594413	1.16814	0.441964	0.990043	372.227	4.22498	378.535	8.35188	417.292	52.9904	372.227	4.22498
SR4.2-Spot 18	316.481	121925	0.1055	18.1633	1.41027	0.45203	1.85475	0.0595471	1.20467	0.649505	0.994268	372.871	4.36443	378.7	5.8629	414.481	31.5208	372.871	4.36443
SR4.2-Spot 31	357.214	68210.3	0.0631778	18.1563	1.46662	0.453939	2.00558	0.0597756	1.36799	0.68209	0.939876	374.26	4.97405	380.034	6.3581	415.34	32.775	374.26	4.97405
SR4.2-Spot 128	356.577	510243	0.161105	18.5194	1.63985	0.446357	2.36715	0.0599526	1.70713	0.721176	0.958244	375.337	6.22454	374.725	7.41771	370.917	36.9326	375.337	6.22454
SR4.1-Spot 32	129.916	30055.8	0.289369	18.3917	1.71589	0.453167	2.22409	0.0604476	1.41504	0.63623	0.973766	378.347	5.19967	379.494	7.04259	386.48	38.5401	378.347	5.19967
SR4.1-Spot 161	199.629	71123.9	0.569738	18.3927	1.34552	0.455051	1.79327	0.0607022	1.1855	0.661083	0.994133	379.895	4.37353	380.81	5.6946	386.357	30.2	379.895	4.37353
SR4.2-Spot 17	581.335	109101	0.704632	18.1866	0.885823	0.462309	1.34078	0.0609792	1.00648	0.75067	1.0031	381.578	3.72906	385.863	4.30411	411.62	19.807	381.578	3.72906
SR4.1-Spot 179	154.862	62394.3	1.52329	17.4788	1.71191	0.482426	2.37645	0.0611564	1.64829	0.693594	0.99945	382.654	6.12371	399.736	7.85281	499.737	37.7239	382.654	6.12371
SR4.2-Spot 126	448.519	376290	0.655968	18.1121	1.46178	0.467263	2.00017	0.0613802	1.36524	0.682563	0.986431	384.014	5.08962	389.296	6.46778	420.785	32.636	384.014	5.08962
SR4.2-Spot 180	256.949	49479.1	1.37805	18.0761	1.42506	0.468235	1.78274	0.0613857	1.07114	0.600841	0.984815	384.047	3.99355	389.969	5.77285	425.224	31.7912	384.047	3.99355
SR4.1-Spot 40	431.349	221508	0.377844	18.4037	1.15609	0.465886	1.58274	0.0621847	1.08098	0.682981	0.987075	388.898	4.07961	388.343	5.10766	385.016	25.9726	388.898	4.07961
SR4.2-Spot 228	462.311	52013	0.0751036	18.3743	1.1862	0.46789	1.86227	0.0623523	1.43562	0.770896	1.02926	389.915	5.43177	389.73	6.02738	388.613	26.6316	389.915	5.43177
SR4.1-Spot 167	140.744	187426	1.19764	17.888	2.23175	0.484055	2.60604	0.0627993	1.34564	0.516353	0.939629	392.627	5.12567	400.851	8.63111	448.514	49.5892	392.627	5.12567
SR4.2-Spot 274	840.819	242361	0.381649	18.0783	1.04585	0.482945	1.99682	0.0633217	1.70103	0.851868	0.998339	395.795	6.53007	400.091	6.60309	424.96	23.332	395.795	6.53007
SR4.1-Spot 291	274.902	121881	0.278973	18.1372	1.43744	0.491048	2.05253	0.064594	1.46514	0.713822	1.02632	403.504	5.73068	405.624	6.8637	417.696	32.1098	403.504	5.73068
SR4.2-Spot 8	201.563	74230.8	0.461692	17.8431	1.93211	0.50271	2.24518	0.0650558	1.14359	0.509351	0.898419	406.299	4.50299	413.535	7.62662	454.141	42.9096	406.299	4.50299
SR4.2-Spot 105	74.5966	31539.2	0.486537	18.2716	2.07683	0.494563	2.59988	0.0655385	1.56402	0.601573	0.98368	409.22	6.20136	408.015	8.73576	401.181	46.5159	409.22	6.20136
SR4.2-Spot 90	130.915	110063	0.294726	17.509	1.89632	0.517835	2.5556	0.0657583	1.7132	0.670373	0.942706	410.55	6.81427	423.704	8.8532	495.939	41.7861	410.55	6.81427
SR4.2-Spot 297	314.202	223815	0.733541	17.7181	1.5316	0.513745	2.22873	0.066018	1.61909	0.726462	0.974918	412.121	6.4638	420.965	7.68054	469.687	33.9265	412.121	6.4638
SR4.1-Spot 239	625.178	173896	0.582871	18.1081	0.996189	0.504028	1.57709	0.0661951	1.22263	0.775243	0.978691	413.191	4.8933	414.425	5.36647	421.28	22.2391	413.191	4.8933
SR4.1-Spot 34	259.584	159345	0.224121	17.968	1.33182	0.508702	1.97938	0.0662921	1.46431	0.739781	0.999004	413.778	5.86863	417.576	6.77682	438.588	29.6425	413.778	5.86863
SR4.1-Spot 81	466.056	752898	0.188229	17.7977	0.873122	0.513806	1.53465	0.0663225	1.26206	0.822379	0.966167	413.962	5.06024	421.005	5.28897	459.782	19.3609	413.962	5.06024
SR4.2-Spot 265	179.241	96003.6	0.143397	17.627	1.53444	0.519154	1.94322	0.0663703	1.19231	0.613573	0.988355	414.251	4.7838	424.586	6.74301	481.074	33.9015	414.251	4.7838
SR4.1-Spot 244	331.729	104460	0.226936	17.3449	2.38754	0.528245	2.84337	0.0664518	1.54415	0.543071	0.963301	414.743	6.20259	430.644	9.97975	516.609	52.4431	414.743	6.20259
SR4.2-Spot 176	417.243	101719	0.630731	17.9926	1.23269	0.509746	2.0639	0.0665192	1.65534	0.802045	0.959876	415.151	6.65556	418.279	7.07581	435.543	27.4711	415.151	6.65556
SR4.1-Spot 213	302.779	223970	1.16903	18.002	1.22857	0.509759	1.76197	0.0665555	1.263	0.716807	0.95291	415.37	5.08067	418.287	6.04077	434.386	27.3637	415.37	5.08067
SR4.1-Spot 281	104.48	100420	0.452308	17.8304	2.0273	0.51504	2.32899	0.066604	1.1464	0.492232	0.942268	415.663	4.6148	421.832	8.0394	455.675	45.0103	415.663	4.6148
SR4.1-Spot 24	178.521	75723.6	0.135938	18.2174	1.49483	0.505818	2.03814	0.0668311	1.38546	0.679767	0.989551	417.036	5.59493	415.633	6.95171	407.834	33.4486	417.036	5.59493
SR4.2-Spot 186	93.9222	36563.4	0.781418	18.0294	2.2411	0.511229	2.54359	0.0668491	1.20305	0.472975	1.04159	417.144	4.85955	419.275	8.73722	430.992	49.948	417.144	4.85955
SR4.2-Spot 166	190.846	50059.1	0.549796	17.9331	1.45488	0.517386	2.05702	0.0672927	1.45418	0.706936	0.900587	419.824	5.91044	423.404	7.12186	442.919	32.3656	419.824	5.91044
SR4.2-Spot 7	152.156	61547.1	0.749726	17.5744	1.74847	0.528743	2.08347	0.0673943	1.13302	0.543811	1.00739	420.438	4.61161	430.975	7.31704	487.688	38.6079	420.438	4.61161
SR4.1-Spot 2	203.867	892772	0.593055	17.9349	1.27143	0.519897	1.63847	0.0676262	1.03346	0.630748	0.996449	421.839	4.21996	425.082	5.69083	442.689	28.2991	421.839	4.21996
SR4.1-Spot 55	467.538	66186.5	0.0738706	17.8119	1.21819	0.525335	1.73627	0.0678649	1.2372	0.712562	0.986855	423.28	5.0686	428.709	6.0719	457.995	27.0273	423.28	5.0686
SR4.1-Spot 48	281.312	70956.5	0.381259	17.5306	1.07548	0.535514	1.70293	0.0680874	1.32034	0.775337	0.969461	424.622	5.42581	435.462	6.03042	493.193	23.7006	424.622	5.42581
SR4.2-Spot 296	167.678	110600	0.390694	17.3003	1.79842	0.542954	2.38782	0.0681265	1.57078	0.657832	0.975055	424.858	6.45845	440.37	8.53202	522.26	39.4345	424.858	6.45845
SR4.2-Spot 257	99.9078	115654	0.830331	17.8183	2.61374	0.527172	2.84513	0.0681266	1.12389	0.395022	0.81649	424.859	4.62099	429.931	9.97263	457.182	57.9921	424.859	4.62099
SR4.2-Spot 80	492.261	172548	0.548428	18.0823	1.52471	0.5198	2.49917	0.0681692	1.98019	0.792337	0.988505	425.116	8.14653	425.018	8.67934	424.462	34.0221	425.116	8.14653
SR4.2-Spot 44	54.1227	21354.8	1.11914	17.7761	2.6107	0.529306	2.92617	0.0682404	1.32165	0.451664	1.00059	425.546	5.4426	431.349	10.2839	462.482	57.8721	425.546	5.4426
SR4.2-Spot 57	326.614	94365.7	0.271658	18.1529	1.17232	0.519167	2.07186	0.0683522	1.70829	0.824522	1.00383	426.221	7.04561	424.595	7.18949	415.757	26.195	426.221	7.04561
SR4.1-Spot 133	214.153	196269	0.0853797	18.018	1.25847	0.523803	1.76416	0.06845	1.23632	0.700801	0.892689	426.811	5.10587	427.689	6.1576	432.4	28.0393	426.811	5.10587
SR4.2-Spot 173	580.646	633412	0.336988	18.0859	0.94893	0.522598	1.64395	0.0685499	1.34242	0.816585	0.944009	427.413	5.55163	426.885	5.72935	424.013	21.1737	427.413	5.55163
SR4.1-Spot 311	287.862	117188	0.495177	17.906	1.24565	0.528428	2.0689	0.0686253	1.65189	0.798436	0.967457	427.868	6.83845	430.766	7.26305	446.273	27.7081	427.868	6.83845
SR4.1-Spot 117	219.318	62648.4	0.494548	17.8722	1.50208	0.529522	2.01778	0.0686376	1.34729	0.667709	1.00428	427.942	5.57841	431.492	7.09315	450.47	33.3833	427.942	5.57841
SR4.2-Spot 216	77.0233	38014.7	0.50426	17.8821	2.29968	0.529579	2.59523	0.0686827	1.20279	0.463463	0.992317	428.215	4.9832	431.53	9.12382	449.247	51.114	428.215	4.9832
SR4.1-Spot 135	478.136	78791.1	0.349023	17.8279	0.990082	0.531525	1.69719	0.0687262	1.37848	0.812211	0.975405	428.477	5.71445	432.821	5.9809	456.006	21.9691	428.477	5.71445
SR4.1-Spot 51	81.2221	31268.7	0.361235	18.1486	1.90155	0.524078	2.453	0.0689821	1.54961	0.631721	1.01113	430.021	6.44625	427.872	8.56498	416.295	42.5095	430.021	6.44625
SR4.2-Spot 205	79.4283	74857.3	0.657877	17.5859	1.74747	0.542728	2.25038	0.0692223	1.41793	0.630086	0.984089	431.469	5.91768	440.221	8.03872	486.256	38.5747	431.469	5.91768
SR4.2-Spot 139	216.254	50598.4	1.12322	17.8184	1.53471	0.539673	2.01331	0.0697428	1.3031	0.647242	0.891418	434.606	5.47665	438.209	7.16555	457.162	34.0474	434.606	5.47665
SR4.1-Spot 94	145.805	69420.1	0.526314	17.6719	1.52596	0.54631	2.04741	0.07002	1.36503	0.666713	0.980647	436.276	5.75827	442.577	7.34488	475.492	33.7598	436.276	5.75827
SR4.1-Spot 279	369.815	153355	0.40791	17.8538	0.984578	0.540836	1.41293	0.0700318	1.0134	0.717233	0.889093	436.347	4.27562	438.975	5.03575	452.76	21.8681	436.347	4.27562
SR4.1-Spot 18	100.019	84115.5	1.15687	17.5463	2.03665	0.553721	2.46926	0.0704651	1.39617	0.565421	0.960722	438.957	5.9246	447.431	8.93565	491.211	44.9234	438.957	5.9246
SR4.1-Spot 296	178.383	36655.5	0.998752	17.769	1.68203	0.547954	2.27174	0.0706165	1.52696	0.672153	0.871651	439.869	6.49259	443.655	8.16553	463.36	37.2976	439.869	6.49259
SR4.2-Spot 181	396.727	188370	1.22416	17.7895	1.32195	0.547687	2.03667	0.0706636	1.54935	0.760726	0.914267	440.152	6.59189	443.481	7.31825	460.766	29.3134	440.152	6.59189
SR4.2-Spot 89	305.088	54877.4	0.462365	17.8319	1.45465	0.546616	2.26084	0.0706933	1.73072	0.76552	0.988082	440.331	7.36646	442.777	8.11352	455.529	32.281	440.331	7.36646
SR4.2-Spot 262	285	112752	0.341209	17.7895	1.65141	0.551494	2.29409	0.0711548	1.59239	0.694125	0.970617	443.109	6.81897	445.975	8.2802	460.763	36.6284	443.109	6.81897
SR4.1-Spot 53	254.026	30474.9	0.913814	17.6684	1.49738	0.561283	1.72539	0.0719246	0.85722	0.496827	0.959356	447.741	3.70787	452.361	6.29829	475.89	33.1142	447.741	3.70787
SR4.1-Spot 151	316.3	47555.8	0.547772	18.0238	1.45049	0.552629	2.17531	0.0722401	1.62113	0.745241	1.00654	449.638	7.04083	446.718	7.86189	431.686	32.331	449.638	7.04083
SR4.2-Spot 37	550.779	160833	0.119993	17.8819	0.937794	0.55916	1.64564	0.0725183	1.35229	0.821738	0.893623	451.31	5.89427	450.979	5.9926	449.274	20.8332	451.31	5.89427
SR4.1-Spot 280	55.7605	44611.7	0.427424	17.5697	2.05908	0.573352	2.5191	0.0730606	1.45123	0.57609	0.987806	454.569	6.36961	460.18	9.32143	488.313	45.4455	454.569	6.36961
SR4.2-Spot 159	421.793	333973	0.812265	17.6985	1.23187	0.57194	1.69632	0.073415	1.16619	0.687482	0.979204	456.697	5.14167	459.269	6.26697	472.141	27.2787	456.697	5.14167
SR4.2-Spot 12	283.228	63044.5	0.117369	17.8471	1.44018	0.567271	1.68199	0.0734272	0.868901	0.516591	0.986141	456.771	3.83154	456.248	6.18166	453.593	31.9891	456.771	3.83154
SR4.1-Spot 73	247.207	52141.3	0.797833	17.7076	1.21242	0.577802	2.05773	0.0742057	1.66262	0.807986	0.993107	461.444	7.40391	463.048	7.65163	471.032	26.8328	461.444	7.40391
SR4.2-Spot 74	78.6643	28338.4	0.552552	17.3044	2.15731	0.591308	2.91218	0.0742111	1.95622	0.671738	0.894795	461.477	8.71197	471.702	10.9882	521.741	47.3535	461.477	8.71197
SR4.2-Spot 162	535.3	387351	0.811009	17.8809	1.07164	0.573022	1.87905	0.0743119	1.5435	0.821429	0.816434	462.081	6.88262	459.967	6.95041	449.4	23.8056	462.081	6.88262
SR4.1-Spot 162	167.495	205023	0.465337	17.2903	1.36332	0.599592	2.22168	0.0751895	1.75419	0.789581	0.923689	467.345	7.90803	476.975	8.45604	523.526	29.8929	467.345	7.90803
SR4.1-Spot 109	209.85	112536	1.03672	17.8066	1.34652	0.590847	1.86924	0.0763051	1.29651	0.693603	0.968676	474.03	5.92534	471.408	7.04935	458.648	29.8716	474.03	5.92534
SR4.2-Spot 111	174.193	37729.3	0.574729	17.4318	1.34786	0.605909	2.03025	0.0766035	1.51828	0.74783	1.02018	475.818	6.96407	480.977	7.77811	505.623	29.6504	475.818	6.96407
SR4.1-Spot 155	98.2314	33408.5	0.816189	17.5845	1.60745	0.606138	2.34827	0.0773039	1.71185	0.728986	0.976868	480.01	7.91859	481.122	8.99865	486.404	35.483	480.01	7.91859
SR4.2-Spot 273	209.508	62534.1	0.35114	17.7362	1.33006	0.607177	1.84207	0.0781044	1.27443	0.691846	1.00788	484.798	5.9518	481.778	7.06633	467.439	29.4635	484.798	5.9518
SR4.2-Spot 260	115.516	41023.9	0.272435	17.4201	1.622	0.62215	2.02737	0.078604	1.21628	0.599931	0.985807	487.785	5.71394	491.194	7.89543	507.102	35.6661	487.785	5.71394
SR4.2-Spot 167	124.077	68786.9	0.414495	17.0762	2.07086	0.642238	2.42571	0.0795402	1.26318	0.520746	0.986964	493.378	5.99972	503.691	9.63255	550.802	45.2141	493.378	5.99972
SR4.2-Spot 135	781.033	211810	0.556959	16.9199	1.20325	0.656388	2.06669	0.0805486	1.68029	0.813036	1.00028	499.397	8.07453	512.402	8.31598	570.83	26.1917	499.397	8.07453
SR4.1-Spot 28	116.847	117288	0.491197	17.308	1.82753	0.645498	2.26348	0.0810288	1.33547	0.590007	0.972423	502.261	6.45288	505.705	9.01602	521.291	40.1035	502.261	6.45288
SR4.1-Spot 114	76.052	130786	0.737864	17.0512	1.87298	0.681328	2.40772	0.0842576	1.51298	0.628384	1.04322	521.486	7.57927	527.577	9.90727	554.01	40.8659	521.486	7.57927
SR4.2-Spot 240	153.136	61508.1	0.350979	16.7459	1.86709	0.699585	2.48758	0.0849667	1.64379	0.660797	0.991433	525.701	8.29844	538.543	10.3973	593.318	40.488	525.701	8.29844
SR4.1-Spot 222	118.819	76131.1	1.25924	16.9565	1.53117	0.701174	2.06247	0.0862307	1.38177	0.669961	1.01991	533.206	7.07123	539.492	8.63187	566.169	33.3282	533.206	7.07123
SR4.2-Spot 161	157.867	35360.9	0.230719	17.017	1.32151	0.700474	1.69691	0.0864518	1.06449	0.627309	1.01593	534.518	5.46038	539.074	7.09771	558.395	28.7978	534.518	5.46038
SR4.2-Spot 238	95.0975	66322.9	0.593499	16.4968	1.7181	0.723966	1.92271	0.0866197	0.863097	0.448896	0.9529	535.514	4.43524	553.006	8.19866	625.681	37.0331	535.514	4.43524
SR4.2-Spot 85	421.94	233960	0.628485	16.4772	1.60294	0.72814	4.26396	0.0870154	3.95119	0.926649	0.989547	537.861	20.3896	555.461	18.2442	628.247	34.5229	537.861	20.3896
SR4.2-Spot 285	45.0023	47378.8	0.923459	16.6117	2.51505	0.729219	2.79349	0.0878556	1.21579	0.435222	0.989251	542.842	6.32958	556.094	11.9621	610.704	54.3659	542.842	6.32958
SR4.2-Spot 32	89.4932	31402.5	0.641207	16.7862	1.63458	0.722868	2.37305	0.0880055	1.72031	0.724939	0.984379	543.73	8.97025	552.359	10.1101	588.085	35.4419	543.73	8.97025
SR4.2-Spot 123	112.375	117450	1.67949	16.7271	1.50419	0.727432	2.1035	0.0882494	1.47041	0.699032	0.975547	545.175	7.68671	555.045	8.99446	595.717	32.5926	545.175	7.68671
SR4.1-Spot 185	1291.97	149056	3.43463	16.6009	1.2064	0.736501	5.18854	0.0886757	5.04634	0.972593	0.934314	547.7	26.4974	560.361	22.3482	612.096	26.0676	547.7	26.4974
SR4.2-Spot 199	123.363	79322.9	0.594225	16.8759	1.62019	0.726088	2.15764	0.0888699	1.42491	0.660402	0.948043	548.85	7.49693	554.254	9.21608	576.497	35.2131	548.85	7.49693
SR4.2-Spot 247	93.381	102372	0.741007	16.6424	1.65222	0.736598	2.18234	0.0889089	1.42574	0.653311	0.978304	549.081	7.50436	560.418	9.39929	606.705	35.7429	549.081	7.50436
SR4.2-Spot 83	383.681	56055.6	0.29446	17.0497	1.09203	0.720553	1.9003	0.0891006	1.55519	0.81839	0.994003	550.216	8.20188	550.994	8.08089	554.202	23.8265	550.216	8.20188
SR4.1-Spot 252	163.058	56819.7	1.63688	16.9416	1.1475	0.733828	1.79701	0.090167	1.38293	0.769573	0.946723	556.525	7.3735	558.798	7.72284	568.087	24.9783	556.525	7.3735
SR4.2-Spot 315	126.432	42657	0.96682	16.1019	1.31782	0.772264	1.49212	0.0901865	0.699824	0.469015	0.957972	556.64	3.73205	581.061	6.602	677.7	28.1472	556.64	3.73205
SR4.1-Spot 219	100.091	32822.1	1.84863	16.5487	1.86883	0.760899	2.24875	0.091325	1.25074	0.556195	0.960507	563.369	6.74717	574.528	9.86681	618.903	40.3381	563.369	6.74717
SR4.1-Spot 202	128.603	106346	1.07232	16.848	1.57883	0.750966	2.59546	0.0917627	2.06003	0.793705	0.997166	565.954	11.1617	568.785	11.3033	580.14	34.2994	565.954	11.1617
SR4.1-Spot 36	67.1817	41837.5	0.579958	17.0614	1.63165	0.743664	2.181	0.0920216	1.44723	0.663563	1.03231	567.482	7.86168	564.541	9.44524	552.711	35.6244	567.482	7.86168
SR4.2-Spot 213	131.27	67874.8	1.45077	16.7808	1.38578	0.760123	1.8073	0.0925116	1.16014	0.641922	0.950479	570.374	6.33287	574.081	7.92519	588.804	30.0613	570.374	6.33287
SR4.2-Spot 197	234.515	63874.3	0.564158	16.6186	1.22927	0.772459	1.67954	0.0931044	1.14445	0.681406	0.934923	573.871	6.28381	581.173	7.43237	609.793	26.5918	573.871	6.28381
SR4.2-Spot 106	223.956	202468	0.698208	16.6154	1.56557	0.775763	1.98974	0.0934844	1.22803	0.617182	0.956224	576.112	6.76793	583.064	8.82637	610.214	33.8596	576.112	6.76793
SR4.2-Spot 164	230.243	44299.4	0.462998	16.8888	1.39806	0.766983	1.92881	0.093947	1.32882	0.688931	0.975516	578.838	7.35649	578.03	8.50126	574.836	30.3985	578.838	7.35649
SR4.2-Spot 114	68.1281	49507.7	0.528189	16.8371	1.82328	0.775198	2.3934	0.0946628	1.55049	0.64782	0.989905	583.055	8.64345	582.741	10.6127	581.5	39.5844	583.055	8.64345
SR4.2-Spot 227	86.4769	32526	1.27516	16.2283	1.77743	0.806395	2.24003	0.0949114	1.36325	0.608587	0.978634	584.519	7.61787	600.43	10.1539	660.968	38.1166	584.519	7.61787
SR4.1-Spot 256	226.847	109473	0.967006	16.6496	1.37236	0.787902	1.73177	0.0951423	1.05625	0.609922	0.80856	585.878	5.91543	589.981	7.74921	605.777	29.7068	585.878	5.91543
SR4.2-Spot 185	414.881	67308.5	0.436147	16.8326	1.05859	0.780035	1.66322	0.0952279	1.28284	0.771302	0.957709	586.382	7.19038	585.503	7.40069	582.081	22.9677	586.382	7.19038
SR4.2-Spot 233	130.032	35770.5	0.570005	16.717	1.41133	0.788456	1.89833	0.0955949	1.26957	0.668781	0.910269	588.542	7.14101	590.295	8.4979	597.064	30.553	588.542	7.14101
SR4.2-Spot 160	190.405	77906	0.442885	16.9205	1.16287	0.778983	1.83553	0.0955959	1.42018	0.773715	1.00054	588.548	7.98824	584.903	8.16127	570.781	25.3076	588.548	7.98824
SR4.2-Spot 277	110.52	55867.5	0.450773	16.4688	1.97982	0.801009	2.62644	0.0956751	1.72583	0.6571	0.973238	589.013	9.71481	597.397	11.8615	629.336	42.6727	589.013	9.71481
SR4.2-Spot 201	241.67	57207.9	0.667213	16.7406	1.31069	0.790152	2.10462	0.0959355	1.64668	0.782408	0.941779	590.545	9.29225	591.258	9.43274	593.983	28.4076	590.545	9.29225
SR4.1-Spot 229	78.0886	44188.4	0.402084	16.6498	2.11784	0.795059	2.38102	0.0960082	1.08812	0.456997	0.994841	590.973	6.14455	594.038	10.7085	605.74	45.8312	590.973	6.14455
SR4.1-Spot 304	259.734	242209	0.346023	16.4472	0.941897	0.805561	1.46516	0.0960924	1.12229	0.765982	0.961894	591.468	6.34257	599.961	6.63756	632.21	20.2936	591.468	6.34257
SR4.1-Spot 69	398.546	248631	0.418022	16.6109	0.74924	0.799605	1.20613	0.0963314	0.945191	0.783657	0.987575	592.874	5.35382	596.606	5.44159	610.797	16.1923	592.874	5.35382
SR4.2-Spot 310	204.357	410709	0.297379	16.4952	1.15168	0.808182	1.72785	0.0966865	1.28807	0.745472	0.998441	594.961	7.32048	601.433	7.84173	625.885	24.8454	594.961	7.32048
SR4.1-Spot 8	306.279	179495	0.301848	16.5618	1.07637	0.80993	1.81695	0.0972867	1.46381	0.805639	1.00333	598.488	8.36633	602.415	8.25597	617.197	23.2471	598.488	8.36633
SR4.2-Spot 220	106.888	27953.3	0.267545	16.5051	1.39523	0.813824	1.74178	0.0974198	1.04267	0.59862	0.850464	599.27	5.96675	604.597	7.93539	624.595	30.0851	599.27	5.96675
SR4.2-Spot 249	41.4059	19440.8	0.777415	16.3705	2.2082	0.821618	2.43382	0.0975505	1.02341	0.420494	0.975622	600.038	5.86371	608.951	11.1468	642.27	47.4965	600.038	5.86371
SR4.1-Spot 174	54.4793	93005.3	0.794632	16.0158	1.91682	0.840759	2.41842	0.0976606	1.47463	0.60975	0.991976	600.684	8.45771	619.564	11.2164	689.134	40.8978	600.684	8.45771
SR4.1-Spot 182	43.0129	26124.2	0.410606	16.584	2.38093	0.813145	3.073	0.0978039	1.94281	0.632219	0.995547	601.526	11.1579	604.217	13.9944	614.301	51.4404	601.526	11.1579
SR4.1-Spot 76	226.499	94886.8	0.883099	16.5133	1.25235	0.817635	1.67057	0.0979244	1.10563	0.661828	0.995415	602.233	6.35691	606.728	7.63054	623.531	27.02	602.233	6.35691
SR4.2-Spot 222	251.975	51374.1	0.741659	16.8511	0.989644	0.803711	1.54688	0.0982261	1.18888	0.768569	0.966533	604.005	6.85477	598.92	6.99885	579.729	21.5007	604.005	6.85477
SR4.1-Spot 218	201.484	78214.5	0.648484	16.4575	1.40423	0.823181	1.92612	0.0982558	1.31836	0.684465	0.997492	604.179	7.60342	609.822	8.83061	630.859	30.2674	604.179	7.60342
SR4.2-Spot 87	205.17	67389.8	0.80066	16.5359	1.15208	0.82243	1.75663	0.0986337	1.32608	0.754897	1.02453	606.397	7.67468	609.403	8.04949	620.574	24.8635	606.397	7.67468
SR4.2-Spot 56	107.148	84385.1	0.947235	16.5729	1.69412	0.822669	2.29091	0.0988831	1.54216	0.673162	0.917682	607.86	8.94576	609.536	10.4996	615.751	36.5914	607.86	8.94576
SR4.2-Spot 146	134.267	80245.5	1.08841	16.1295	1.48505	0.846083	2.15442	0.0989766	1.56082	0.724474	0.949173	608.408	9.06181	622.497	10.0262	674.044	31.7399	608.408	9.06181
SR4.2-Spot 115	129.853	26630.4	0.517161	16.5067	1.24951	0.826992	1.73603	0.0990059	1.20521	0.694233	1.0057	608.58	6.99911	611.942	7.97924	624.383	26.9383	608.58	6.99911
SR4.1-Spot 313	59.8472	27976.2	1.35587	16.7632	1.88866	0.815004	2.4203	0.0990865	1.51355	0.625353	0.9808	609.053	8.79623	605.257	11.0357	591.091	40.9763	609.053	8.79623
SR4.2-Spot 84	170.008	50099	0.0958799	16.6405	1.35802	0.821502	1.79712	0.0991454	1.17704	0.654958	1.02256	609.399	6.84426	608.886	8.22992	606.959	29.3862	609.399	6.84426
SR4.2-Spot 69	177.07	85242.6	1.40231	16.2026	1.25252	0.846036	1.65312	0.0994196	1.07889	0.652639	0.966597	611.007	6.28932	622.471	7.69291	664.392	26.8102	611.007	6.28932
SR4.1-Spot 111	87.4472	88422.9	0.388056	16.2923	1.68779	0.84275	2.2889	0.0995817	1.5461	0.675478	0.998653	611.957	9.02628	620.662	10.6293	652.531	36.2364	611.957	9.02628
SR4.1-Spot 175	113.166	78462.6	0.50197	16.1629	1.68545	0.849838	2.12003	0.0996218	1.28599	0.606591	0.991478	612.192	7.51046	624.56	9.8898	669.599	36.053	612.192	7.51046
SR4.1-Spot 7	181.234	171616	0.349018	16.4134	1.51046	0.839075	1.93889	0.0998843	1.21565	0.626983	1.00053	613.731	7.11667	618.635	8.98245	636.64	32.5159	613.731	7.11667
SR4.2-Spot 142	74.0906	70262.4	0.207369	16.5932	2.04896	0.83193	2.38738	0.100119	1.22528	0.513233	0.802818	615.106	7.18838	614.682	11.0089	613.1	44.2607	615.106	7.18838
SR4.2-Spot 314	76.3515	43573	0.904151	16.4478	2.09557	0.842778	2.32334	0.100535	1.00324	0.43181	1.00348	617.546	5.90797	620.677	10.7894	632.132	45.1415	617.546	5.90797
SR4.1-Spot 215	788.048	365438	0.323321	16.51	0.929189	0.839754	1.55256	0.100554	1.2438	0.80113	0.980945	617.653	7.32581	619.01	7.19576	623.952	20.0579	617.653	7.32581
SR4.2-Spot 86	25.7146	46509.3	1.29729	16.1721	2.74182	0.857744	3.14223	0.100606	1.53495	0.488489	0.984918	617.957	9.04488	628.891	14.7323	668.426	58.7009	617.957	9.04488
SR4.2-Spot 118	176.933	90446.9	0.730497	16.5622	1.10408	0.840006	1.88662	0.100902	1.52982	0.810878	1.00633	619.691	9.03873	619.149	8.74557	617.15	23.8362	619.691	9.03873
SR4.2-Spot 242	176.964	63071.9	0.860387	16.0745	1.40507	0.86698	1.87857	0.101075	1.24692	0.663757	0.981792	620.708	7.37877	633.926	8.85806	681.327	30.015	620.708	7.37877
SR4.1-Spot 212	57.0628	44525.9	0.348371	16.192	2.36025	0.863198	2.77824	0.10137	1.46555	0.527511	0.981911	622.433	8.69555	631.867	13.07	665.759	50.5522	622.433	8.69555
SR4.2-Spot 130	492.861	133148	0.486121	16.4601	1.30302	0.851467	1.85015	0.101648	1.31347	0.709926	0.960681	624.06	7.8126	625.454	8.63973	630.52	28.0695	624.06	7.8126
SR4.2-Spot 245	360.484	50200.4	0.851363	16.5733	1.07388	0.846521	1.77107	0.101752	1.40836	0.795203	0.979647	624.671	8.38481	622.738	8.2444	615.701	23.2105	624.671	8.38481
SR4.1-Spot 269	161.601	154788	0.368036	16.4155	1.66786	0.855421	2.09917	0.101843	1.27467	0.607224	0.97701	625.203	7.59502	627.62	9.82718	636.36	35.9143	625.203	7.59502
SR4.2-Spot 41	157.93	206111	0.576837	16.4214	1.51964	0.855359	2.16469	0.101872	1.54162	0.712167	1.00278	625.373	9.18802	627.586	10.1335	635.592	32.7286	625.373	9.18802
SR4.2-Spot 22	122.878	161514	0.336538	16.401	1.45404	0.856528	1.97481	0.101885	1.33628	0.676664	0.967152	625.448	7.96511	628.226	9.2514	638.259	31.3032	625.448	7.96511
SR4.2-Spot 116	131.022	41732.6	0.671722	16.6694	1.66756	0.843831	2.25921	0.102017	1.52422	0.67467	0.991623	626.22	9.09601	621.258	10.4987	603.203	36.0859	626.22	9.09601
SR4.1-Spot 205	209.378	131270	0.956957	16.3818	1.37834	0.859602	1.97533	0.102131	1.41496	0.716315	1.00904	626.884	8.45253	629.906	9.27171	640.787	29.6537	626.884	8.45253
SR4.2-Spot 60	303.109	161729	0.491103	16.3929	1.38947	0.859896	2.08679	0.102235	1.55693	0.746091	0.950818	627.493	9.30921	630.066	9.79667	639.331	29.8999	627.493	9.30921
SR4.2-Spot 29	20.5418	21389.5	0.588316	15.7604	3.78287	0.89656	4.24041	0.102482	1.91597	0.451837	0.969094	628.936	11.4811	649.887	20.3567	723.332	80.2552	628.936	11.4811
SR4.1-Spot 224	260.518	116177	0.849547	16.2636	1.23921	0.872258	1.8382	0.102887	1.3577	0.738601	0.855327	631.305	8.1649	636.793	8.69587	656.315	26.581	631.305	8.1649
SR4.1-Spot 169	53.1177	55515.3	0.988363	16.4899	1.49553	0.863492	2.26975	0.10327	1.70738	0.752234	0.97421	633.547	10.3025	632.027	10.6796	626.575	32.2574	633.547	10.3025
SR4.1-Spot 195	264.027	100393	0.669473	16.6277	1.29358	0.858287	1.75023	0.103506	1.17897	0.673607	0.982222	634.92	7.1287	629.187	8.20833	608.614	27.9891	634.92	7.1287
SR4.1-Spot 249	117.749	62475.7	0.586522	16.37	1.78419	0.888374	2.29851	0.105473	1.44907	0.63044	0.974064	646.405	8.91255	645.496	10.98	642.338	38.3603	646.405	8.91255
SR4.2-Spot 241	212.337	172192	0.426116	16.1431	1.22305	0.901735	2.0449	0.105576	1.63883	0.801423	1.00354	647.004	10.0886	652.654	9.84564	672.261	26.1576	647.004	10.0886
SR4.1-Spot 307	121.098	79717.9	0.276716	16.4761	1.49972	0.886099	2.35055	0.105885	1.80995	0.770011	0.958753	648.808	11.1715	644.271	11.2133	628.381	32.3246	648.808	11.1715
SR4.2-Spot 78	133.197	60557.3	0.944742	16.1254	1.1504	0.908341	1.75044	0.106233	1.31933	0.753714	0.838534	650.831	8.16739	656.175	8.46019	674.588	24.6156	650.831	8.16739
SR4.2-Spot 95	126.268	62088.1	0.673402	16.191	1.35979	0.909006	1.98751	0.106743	1.44953	0.729322	0.982468	653.805	9.01238	656.529	9.60972	665.901	29.1083	653.805	9.01238
SR4.1-Spot 118	75.0495	53957.7	0.296232	15.86	1.78184	0.946827	2.26662	0.108911	1.40094	0.618072	0.955587	666.423	8.8698	676.449	11.1936	709.991	37.8652	666.423	8.8698
SR4.1-Spot 236	73.2205	50776.2	0.404537	15.7104	1.77061	0.961265	2.23069	0.109529	1.35681	0.608245	0.96528	670.011	8.6343	683.951	11.1018	730.112	37.5228	670.011	8.6343
SR4.2-Spot 188	219.965	239820	0.420063	16.1298	1.24483	0.943403	1.94662	0.110363	1.49657	0.768804	0.983633	674.858	9.58904	674.662	9.59528	673.997	26.6034	674.858	9.58904
SR4.2-Spot 35	610.706	209755	0.134052	15.9609	1.13585	0.956187	1.90118	0.110688	1.52457	0.80191	1.00038	676.741	9.79431	681.319	9.4362	696.452	24.1824	676.741	9.79431
SR4.1-Spot 108	282.02	201754	0.413739	15.2501	1.03573	1.00417	1.99238	0.111066	1.70201	0.854259	1.00728	678.934	10.9678	705.927	10.1365	792.77	21.7468	678.934	10.9678
SR4.1-Spot 67	82.0659	65895.8	0.00175548	16.1883	1.5492	0.947676	2.48116	0.111265	1.93807	0.781115	0.958669	680.093	12.5092	676.892	12.2588	666.274	33.1548	680.093	12.5092
SR4.2-Spot 272	198.626	72660.6	0.338156	16.1292	1.31808	0.958323	1.74443	0.112105	1.14266	0.655037	0.90905	684.961	7.42533	682.427	8.66803	674.068	28.1893	684.961	7.42533
SR4.1-Spot 158	155.299	189429	0.376215	14.8917	1.70787	1.04264	2.52718	0.11261	1.86274	0.737083	0.94851	687.889	12.1536	725.231	13.0988	842.495	35.5551	687.889	12.1536
SR4.1-Spot 14	95.5684	52020.9	0.262393	15.6748	1.13565	0.998013	1.79681	0.113459	1.39241	0.774936	0.986552	692.804	9.14639	702.8	9.11341	734.91	24.0452	692.804	9.14639
SR4.1-Spot 217	620.731	166956	0.19221	14.6479	1.02829	1.09419	1.55535	0.116242	1.16693	0.75027	0.963749	708.898	7.83373	750.535	8.25169	876.741	21.2767	708.898	7.83373
SR4.1-Spot 237	88.007	202365	0.677753	15.4505	1.75695	1.06446	2.1745	0.11928	1.28125	0.589215	0.963495	726.42	8.802	736.017	11.3849	765.319	37.0014	726.42	8.802
SR4.1-Spot 52	212.384	64154	0.534324	15.5306	1.08105	1.08951	1.75181	0.122721	1.37846	0.786881	0.930895	746.204	9.71315	748.266	9.27503	754.419	22.7977	746.204	9.71315
SR4.2-Spot 113	398.364	220729	0.667985	15.2262	0.97981	1.12914	1.5957	0.124692	1.25945	0.789281	0.912193	757.512	9.00129	767.344	8.5928	796.059	20.5636	757.512	9.00129
SR4.1-Spot 260	121.096	51569.7	0.485522	14.5041	1.27462	1.2017	1.96959	0.126411	1.50154	0.762363	0.99103	767.356	10.8628	801.369	10.9159	897.149	26.3184	767.356	10.8628
SR4.1-Spot 276	171.482	701895	0.131248	14.5722	1.35408	1.2614	2.54708	0.133315	2.15733	0.846982	1.00217	806.748	16.3592	828.537	14.427	887.462	28.0018	806.748	16.3592
SR4.2-Spot 217	129.967	227512	0.345116	14.7342	1.32176	1.29922	1.85315	0.138838	1.29888	0.700906	0.989469	838.086	10.2078	845.378	10.6331	864.589	27.4108	838.086	10.2078
SR4.1-Spot 134	54.8531	48453.2	0.318368	14.267	1.8131	1.54886	2.75304	0.160268	2.07169	0.752509	0.986526	958.264	18.4472	950.041	16.9883	931.018	37.2366	931.018	37.2366
SR4.1-Spot 198	40.3676	33754.2	0.226	14.1364	1.55655	1.57505	2.07414	0.161485	1.37084	0.660921	0.988672	965.023	12.2864	960.42	12.8825	949.891	31.857	949.891	31.857
SR4.1-Spot 89	300.934	93320.8	0.3239	14.0293	1.13991	1.58585	1.91558	0.16136	1.5395	0.803672	0.991662	964.331	13.7888	964.67	11.9291	965.463	23.2666	965.463	23.2666
SR4.1-Spot 102	44.8727	137471	0.351907	14.025	1.3425	1.50181	2.0538	0.152762	1.55428	0.756781	0.98954	916.429	13.2777	931.121	12.519	966.085	27.4068	966.085	27.4068
SR4.2-Spot 203	92.8642	61624.6	0.332275	13.988	1.41071	1.53905	2.05897	0.156137	1.49975	0.728399	0.980514	935.275	13.0568	946.123	12.6731	971.464	28.7662	971.464	28.7662
SR4.1-Spot 50	350.481	55262.2	0.126265	13.9287	0.970562	1.62626	1.59112	0.164285	1.26083	0.792413	0.96243	980.547	11.4687	980.415	10.0046	980.1	19.7519	980.1	19.7519
SR4.2-Spot 229	75.2263	54041.1	0.460765	13.9268	1.42962	1.56513	1.90072	0.158089	1.25257	0.658999	0.966022	946.149	11.0226	956.501	11.7763	980.366	29.1212	980.366	29.1212
SR4.2-Spot 30	207.578	98898.3	1.10269	13.9182	1.04103	1.62831	1.9173	0.164369	1.61007	0.839756	0.986591	981.01	14.6518	981.208	12.0615	981.669	21.1819	981.669	21.1819
SR4.2-Spot 258	709.293	189743	0.0219151	13.8992	0.909752	1.64186	1.62872	0.16551	1.35095	0.829458	1.01271	987.326	12.3671	986.428	10.2782	984.41	18.5008	984.41	18.5008
SR4.2-Spot 75	72.475	31877.6	0.605293	13.8626	1.20036	1.6069	1.71333	0.161559	1.22255	0.713553	1.00386	965.436	10.9617	972.901	10.7239	989.777	24.3978	989.777	24.3978
SR4.1-Spot 191	32.2165	46474.7	1.68048	13.8431	1.98983	1.63274	2.49743	0.163926	1.50921	0.604306	0.990068	978.558	13.7022	982.915	15.7277	992.647	40.4565	992.647	40.4565
SR4.1-Spot 97	225.15	94098.8	0.305161	13.8411	1.03715	1.51298	1.56778	0.151881	1.1757	0.749911	0.949302	911.498	9.99333	935.645	9.58459	992.961	21.0861	992.961	21.0861
SR4.1-Spot 146	461.708	72125	0.169935	13.8372	1.04861	1.59482	1.66459	0.160052	1.29278	0.776635	0.988736	957.065	11.4981	968.187	10.3886	993.527	21.3175	993.527	21.3175
SR4.2-Spot 97	84.1574	49915.7	0.565566	13.8242	1.24947	1.60799	1.85326	0.161221	1.36872	0.738548	0.991413	963.56	12.2501	973.326	11.6028	995.452	25.3876	995.452	25.3876
SR4.2-Spot 52	182.429	298285	0.37392	13.7935	1.15262	1.6436	1.54289	0.164426	1.02566	0.664766	0.994154	981.327	9.33641	987.098	9.74042	999.931	23.3977	999.931	23.3977
SR4.1-Spot 297	190.368	88911.1	0.729768	13.767	1.3955	1.66705	1.98782	0.166451	1.41564	0.712155	0.975219	992.529	13.0224	996.064	12.6168	1003.84	28.3251	1003.84	28.3251
SR4.1-Spot 312	77.1582	130293	0.307746	13.7619	1.13697	1.74548	2.06953	0.174217	1.72924	0.83557	0.940813	1035.31	16.5393	1025.49	13.3605	1004.59	23.0553	1004.59	23.0553
SR4.1-Spot 46	1140.58	107079	0.144977	13.7562	0.905438	1.3468	1.64445	0.134369	1.37274	0.834768	0.994274	812.741	10.4821	866.174	9.58275	1005.43	18.3679	1005.43	18.3679
SR4.2-Spot 141	192.942	155258	0.425521	13.7128	1.04311	1.73279	1.58471	0.172333	1.193	0.752816	0.991255	1024.95	11.3051	1020.79	10.2032	1011.84	21.1274	1011.84	21.1274
SR4.1-Spot 315	105.613	39863	0.285027	13.7013	1.4633	1.73685	2.20418	0.172593	1.64838	0.747843	0.975736	1026.38	15.6406	1022.3	14.2042	1013.53	29.649	1013.53	29.649
SR4.2-Spot 143	43.3466	45676.3	0.482793	13.6727	1.63098	1.74337	2.22219	0.17288	1.50931	0.6792	0.935556	1027.96	14.3413	1024.71	14.3399	1017.77	33.0344	1017.77	33.0344
SR4.1-Spot 150	198.54	88441.5	0.242259	13.6511	0.958634	1.71374	1.67294	0.169672	1.37104	0.819539	0.961377	1010.31	12.8208	1013.68	10.7276	1020.97	19.4071	1020.97	19.4071
SR4.2-Spot 256	480.736	85930.6	0.130436	13.6477	0.945156	1.73034	1.57938	0.171274	1.26536	0.801173	0.966782	1019.13	11.9279	1019.88	10.1636	1021.48	19.1331	1021.48	19.1331
SR4.1-Spot 178	62.7299	111906	0.391054	13.6324	1.66763	1.66451	2.27364	0.164573	1.54546	0.67973	1.03251	982.139	14.0789	995.096	14.4228	1023.75	33.7467	1023.75	33.7467
SR4.2-Spot 4	95.5259	36974.2	0.245647	13.6181	1.44132	1.68348	2.03059	0.166273	1.43034	0.704399	1.00443	991.543	13.1456	1002.3	12.9355	1025.87	29.1767	1025.87	29.1767
SR4.2-Spot 25	443.553	466142	0.287407	13.6085	0.803282	1.70167	1.41703	0.167952	1.16736	0.823803	0.972959	1000.82	10.8214	1009.16	9.06285	1027.3	16.2456	1027.3	16.2456
SR4.1-Spot 12	633.114	147130	0.249263	13.6017	0.996848	1.73244	1.74493	0.170904	1.43215	0.820753	0.996503	1017.09	13.4753	1020.66	11.234	1028.3	20.1767	1028.3	20.1767
SR4.2-Spot 182	1095.5	313837	0.137161	13.599	0.896676	1.79579	1.50202	0.177117	1.20501	0.802256	1.00697	1051.21	11.6882	1043.93	9.79649	1028.71	18.1498	1028.71	18.1498
SR4.1-Spot 60	88.4593	27878.7	0.346143	13.5967	1.24757	1.75364	1.77054	0.172931	1.25633	0.709578	0.958759	1028.24	11.9405	1028.51	11.4495	1029.05	25.2444	1029.05	25.2444
SR4.1-Spot 45	180.209	231647	0.587535	13.594	1.28969	1.74984	1.7359	0.172522	1.16191	0.669341	1.03057	1025.99	11.0208	1027.1	11.2166	1029.45	26.0946	1029.45	26.0946
SR4.1-Spot 115	78.2966	131503	0.262652	13.5933	1.40695	1.71379	2.09884	0.168959	1.55744	0.742049	1.03039	1006.37	14.5115	1013.7	13.4591	1029.56	28.4645	1029.56	28.4645
SR4.2-Spot 156	205.956	89268.6	0.442244	13.5834	1.0097	1.68845	1.58296	0.166339	1.21912	0.770153	0.987782	991.91	11.2082	1004.18	10.0948	1031.04	20.4277	1031.04	20.4277
SR4.1-Spot 225	625.783	109047	0.379525	13.5737	0.703164	1.74075	1.67904	0.171369	1.52471	0.908084	1.01268	1019.65	14.3796	1023.74	10.8287	1032.48	14.2292	1032.48	14.2292
SR4.1-Spot 263	236.536	197036	0.170802	13.5636	0.893043	1.71899	1.72282	0.169101	1.47329	0.855162	0.991642	1007.16	13.7373	1015.65	11.0599	1033.97	18.063	1033.97	18.063
SR4.2-Spot 104	221.142	102634	0.158826	13.5632	0.987406	1.73315	1.57873	0.17049	1.23183	0.780269	0.807127	1014.81	11.5665	1020.92	10.1654	1034.03	19.9688	1034.03	19.9688
SR4.1-Spot 22	202.294	400231	0.825388	13.5543	1.11319	1.77337	1.87712	0.174331	1.51142	0.805181	0.943432	1035.93	14.464	1035.76	12.1881	1035.37	22.5056	1035.37	22.5056
SR4.2-Spot 2	88.2119	164424	1.68521	13.5463	1.78759	1.73385	2.36674	0.170346	1.55112	0.655381	0.903984	1014.02	14.5539	1021.18	15.2423	1036.56	36.1245	1036.56	36.1245
SR4.2-Spot 286	134.507	4.2547e+07	0.557433	13.5315	1.05848	1.60201	1.59682	0.157221	1.1956	0.748738	1.02673	941.316	10.4713	970.995	9.98291	1038.76	21.3892	1038.76	21.3892
SR4.1-Spot 47	207.469	79761.9	0.242313	13.5255	1.00528	1.78447	1.57531	0.17505	1.21285	0.769914	1.00006	1039.87	11.6475	1039.81	10.2513	1039.66	20.3132	1039.66	20.3132
SR4.2-Spot 9	975.9	135192	0.157954	13.5099	1.12484	1.79562	1.85181	0.175941	1.47103	0.794375	1.00909	1044.76	14.188	1043.87	12.0777	1041.98	22.7194	1041.98	22.7194
SR4.1-Spot 65	913.742	151392	0.0210885	13.5032	0.844698	1.74906	1.38746	0.171293	1.10069	0.793317	1.0025	1019.23	10.3767	1026.81	8.96358	1042.99	17.0626	1042.99	17.0626
SR4.2-Spot 1	711.331	184030	0.119103	13.5007	1.0581	1.66126	1.81335	0.162665	1.47265	0.812112	0.93909	971.568	13.2818	993.856	11.4943	1043.36	21.3677	1043.36	21.3677
SR4.1-Spot 71	155.153	98705.5	0.398132	13.5006	1.31311	1.83014	1.87543	0.179199	1.33903	0.713984	1.00593	1062.6	13.1177	1056.33	12.3148	1043.38	26.5119	1043.38	26.5119
SR4.1-Spot 243	27.1038	38293.5	0.783767	13.4951	2.13267	1.79758	2.5761	0.175939	1.445	0.560925	1.03896	1044.75	13.9368	1044.58	16.8088	1044.2	43.0258	1044.2	43.0258
SR4.1-Spot 140	123.404	51325.7	0.188327	13.4937	0.984818	1.74841	1.6423	0.171109	1.31426	0.800257	1.03888	1018.22	12.3787	1026.58	10.6087	1044.41	19.8848	1044.41	19.8848
SR4.2-Spot 194	1020.58	143706	0.403654	13.4905	1.04903	1.82192	1.85498	0.178261	1.52986	0.824732	1.00155	1057.47	14.9206	1053.38	12.1611	1044.88	21.1783	1044.88	21.1783
SR4.1-Spot 233	151.334	196185	0.379716	13.4749	1.5001	1.80007	2.2479	0.175919	1.67414	0.744757	0.996639	1044.64	16.1452	1045.48	14.6743	1047.27	30.2506	1047.27	30.2506
SR4.2-Spot 254	99.8033	187116	0.347254	13.4655	0.931011	1.84665	1.56572	0.180345	1.25885	0.804006	0.808351	1068.86	12.3991	1062.23	10.3136	1048.66	18.7874	1048.66	18.7874
SR4.1-Spot 189	166.283	58881.2	0.223411	13.4608	1.23548	1.85044	1.95847	0.180653	1.5196	0.775914	1.00021	1070.54	14.989	1063.59	12.9102	1049.37	24.9234	1049.37	24.9234
SR4.2-Spot 108	984.601	102950	0.0403304	13.4562	0.906746	1.63142	1.57579	0.159216	1.28877	0.817857	0.860965	952.416	11.4108	982.407	9.92016	1050.07	18.295	1050.07	18.295
SR4.1-Spot 39	58.2656	46604.4	1.32313	13.4472	1.47515	1.82137	2.16245	0.177634	1.58118	0.731197	1.00258	1054.04	15.375	1053.18	14.1756	1051.41	29.7296	1051.41	29.7296
SR4.2-Spot 226	350.251	221099	0.0311422	13.4369	1.05558	1.81493	1.90366	0.176872	1.58419	0.832184	0.920176	1049.86	15.3481	1050.86	12.4633	1052.95	21.2862	1052.95	21.2862
SR4.2-Spot 299	880.812	65623.6	0.168794	13.4297	1.11023	1.67723	1.66021	0.163364	1.23438	0.743508	1.00046	975.446	11.174	999.931	10.5613	1054.03	22.3839	1054.03	22.3839
SR4.2-Spot 117	123.106	202460	0.44543	13.405	1.40017	1.87534	1.8261	0.182324	1.17225	0.641943	1.03297	1079.66	11.6533	1072.42	12.0939	1057.74	28.1959	1057.74	28.1959
SR4.2-Spot 94	91.84	191961	0.338315	13.3909	1.40561	1.89696	2.0591	0.184233	1.50471	0.73076	0.98911	1090.06	15.0904	1080.02	13.6914	1059.85	28.301	1059.85	28.301
SR4.2-Spot 77	240.879	86588.9	0.227618	13.3745	1.01566	1.80546	1.84143	0.175132	1.536	0.834135	0.940849	1040.32	14.7567	1047.44	12.0334	1062.32	20.4471	1062.32	20.4471
SR4.1-Spot 214	154.251	137893	0.411905	13.3721	0.946027	1.79891	1.49905	0.174465	1.16283	0.775713	0.991963	1036.66	11.1353	1045.06	9.78315	1062.68	19.051	1062.68	19.051
SR4.2-Spot 275	244.642	206846	0.406769	13.3718	0.896371	1.86155	1.55247	0.180536	1.26755	0.816474	0.924201	1069.9	12.4959	1067.54	10.2552	1062.73	18.0467	1062.73	18.0467
SR4.2-Spot 230	143.734	62752	0.594519	13.3687	1.15673	1.80337	1.75984	0.174852	1.32629	0.753639	0.988456	1038.79	12.7246	1046.68	11.4955	1063.2	23.2772	1063.2	23.2772
SR4.1-Spot 4	58.0138	39733.6	0.280327	13.3513	1.37112	1.7346	1.98893	0.167966	1.44078	0.724402	0.985125	1000.9	13.357	1021.46	12.8109	1065.82	27.5892	1065.82	27.5892
SR4.2-Spot 218	166.082	380186	0.88857	13.3466	1.07424	1.80078	1.96746	0.174313	1.6483	0.837781	0.953506	1035.83	15.7725	1045.74	12.8452	1066.52	21.5802	1066.52	21.5802
SR4.2-Spot 191	84.4399	38941.2	0.140916	13.3462	1.19917	1.80431	1.8442	0.17465	1.40109	0.759728	1.00438	1037.68	13.429	1047.02	12.0488	1066.58	24.1106	1066.58	24.1106
SR4.2-Spot 127	171.356	217648	0.458121	13.3397	1.17566	1.86348	1.69262	0.180289	1.21769	0.719412	0.99921	1068.55	11.9904	1068.22	11.185	1067.57	23.6349	1067.57	23.6349
SR4.1-Spot 44	144.088	127191	0.941197	13.3351	1.13963	1.8667	1.64877	0.180538	1.1915	0.722661	0.979896	1069.91	11.7463	1069.36	10.9018	1068.25	22.8885	1068.25	22.8885
SR4.2-Spot 313	183.794	65887.6	0.422401	13.3347	1.32186	1.77795	1.73065	0.17195	1.11706	0.645457	0.9999	1022.85	10.5655	1037.43	11.2474	1068.31	26.5895	1068.31	26.5895
SR4.1-Spot 107	53.5383	122289	0.0244665	13.3197	1.42929	1.80323	1.90707	0.174199	1.26255	0.662039	0.964833	1035.2	12.0746	1046.63	12.4569	1070.57	28.7352	1070.57	28.7352
SR4.2-Spot 21	99.524	122000	0.245564	13.313	1.08299	1.76699	1.69827	0.170612	1.30816	0.770286	1.02732	1015.48	12.2907	1033.42	11.0124	1071.58	21.7579	1071.58	21.7579
SR4.2-Spot 101	193.543	119132	0.328844	13.3098	1.02519	1.89539	1.56051	0.182965	1.17651	0.753926	0.977221	1083.15	11.7303	1079.47	10.373	1072.07	20.5764	1072.07	20.5764
SR4.2-Spot 224	53.6337	217972	0.953406	13.2997	1.74014	1.7662	1.99351	0.170365	0.97263	0.487899	0.908423	1014.12	9.12695	1033.13	12.9249	1073.6	34.9504	1073.6	34.9504
SR4.2-Spot 59	24.2757	38647.2	1.22205	13.2983	2.51665	1.87254	2.99738	0.180603	1.62812	0.543179	1.02074	1070.27	16.0556	1071.43	19.8423	1073.81	50.5491	1073.81	50.5491
SR4.1-Spot 130	130.11	44193.6	0.290545	13.2853	1.29858	1.88369	1.93318	0.181502	1.43208	0.740793	0.970655	1075.17	14.1819	1075.36	12.8229	1075.77	26.0726	1075.77	26.0726
SR4.2-Spot 133	148.423	446461	0.992633	13.2671	1.18405	1.88271	1.85195	0.181158	1.42398	0.768912	0.964016	1073.3	14.079	1075.02	12.2818	1078.49	23.7628	1078.49	23.7628
SR4.1-Spot 190	170.657	155295	0.463983	13.2503	0.972898	1.91616	1.75625	0.184143	1.46215	0.832541	1.0366	1089.57	14.6576	1086.73	11.7181	1081.05	19.5037	1081.05	19.5037
SR4.1-Spot 126	83.6592	141918	0.568849	13.2472	1.34224	1.77769	1.87895	0.170797	1.31486	0.699783	1.01842	1016.5	12.365	1037.34	12.2106	1081.53	26.9072	1081.53	26.9072
SR4.1-Spot 309	330.903	85069.9	0.236083	13.2344	1.12808	1.85083	1.90113	0.177652	1.53027	0.804926	0.990555	1054.13	14.8813	1063.72	12.5331	1083.43	22.6152	1083.43	22.6152
SR4.2-Spot 82	197.472	177011	0.191978	13.2259	1.25891	1.8795	1.93982	0.180288	1.47583	0.760804	0.979646	1068.55	14.5323	1073.89	12.857	1084.76	25.2234	1084.76	25.2234
SR4.1-Spot 262	43.5925	44959.7	0.739337	13.2231	1.49898	1.87481	2.09884	0.1798	1.46907	0.699946	1.00032	1065.88	14.4325	1072.23	13.899	1085.17	30.0361	1085.17	30.0361
SR4.2-Spot 292	349.038	426261	0.25291	13.2163	0.979818	1.88866	1.79356	0.181035	1.50227	0.837592	0.965844	1072.63	14.8446	1077.11	11.9076	1086.18	19.6305	1086.18	19.6305
SR4.2-Spot 154	120.185	129566	0.534324	13.214	1.23107	1.88784	1.72977	0.180925	1.21514	0.702487	0.973992	1072.03	12.0012	1076.82	11.4823	1086.54	24.6586	1086.54	24.6586
SR4.2-Spot 284	566.031	240676	0.00841979	13.2044	0.893042	1.74546	1.64967	0.167158	1.38704	0.8408	0.998319	996.436	12.8058	1025.48	10.6497	1088.02	17.8963	1088.02	17.8963
SR4.1-Spot 210	74.6679	57362.3	0.665606	13.2023	1.48737	1.98836	2.00235	0.19039	1.34057	0.669499	0.974534	1123.49	13.8217	1111.56	13.5287	1088.32	29.8083	1088.32	29.8083
SR4.2-Spot 26	42.0002	28713.7	0.257096	13.1905	1.6293	1.92592	2.55843	0.184246	1.97255	0.771	0.969687	1090.13	19.7835	1090.12	17.1009	1090.14	32.6358	1090.14	32.6358
SR4.1-Spot 220	279.383	224806	0.600521	13.1865	1.08368	1.87166	1.71974	0.179001	1.33535	0.776482	0.95041	1061.51	13.0694	1071.12	11.3817	1090.7	21.6902	1090.7	21.6902
SR4.1-Spot 66	23.7203	114797	1.29349	13.1764	1.94673	1.74117	2.50998	0.166394	1.58438	0.631232	0.900344	992.213	14.5704	1023.9	16.1898	1092.24	38.9807	1092.24	38.9807
SR4.2-Spot 155	71.5997	48344.5	0.603217	13.1726	1.29522	1.9094	1.87644	0.182418	1.35773	0.723566	0.99612	1080.17	13.5029	1084.38	12.5049	1092.82	25.939	1092.82	25.939
SR4.2-Spot 269	53.7329	33846.2	0.633797	13.1705	1.27616	1.84847	1.95588	0.176569	1.48219	0.75781	0.927073	1048.2	14.339	1062.88	12.8883	1093.13	25.5558	1093.13	25.5558
SR4.2-Spot 147	72.8037	110596	0.834061	13.1651	1.48962	1.98107	2.03429	0.189157	1.38541	0.681029	1.00603	1116.81	14.2063	1109.09	13.7276	1093.99	29.8097	1093.99	29.8097
SR4.2-Spot 236	91.9665	108228	0.853721	13.1409	1.36057	1.86645	1.96466	0.177886	1.4173	0.721396	1.01295	1055.41	13.7981	1069.27	12.9901	1097.66	27.217	1097.66	27.217
SR4.1-Spot 143	90.3759	133039	0.27665	13.1276	1.19493	1.88192	1.76967	0.179179	1.30532	0.737609	0.990418	1062.49	12.7863	1074.74	11.7344	1099.69	23.9053	1099.69	23.9053
SR4.2-Spot 122	398.292	56606.1	0.398715	13.1219	0.91115	1.99106	1.70232	0.189488	1.43795	0.844701	1.01215	1118.6	14.7667	1112.48	11.5067	1100.57	18.2259	1100.57	18.2259
SR4.2-Spot 266	415.689	88434.6	0.106139	13.121	1.18822	1.883	1.74884	0.17919	1.28319	0.733737	0.998828	1062.55	12.5701	1075.12	11.5986	1100.68	23.769	1100.68	23.769
SR4.2-Spot 305	546.003	55699.7	0.0424563	13.0726	0.83005	1.82888	1.51243	0.173398	1.2643	0.83594	1.03113	1030.81	12.0439	1055.88	9.9286	1108.06	16.5895	1108.06	16.5895
SR4.2-Spot 200	189.632	188961	0.287465	13.066	1.39928	1.99302	1.85268	0.188866	1.21426	0.655406	0.980133	1115.23	12.4351	1113.15	12.5272	1109.07	27.9729	1109.07	27.9729
SR4.1-Spot 92	164.529	106146	0.317769	13.0562	1.05474	1.97964	1.54683	0.187457	1.13146	0.731473	0.997316	1107.59	11.5144	1108.6	10.4354	1110.57	21.0666	1110.57	21.0666
SR4.2-Spot 136	114.146	44392.5	0.223303	13.0362	1.36234	1.74621	1.97923	0.1651	1.43576	0.725412	0.981687	985.056	13.1155	1025.76	12.7794	1113.62	27.2068	1113.62	27.2068
SR4.1-Spot 121	27.3295	61120.5	0.567108	13.027	1.65938	2.01252	2.26815	0.190145	1.54628	0.681733	0.917526	1122.16	15.9254	1119.74	15.3867	1115.03	33.1185	1115.03	33.1185
SR4.1-Spot 100	97.621	89787.6	0.51122	13.0024	1.1429	1.96332	1.83218	0.185146	1.43201	0.781588	0.94788	1095.02	14.4214	1103.02	12.3263	1118.84	22.8017	1118.84	22.8017
SR4.1-Spot 5	187.609	123732	0.515961	12.9917	1.2421	1.84074	1.62495	0.173443	1.04768	0.644747	0.933262	1031.05	9.98255	1060.13	10.6917	1120.49	24.7804	1120.49	24.7804
SR4.1-Spot 137	287.965	106506	0.311633	12.9823	0.92693	2.07701	1.39532	0.195564	1.04294	0.747455	0.917959	1151.45	10.9975	1141.25	9.56371	1121.91	18.4799	1121.91	18.4799
SR4.2-Spot 279	506.403	58033.6	0.0533238	12.9638	0.882439	1.9425	1.45713	0.182638	1.15953	0.795768	0.948345	1081.37	11.5436	1095.86	9.76754	1124.73	17.5914	1124.73	17.5914
SR4.1-Spot 106	57.207	29019.9	0.64175	12.9567	1.92311	1.97538	2.30634	0.185628	1.27313	0.552013	0.965165	1097.65	12.8495	1107.15	15.5488	1125.84	38.3099	1125.84	38.3099
SR4.1-Spot 58	78.5124	133769	0.22542	12.9532	1.2383	1.92975	1.87409	0.181291	1.40672	0.750611	0.931194	1074.02	13.917	1091.45	12.5347	1126.4	24.6578	1126.4	24.6578
SR4.1-Spot 119	269.327	202057	0.331866	12.9502	1.0992	2.14226	2.09546	0.201209	1.78401	0.851371	1.01034	1181.81	19.264	1162.55	14.5067	1126.83	21.922	1126.83	21.922
SR4.2-Spot 276	98.969	79062	0.498542	12.9291	1.504	1.93365	2.14361	0.181319	1.52743	0.71255	0.986527	1074.18	15.1132	1092.8	14.3474	1130.11	29.9498	1130.11	29.9498
SR4.1-Spot 122	149.823	164406	0.182855	12.9225	1.09629	2.02428	1.70358	0.189722	1.30397	0.765426	0.958243	1119.87	13.4047	1123.7	11.5787	1131.13	21.8318	1131.13	21.8318
SR4.2-Spot 259	132.696	112638	0.515127	12.8989	1.06952	2.04183	1.49952	0.191016	1.05105	0.700923	0.981413	1126.88	10.8666	1129.57	10.2207	1134.74	21.2867	1134.74	21.2867
SR4.2-Spot 91	248.706	116733	1.60932	12.8979	1.04292	1.89115	1.63368	0.176906	1.25747	0.769716	1.02004	1050.05	12.1848	1077.99	10.851	1134.89	20.7562	1134.89	20.7562
SR4.2-Spot 281	23.5886	52662.8	0.42116	12.8881	2.12556	2.07634	2.50822	0.194082	1.33159	0.530891	0.944114	1143.45	13.9521	1141.03	17.191	1136.44	42.2975	1136.44	42.2975
SR4.1-Spot 300	127.199	99053.8	0.302893	12.8847	1.34053	1.93149	1.88832	0.180495	1.32995	0.704299	0.907007	1069.68	13.1085	1092.06	12.6338	1136.97	26.6728	1136.97	26.6728
SR4.2-Spot 287	198.309	132835	0.22976	12.8692	1.11205	2.0995	1.63017	0.195959	1.19198	0.731198	1.00364	1153.58	12.5903	1148.64	11.2126	1139.34	22.0994	1139.34	22.0994
SR4.1-Spot 17	454.576	570831	0.563489	12.8684	0.884839	2.03569	1.53478	0.189992	1.25404	0.81708	0.941052	1121.33	12.9069	1127.52	10.4507	1139.46	17.5884	1139.46	17.5884
SR4.1-Spot 290	29.0193	110387	0.501444	12.833	1.52946	2.00281	2.02053	0.18641	1.32033	0.653459	0.934899	1101.9	13.3732	1116.46	13.6846	1144.91	30.4147	1144.91	30.4147
SR4.1-Spot 159	87.0869	115087	0.344118	12.8178	1.19315	2.06916	1.77246	0.192356	1.31073	0.739497	0.951577	1134.13	13.6312	1138.65	12.134	1147.31	23.7038	1147.31	23.7038
SR4.1-Spot 211	225.482	217246	0.0852172	12.8078	0.896803	1.98711	1.50851	0.184585	1.213	0.8041	1.00267	1091.97	12.1845	1111.14	10.1898	1148.87	17.793	1148.87	17.793
SR4.1-Spot 62	119.32	78271.5	0.241844	12.7952	1.31054	2.10589	1.84393	0.195426	1.29714	0.703465	0.974692	1150.7	13.6699	1150.73	12.6954	1150.82	26.023	1150.82	26.023
SR4.2-Spot 172	233.825	209507	0.420619	12.7951	0.9012	2.1381	1.34619	0.198413	1.00004	0.742863	1.03816	1166.79	10.6733	1161.21	9.31345	1150.83	17.891	1150.83	17.891
SR4.1-Spot 288	122.946	61981.9	0.311069	12.7922	1.06166	2.08836	1.75595	0.193753	1.39865	0.796522	1.02072	1141.67	14.634	1144.99	12.057	1151.27	21.0844	1151.27	21.0844
SR4.2-Spot 24	126.264	189339	0.353657	12.7773	1.08691	2.18408	1.79313	0.202398	1.42617	0.795351	1.00412	1188.19	15.4756	1175.98	12.4896	1153.56	21.5797	1153.56	21.5797
SR4.1-Spot 38	123.943	90168.2	0.31301	12.7689	1.26813	2.13963	1.84071	0.198148	1.33419	0.724825	1.007	1165.37	14.2239	1161.71	12.7379	1154.87	25.1689	1154.87	25.1689
SR4.1-Spot 197	83.2885	77881.4	0.252402	12.7673	1.28588	2.16549	1.74012	0.200518	1.1724	0.673747	1.0069	1178.1	12.6235	1170.03	12.0877	1155.11	25.5362	1155.11	25.5362
SR4.2-Spot 293	111.933	55231.8	0.651736	12.7587	1.11132	2.05664	1.65662	0.190311	1.22857	0.741608	1.01638	1123.06	12.6625	1134.5	11.3184	1156.45	22.0663	1156.45	22.0663
SR4.2-Spot 125	107.878	4.1343e+06	0.351902	12.7542	1.10073	2.12437	1.4411	0.196509	0.930144	0.645438	0.915158	1156.54	9.8477	1156.76	9.94963	1157.15	21.8542	1157.15	21.8542
SR4.1-Spot 86	251.515	69123.8	0.386917	12.7541	0.894724	2.15573	1.38848	0.199409	1.06177	0.764697	0.966911	1172.14	11.3796	1166.9	9.63115	1157.16	17.7618	1157.16	17.7618
SR4.1-Spot 209	94.817	89564.7	0.35014	12.7426	1.00147	2.03954	1.61549	0.18849	1.26762	0.784667	0.999468	1113.19	12.9599	1128.81	11.0071	1158.96	19.8801	1158.96	19.8801
SR4.1-Spot 186	358.965	97761	0.258426	12.7323	1.16305	1.71463	1.91219	0.158335	1.51782	0.793762	0.934417	947.518	13.3747	1014.02	12.2643	1160.56	23.0605	1160.56	23.0605
SR4.2-Spot 223	621.402	333976	0.391163	12.6886	0.704555	2.13692	1.50314	0.196652	1.32779	0.883346	1.00092	1157.31	14.0663	1160.83	10.3975	1167.38	13.9734	1167.38	13.9734
SR4.1-Spot 305	31.8951	164358	0.641205	12.6781	1.74838	2.07133	2.42437	0.190459	1.67952	0.692762	0.986387	1123.86	17.3217	1139.37	16.6032	1169.01	34.6256	1169.01	34.6256
SR4.1-Spot 298	189.815	207126	0.489004	12.6661	0.969286	2.14789	1.67834	0.197312	1.37015	0.816372	0.992221	1160.87	14.5557	1164.37	11.6284	1170.92	19.19	1170.92	19.19
SR4.1-Spot 87	57.8212	39063.9	0.635937	12.6565	1.229	2.15015	1.95527	0.197371	1.52074	0.777765	0.981535	1161.18	16.1595	1165.1	13.5519	1172.42	24.3078	1172.42	24.3078
SR4.2-Spot 244	167.285	119757	0.34949	12.6378	1.39779	2.15963	1.93845	0.197947	1.34304	0.692842	0.989755	1164.28	14.306	1168.15	13.454	1175.35	27.6505	1175.35	27.6505
SR4.1-Spot 188	66.8901	56316	1.0493	12.6338	1.46401	2.10944	1.99662	0.193285	1.35764	0.679967	1.00079	1139.15	14.1761	1151.89	13.7543	1175.98	28.9622	1175.98	28.9622
SR4.2-Spot 211	163.582	192275	0.306946	12.6274	1.21109	2.1652	1.89752	0.198294	1.46077	0.76983	0.981339	1166.15	15.5828	1169.94	13.1807	1176.98	23.9676	1176.98	23.9676
SR4.2-Spot 174	387.482	122453	0.376245	12.6273	0.869532	2.1695	1.74634	0.198687	1.51447	0.867225	0.995186	1168.26	16.1824	1171.32	12.138	1176.99	17.2052	1176.99	17.2052
SR4.1-Spot 200	231.027	124190	0.17609	12.6202	1.27418	2.16501	1.86301	0.198164	1.35914	0.729543	0.94324	1165.45	14.4908	1169.88	12.9405	1178.11	25.1995	1178.11	25.1995
SR4.1-Spot 157	87.6977	128894	0.274174	12.5908	1.24176	2.14519	1.94375	0.195892	1.4954	0.769334	0.87486	1153.21	15.7907	1163.5	13.4622	1182.72	24.5614	1182.72	24.5614
SR4.2-Spot 134	295.261	217996	0.417311	12.544	0.93564	2.09076	1.5761	0.190212	1.26834	0.80473	0.884549	1122.53	13.0667	1145.78	10.826	1190.07	18.4727	1190.07	18.4727
SR4.1-Spot 248	643.544	92640.6	0.154819	12.5385	0.900539	2.19447	1.83351	0.19956	1.59712	0.871072	0.991147	1172.96	17.128	1179.29	12.7899	1190.92	17.7767	1190.92	17.7767
SR4.1-Spot 95	40.2284	101472	0.610633	12.5382	1.64506	2.10463	2.16538	0.191386	1.40807	0.650264	0.999685	1128.88	14.5815	1150.32	14.906	1190.95	32.4743	1190.95	32.4743
SR4.2-Spot 302	350.675	132659	0.0369528	12.5224	0.847391	2.04275	1.58027	0.185525	1.33386	0.844071	0.950661	1097.09	13.4562	1129.88	10.7728	1193.44	16.7208	1193.44	16.7208
SR4.1-Spot 235	137.905	54042.6	0.437348	12.5186	1.07291	2.30162	1.77038	0.208973	1.40823	0.795439	1.00268	1223.34	15.6916	1212.79	12.5322	1194.05	21.1701	1194.05	21.1701
SR4.2-Spot 13	422.978	80254.5	0.339232	12.5179	0.977335	2.19639	1.72781	0.199406	1.42483	0.824646	1.01296	1172.13	15.2706	1179.9	12.0558	1194.18	19.2722	1194.18	19.2722
SR4.2-Spot 212	41.5785	39643.7	0.639262	12.5136	1.65426	2.2352	2.23317	0.202861	1.50015	0.67176	1.00327	1190.67	16.3093	1192.15	15.6675	1194.86	32.6382	1194.86	32.6382
SR4.1-Spot 59	403.738	136085	0.989268	12.4891	1.0181	2.267	1.61384	0.205344	1.25217	0.775897	1.01001	1203.97	13.7516	1202.08	11.3713	1198.72	20.0567	1198.72	20.0567
SR4.1-Spot 96	185.746	138818	0.257745	12.4645	1.49912	2.10368	2.51141	0.190174	2.01491	0.8023	0.993467	1122.32	20.7547	1150.01	17.2859	1202.58	29.544	1202.58	29.544
SR4.1-Spot 226	69.5084	48367.8	0.81019	12.4619	1.56002	2.26604	2.19092	0.20481	1.53834	0.702142	0.902624	1201.11	16.8579	1201.78	15.4361	1202.98	30.7421	1202.98	30.7421
SR4.1-Spot 78	298.045	139513	0.150129	12.4606	1.07499	2.26643	1.53922	0.204823	1.10163	0.715707	1.02086	1201.18	12.0728	1201.91	10.8446	1203.2	21.1644	1203.2	21.1644
SR4.2-Spot 190	65.2732	54909.3	0.361297	12.4471	1.26582	2.07841	1.64512	0.187629	1.05077	0.638722	0.986916	1108.52	10.7016	1141.71	11.2785	1205.33	24.9362	1205.33	24.9362
SR4.2-Spot 239	84.3492	42841.7	0.796363	12.442	1.10237	2.31276	1.89863	0.208698	1.54582	0.814179	1.0255	1221.88	17.206	1216.21	13.4597	1206.14	21.6951	1206.14	21.6951
SR4.1-Spot 172	149.847	60279.6	0.737916	12.3853	1.08629	2.03123	1.79763	0.182459	1.43228	0.796763	0.973829	1080.39	14.2471	1126.03	12.2318	1215.16	21.3748	1215.16	21.3748
SR4.1-Spot 123	112.1	241281	0.375961	12.3851	1.18767	2.29491	1.8279	0.206141	1.38949	0.760154	0.997939	1208.23	15.3088	1210.72	12.9279	1215.19	23.3796	1215.19	23.3796
SR4.2-Spot 237	390.672	178149	0.396439	12.3742	0.908401	2.315	1.54361	0.207762	1.24801	0.808503	0.999991	1216.88	13.8396	1216.89	10.9459	1216.93	17.8711	1216.93	17.8711
SR4.2-Spot 280	278.95	73384.5	0.405935	12.3711	0.992612	2.29443	1.52765	0.205865	1.16122	0.760135	0.986639	1206.75	12.7796	1210.57	10.8035	1217.37	19.5255	1217.37	19.5255
SR4.1-Spot 255	150.482	95157	0.518376	12.367	0.987585	2.32592	1.65716	0.20862	1.33074	0.803022	0.988423	1221.46	14.8073	1220.23	11.7678	1218.07	19.4234	1218.07	19.4234
SR4.1-Spot 33	72.2748	28820.3	0.53087	12.3615	3.67389	1.83907	3.89078	0.16488	1.2809	0.329214	0.962052	983.842	11.6875	1059.53	25.5965	1218.94	72.2398	1218.94	72.2398
SR4.2-Spot 76	204.052	95881.4	0.682591	12.3498	0.866569	2.35346	1.66377	0.210797	1.42028	0.853651	1.00639	1233.06	15.94	1228.61	11.8565	1220.77	17.0504	1220.77	17.0504
SR4.2-Spot 131	198.524	228447	0.481137	12.3417	1.06466	2.33396	1.72813	0.208914	1.36123	0.787687	0.922902	1223.03	15.1643	1222.69	12.2846	1222.07	20.9209	1222.07	20.9209
SR4.1-Spot 77	185.738	60405.9	0.53595	12.3402	1.09188	2.26626	1.75799	0.20283	1.3778	0.783733	0.967289	1190.5	14.9772	1201.85	12.3859	1222.29	21.4637	1222.29	21.4637
SR4.2-Spot 20	49.4659	58837.3	0.274704	12.3169	1.24119	2.37006	1.69414	0.211719	1.15306	0.680618	1.03113	1237.97	12.9876	1233.62	12.0982	1226.02	24.3812	1226.02	24.3812
SR4.1-Spot 164	518.134	104973	0.137272	12.307	0.997881	2.26642	2.11282	0.202297	1.86232	0.881439	0.957241	1187.65	20.2	1201.9	14.8865	1227.6	19.5827	1227.6	19.5827
SR4.2-Spot 206	153.874	90211.3	0.370031	12.2996	1.16402	2.34438	1.88285	0.209131	1.47993	0.786004	1.02822	1224.18	16.5008	1225.85	13.4025	1228.77	22.8602	1228.77	22.8602
SR4.1-Spot 232	34.5737	33203.1	0.583541	12.2995	1.96366	2.26782	2.68522	0.2023	1.83151	0.682073	0.987794	1187.66	19.8661	1202.34	18.9239	1228.79	38.5634	1228.79	38.5634
SR4.2-Spot 34	70.0152	83088.1	0.421422	12.2964	1.22578	2.22998	1.85431	0.198873	1.39138	0.750347	1.00696	1169.26	14.8787	1190.51	12.9998	1229.29	24.0641	1229.29	24.0641
SR4.2-Spot 175	135.409	145450	0.269295	12.2718	0.948006	2.34449	1.52023	0.208668	1.18844	0.781749	1.00425	1221.72	13.2265	1225.89	10.8212	1233.24	18.6069	1233.24	18.6069
SR4.2-Spot 189	158.595	72836.5	0.349086	12.2584	0.99319	2.41529	1.70616	0.214735	1.38728	0.813103	0.947858	1253.99	15.809	1247.16	12.2521	1235.39	19.4628	1235.39	19.4628
SR4.2-Spot 251	230.61	202086	0.601357	12.2524	0.942981	2.37913	1.52762	0.211415	1.20184	0.786738	0.895745	1236.35	13.521	1236.35	10.9213	1236.36	18.4803	1236.36	18.4803
SR4.2-Spot 261	326.402	201374	0.486103	12.2416	0.740661	2.34664	1.49122	0.208345	1.29428	0.867933	0.994665	1219.99	14.386	1226.54	10.6176	1238.08	14.521	1238.08	14.521
SR4.1-Spot 270	676.809	189318	0.291666	12.1017	1.01966	2.3669	1.56721	0.207742	1.19014	0.7594	1.00985	1216.78	13.1968	1232.67	11.1873	1260.54	19.9176	1260.54	19.9176
SR4.1-Spot 63	161.392	224790	0.70778	12.1013	0.881173	2.36588	1.60606	0.207647	1.34275	0.836049	1.01387	1216.27	14.8832	1232.36	11.4632	1260.6	17.2209	1260.6	17.2209
SR4.1-Spot 240	90.8041	50751.4	0.191831	12.0868	1.14843	2.37834	1.58049	0.20849	1.08584	0.687029	1.00802	1220.77	12.0761	1236.11	11.2982	1262.95	22.4338	1262.95	22.4338
SR4.1-Spot 238	102.261	93223.8	0.140972	12.0755	1.19085	2.49066	2.12662	0.218131	1.76193	0.828512	0.992587	1271.99	20.3391	1269.32	15.4085	1264.78	23.2589	1264.78	23.2589
SR4.1-Spot 247	92.4079	137375	0.404337	12.0737	1.2832	2.42425	1.85505	0.212284	1.33964	0.722156	0.990657	1240.98	15.1223	1249.82	13.3359	1265.08	25.0448	1265.08	25.0448
SR4.1-Spot 287	141.281	237251	0.246667	12.0227	1.08728	2.47335	2.11506	0.215668	1.81419	0.85775	0.953181	1258.95	20.7479	1264.27	15.2941	1273.37	21.2102	1273.37	21.2102
SR4.1-Spot 127	190.769	249246	0.311557	12.0143	0.810563	2.3942	1.51597	0.208621	1.28108	0.845053	0.941931	1221.47	14.2548	1240.87	10.8583	1274.69	15.7905	1274.69	15.7905
SR4.2-Spot 184	186.553	227704	0.2093	11.9849	1.04147	2.5383	1.44928	0.220636	1.00784	0.695409	0.973103	1285.23	11.7435	1283.09	10.5571	1279.48	20.2814	1279.48	20.2814
SR4.2-Spot 5	103.735	87493.7	0.509331	11.9644	0.971146	2.47783	1.7923	0.215011	1.50639	0.84048	1.00036	1255.46	17.1845	1265.58	12.9666	1282.81	18.9019	1282.81	18.9019
SR4.2-Spot 252	174.108	83334.1	0.465408	11.9542	1.00863	2.42593	1.60166	0.210328	1.24419	0.776809	0.984202	1230.56	13.9379	1250.32	11.5165	1284.47	19.634	1284.47	19.634
SR4.2-Spot 264	278.026	2.00167e+07	1.86577	11.8556	0.954407	2.45204	1.69136	0.210839	1.39636	0.825582	0.980336	1233.29	15.674	1258.02	12.1994	1300.58	18.5473	1300.58	18.5473
SR4.1-Spot 266	999.76	6.13161e+06	0.258198	11.8286	0.724545	2.15657	1.50914	0.185011	1.32384	0.877212	0.955262	1094.29	13.3238	1167.17	10.4695	1305.01	14.0714	1305.01	14.0714
SR4.2-Spot 124	262.973	178959	0.170974	11.8275	0.967025	2.52088	1.614	0.216244	1.29223	0.800639	1.02187	1262	14.811	1278.07	11.7342	1305.19	18.7795	1305.19	18.7795
SR4.2-Spot 231	233.754	151981	0.41698	11.8029	1.21156	2.24715	2.09162	0.192362	1.705	0.815156	1.0045	1134.16	17.7319	1195.9	14.6985	1309.24	23.515	1309.24	23.515
SR4.1-Spot 88	319.48	123159	0.527557	11.7735	1.02931	2.68356	1.74631	0.229148	1.41072	0.807829	1.00739	1330.03	16.954	1323.94	12.9187	1314.07	19.9644	1314.07	19.9644
SR4.1-Spot 203	95.238	158477	0.520353	11.7642	1.6386	2.4621	2.29406	0.210071	1.60552	0.69986	0.96787	1229.19	17.9676	1260.98	16.5668	1315.61	31.7761	1315.61	31.7761
SR4.2-Spot 267	226.946	163618	0.354491	11.7433	1.11529	2.55289	1.70855	0.217431	1.29433	0.757559	1.00128	1268.29	14.9019	1287.26	12.4661	1319.05	21.6163	1319.05	21.6163
SR4.2-Spot 103	52.2183	140740	0.476009	11.6945	1.52193	2.57116	2.23972	0.218077	1.64319	0.733658	1.01506	1271.7	18.9645	1292.47	16.375	1327.12	29.4657	1327.12	29.4657
SR4.1-Spot 227	153.552	237186	0.457286	11.6912	1.10173	2.70704	1.62344	0.229538	1.19236	0.73447	0.919683	1332.08	14.3496	1330.39	12.038	1327.66	21.3283	1327.66	21.3283
SR4.1-Spot 35	442.584	75635.6	0.0732677	11.6748	1.22641	2.42223	1.68869	0.205098	1.16086	0.687432	0.972906	1202.65	12.7362	1249.22	12.1369	1330.39	23.7328	1330.39	23.7328
SR4.1-Spot 112	108.786	60011	0.315645	11.6542	1.53327	2.55968	2.15995	0.216355	1.52134	0.70434	1.01205	1262.59	17.4442	1289.2	15.7718	1333.8	29.6577	1333.8	29.6577
SR4.2-Spot 204	477.599	112269	0.435409	11.6022	0.873522	2.69285	1.47781	0.226596	1.19201	0.806604	0.945824	1316.63	14.1954	1326.5	10.9425	1342.44	16.8753	1342.44	16.8753
SR4.2-Spot 221	70.725	175625	0.453266	11.5928	1.23817	2.64299	1.80036	0.22222	1.307	0.725966	0.941091	1293.6	15.319	1312.69	13.2633	1344	23.9152	1344	23.9152
SR4.2-Spot 308	132.73	132250	0.458328	11.584	1.19949	2.63581	1.74689	0.221449	1.26997	0.726992	1.02424	1289.52	14.8426	1310.69	12.8597	1345.47	23.1638	1345.47	23.1638
SR4.1-Spot 11	68.1863	247824	0.49706	11.5728	1.10021	2.70353	1.44893	0.226918	0.942826	0.650707	0.952044	1318.33	11.241	1329.43	10.7401	1347.34	21.2414	1347.34	21.2414
SR4.1-Spot 177	55.5233	65387.1	0.436235	11.5678	1.29412	2.68258	1.81561	0.225061	1.27345	0.701391	0.978255	1308.56	15.0815	1323.67	13.43	1348.18	24.9818	1348.18	24.9818
SR4.2-Spot 246	93.9981	159056	0.733195	11.5587	0.985651	2.61368	1.46296	0.219109	1.08108	0.73897	1.00975	1277.17	12.5255	1304.49	10.7444	1349.69	19.0225	1349.69	19.0225
SR4.2-Spot 102	371.351	66688.5	0.704834	11.543	1.012	2.74644	1.70542	0.229925	1.3727	0.804904	1.00555	1334.1	16.5425	1341.12	12.6951	1352.32	19.5241	1352.32	19.5241
SR4.1-Spot 49	110.289	143219	0.256358	11.5016	1.16811	2.82195	1.69832	0.2354	1.23281	0.725896	0.994212	1362.74	15.143	1361.39	12.7332	1359.24	22.5144	1359.24	22.5144
SR4.2-Spot 93	45.9182	174084	1.06819	11.4695	1.59348	2.92384	2.26341	0.243218	1.60743	0.710182	1.01102	1403.4	20.2722	1388.1	17.1268	1364.64	30.6901	1364.64	30.6901
SR4.1-Spot 21	68.4672	202728	0.272952	11.4315	1.14172	2.84943	1.78446	0.236243	1.37141	0.768532	0.962748	1367.14	16.8944	1368.66	13.4129	1371.02	21.969	1371.02	21.969
SR4.1-Spot 192	255.468	78889.7	0.477444	11.405	0.857599	2.83383	1.36239	0.234406	1.0586	0.777017	0.980774	1357.55	12.9587	1364.54	10.2256	1375.48	16.4921	1375.48	16.4921
SR4.2-Spot 145	42.1572	39637.1	0.404006	11.3764	1.40901	2.87286	1.90545	0.237039	1.28274	0.673198	0.887328	1371.28	15.8451	1374.82	14.3529	1380.3	27.078	1380.3	27.078
SR4.1-Spot 251	315.406	7.07566e+06	0.286874	11.3601	0.959486	2.77813	1.63804	0.228892	1.32762	0.810491	0.996266	1328.69	15.9408	1349.68	12.2307	1383.07	18.4323	1383.07	18.4323
SR4.2-Spot 298	84.7276	105371	0.159682	11.3517	3.35534	2.3092	3.63985	0.190116	1.41074	0.387583	0.986885	1122.01	14.5277	1215.11	25.7955	1384.49	64.4597	1384.49	64.4597
SR4.2-Spot 70	101.876	104559	0.982835	11.3514	1.05454	2.89588	1.83157	0.238412	1.49753	0.817622	0.947644	1378.43	18.5848	1380.84	13.8247	1384.54	20.2542	1384.54	20.2542
SR4.2-Spot 138	183.267	80542	0.422556	11.3164	1.00383	2.932	1.73689	0.240641	1.41743	0.816074	1.01174	1390.03	17.7233	1390.21	13.1515	1390.47	19.2632	1390.47	19.2632
SR4.2-Spot 225	492.887	475302	0.361833	11.3121	1.18184	2.74055	1.64786	0.224843	1.14834	0.696871	0.990797	1307.41	13.589	1339.53	12.2595	1391.19	22.6771	1391.19	22.6771
SR4.2-Spot 47	186.675	462669	0.397108	11.3032	0.918171	3.00457	1.60504	0.24631	1.31648	0.820216	0.996495	1419.42	16.7722	1408.78	12.2283	1392.7	17.614	1392.7	17.614
SR4.1-Spot 9	193.213	109999	0.275261	11.2999	1.08993	3.04613	1.73367	0.249644	1.3482	0.77766	0.968698	1436.64	17.3624	1419.26	13.2534	1393.27	20.9076	1393.27	20.9076
SR4.1-Spot 301	188.292	185333	0.340287	11.2657	0.969848	2.94761	1.60331	0.24084	1.27671	0.796298	0.995657	1391.06	15.9744	1394.23	12.1564	1399.07	18.5893	1399.07	18.5893
SR4.1-Spot 264	69.7956	61140	0.573505	11.2647	1.44675	2.97887	1.84314	0.243372	1.14195	0.619571	0.986492	1404.2	14.4091	1402.24	14.0122	1399.25	27.7304	1399.25	27.7304
SR4.1-Spot 15	92.2276	45895.1	0.845769	11.249	1.06603	2.78758	1.4268	0.227425	0.948336	0.664659	0.953184	1320.99	11.3272	1352.21	10.6629	1401.92	20.425	1401.92	20.425
SR4.2-Spot 165	216.16	50362.1	0.557619	11.2418	0.828827	2.99654	1.50173	0.244318	1.2523	0.833901	0.969346	1409.1	15.8508	1406.74	11.4334	1403.15	15.8774	1403.15	15.8774
SR4.2-Spot 64	77.019	56532.7	0.550718	11.236	1.21989	2.66983	2.64977	0.217567	2.35226	0.887723	0.971223	1269	27.096	1320.15	19.5762	1404.14	23.3662	1404.14	23.3662
SR4.1-Spot 274	94.1161	217336	0.742951	11.2263	1.21089	3.0171	1.95958	0.245654	1.54069	0.786233	0.985862	1416.02	19.5867	1411.95	14.9452	1405.79	23.1884	1405.79	23.1884
SR4.1-Spot 116	316.386	53901.3	0.405371	11.2143	1.09197	2.90085	1.63544	0.235937	1.21749	0.744439	0.979929	1365.54	14.9825	1382.13	12.3496	1407.84	20.9052	1407.84	20.9052
SR4.2-Spot 243	392.969	77169.3	0.373153	11.2127	1.05357	2.85771	1.43815	0.232395	0.978917	0.680676	0.959454	1347.04	11.8999	1370.84	10.8178	1408.11	20.1693	1408.11	20.1693
SR4.2-Spot 178	133.83	296611	0.604417	11.1841	1.1854	2.93102	1.87818	0.23775	1.45685	0.77567	0.962494	1374.99	18.0394	1389.96	14.2203	1412.99	22.678	1412.99	22.678
SR4.1-Spot 228	517.561	364370	0.312796	11.1719	0.764524	2.53314	1.36886	0.205252	1.13546	0.829496	1.04187	1203.47	12.4652	1281.6	9.96554	1415.08	14.6218	1415.08	14.6218
SR4.1-Spot 41	77.2108	92420.6	0.404428	11.1672	1.0718	3.16487	1.79195	0.256331	1.43609	0.801408	0.99138	1471.04	18.8885	1448.63	13.8273	1415.88	20.4967	1415.88	20.4967
SR4.1-Spot 258	271.332	170014	0.261262	11.1562	1.09258	3.07085	1.83908	0.248471	1.47935	0.804397	0.9446	1430.58	18.9796	1425.45	14.0874	1417.77	20.8888	1417.77	20.8888
SR4.1-Spot 29	212.72	451874	0.411161	11.1386	1.34313	2.98614	1.96044	0.241234	1.42805	0.728436	0.939778	1393.11	17.8916	1404.1	14.9133	1420.8	25.6686	1420.8	25.6686
SR4.2-Spot 54	165.239	1.25729e+06	0.46044	11.1268	0.841754	3.06672	1.84035	0.247482	1.63656	0.889267	0.997069	1425.48	20.9296	1424.42	14.0925	1422.82	16.082	1422.82	16.082
SR4.1-Spot 303	511.939	317246	0.0151676	11.1184	0.949321	2.98343	1.73786	0.240578	1.45566	0.837617	0.884338	1389.7	18.1975	1403.41	13.2169	1424.26	18.1337	1424.26	18.1337
SR4.2-Spot 290	164.008	68334.3	0.394114	11.1074	0.997591	2.99059	1.58371	0.240919	1.23002	0.77667	0.990209	1391.47	15.3942	1405.23	12.0516	1426.14	19.0509	1426.14	19.0509
SR4.2-Spot 289	101.058	119190	0.42734	11.1069	1.06361	3.06053	1.54309	0.24654	1.11797	0.724503	0.965097	1420.61	14.2538	1422.87	11.8101	1426.24	20.3115	1426.24	20.3115
SR4.2-Spot 278	439.816	58179.6	0.461525	11.0656	0.868323	2.72297	2.11558	0.218533	1.92917	0.911887	0.981838	1274.12	22.3034	1334.74	15.7126	1433.34	16.566	1433.34	16.566
SR4.1-Spot 103	141.122	356520	0.298752	11.022	1.06289	3.23312	1.55738	0.258452	1.13828	0.730896	0.977041	1481.92	15.07	1465.14	12.0783	1440.87	20.2576	1440.87	20.2576
SR4.1-Spot 113	205.703	187225	0.422971	11.0154	0.978012	3.10814	1.45587	0.248313	1.07845	0.740759	0.866274	1429.77	13.8291	1434.71	11.1847	1442.02	18.6369	1442.02	18.6369
SR4.2-Spot 157	107.685	77063.3	0.536039	11.0086	1.35807	3.16504	1.89695	0.252703	1.32441	0.698178	0.987159	1452.4	17.2228	1448.67	14.6378	1443.18	25.8757	1443.18	25.8757
SR4.1-Spot 25	82.9067	115321	0.544432	11.0016	1.15243	3.08373	1.57069	0.246055	1.06723	0.679465	0.985725	1418.1	13.5854	1428.65	12.0437	1444.4	21.9538	1444.4	21.9538
SR4.2-Spot 291	118.914	179687	0.230848	10.9647	1.22002	3.14703	1.78426	0.250263	1.30197	0.729699	1.02313	1439.83	16.8003	1444.27	13.7492	1450.8	23.2214	1450.8	23.2214
SR4.1-Spot 207	22.8569	167713	0.525698	10.955	1.65916	2.99259	2.20293	0.237771	1.44918	0.65784	0.961513	1375.1	17.9457	1405.74	16.7673	1452.48	31.5735	1452.48	31.5735
SR4.2-Spot 307	129.683	66574	0.648335	10.9235	1.08402	3.27597	1.85896	0.259537	1.51018	0.812379	0.999965	1487.47	20.0602	1475.36	14.4622	1457.97	20.6126	1457.97	20.6126
SR4.1-Spot 129	150.81	173043	0.57282	10.9191	1.18345	3.1855	1.9008	0.252269	1.48744	0.782534	0.85589	1450.17	19.3163	1453.65	14.6902	1458.73	22.5012	1458.73	22.5012
SR4.1-Spot 246	98.2238	67179.8	0.488291	10.9052	0.957096	3.22906	1.60875	0.255393	1.29308	0.803777	1.01305	1466.23	16.958	1464.16	12.4731	1461.15	18.1914	1461.15	18.1914
SR4.2-Spot 219	91.0433	204991	0.59892	10.8995	1.12227	3.16986	1.52493	0.25058	1.03243	0.677034	1.03002	1441.47	13.3356	1449.85	11.7711	1462.14	21.3282	1462.14	21.3282
SR4.1-Spot 173	67.432	43753.8	0.682538	10.8955	1.03347	3.08271	1.76325	0.2436	1.42863	0.810225	0.886035	1405.39	18.0399	1428.4	13.5193	1462.84	19.6386	1462.84	19.6386
SR4.2-Spot 210	220.021	66281.7	0.407734	10.8909	0.95572	3.26934	1.58594	0.258239	1.26563	0.798029	0.962429	1480.83	16.745	1473.79	12.3321	1463.64	18.1591	1463.64	18.1591
SR4.1-Spot 141	238.512	56426.9	0.154715	10.886	1.40646	3.15376	2.37581	0.248997	1.91477	0.805944	0.911029	1433.3	24.6076	1445.92	18.3179	1464.51	26.721	1464.51	26.721
SR4.1-Spot 183	266.594	104846	0.533029	10.879	0.873369	3.18555	1.5971	0.251345	1.33715	0.837234	0.956631	1445.41	17.3138	1453.66	12.3429	1465.72	16.5897	1465.72	16.5897
SR4.1-Spot 193	127.559	95178.2	0.365549	10.8726	1.17369	3.24129	2.28567	0.255593	1.96131	0.858089	0.990586	1467.26	25.7375	1467.09	17.7381	1466.84	22.2914	1466.84	22.2914
SR4.1-Spot 148	447.391	78001.8	0.0748426	10.8668	0.844918	3.07454	1.37717	0.242316	1.08753	0.789683	1.01457	1398.73	13.6745	1426.37	10.552	1467.85	16.0447	1467.85	16.0447
SR4.2-Spot 137	87.9738	96311.4	0.652452	10.8512	1.15373	3.22367	1.44442	0.253705	0.869049	0.60166	0.946266	1457.55	11.3369	1462.87	11.1944	1470.57	21.9013	1470.57	21.9013
SR4.1-Spot 171	59.5939	111344	0.656944	10.846	1.24847	3.18933	1.93295	0.250881	1.47568	0.763434	0.905022	1443.02	19.0793	1454.58	14.943	1471.49	23.6968	1471.49	23.6968
SR4.1-Spot 136	123.246	167270	0.444103	10.831	1.17253	3.26467	1.76862	0.256452	1.32408	0.74865	0.97582	1471.67	17.4218	1472.68	13.7481	1474.11	22.2476	1474.11	22.2476
SR4.2-Spot 132	51.0989	29668	0.506038	10.8093	1.49397	3.2183	1.96781	0.252303	1.28076	0.650855	0.934245	1450.34	16.6341	1461.58	15.2453	1477.92	28.3326	1477.92	28.3326
SR4.2-Spot 294	125.995	139182	0.393755	10.8086	0.877455	3.24365	1.2727	0.254275	0.921867	0.72434	0.974221	1460.48	12.0475	1467.66	9.87789	1478.04	16.6398	1478.04	16.6398
SR4.2-Spot 248	86.8307	215203	0.735745	10.7847	1.1889	3.21586	1.93773	0.251538	1.53014	0.789655	0.985501	1446.4	19.8249	1460.99	15.0095	1482.24	22.5336	1482.24	22.5336
SR4.2-Spot 171	294.917	199471	0.37462	10.7661	0.949652	3.35557	1.64077	0.262014	1.33802	0.815482	0.999997	1500.14	17.9078	1494.09	12.8358	1485.5	17.991	1485.5	17.991
SR4.1-Spot 79	38.6567	127974	0.776513	10.7355	1.57214	3.24692	2.0083	0.252808	1.24966	0.622248	0.958029	1452.94	16.2562	1468.44	15.5916	1490.91	29.7619	1490.91	29.7619
SR4.1-Spot 27	62.2808	98996.4	0.612304	10.7352	1.26351	3.17673	1.87657	0.247337	1.38747	0.739363	1.01926	1424.73	17.7357	1451.52	14.4933	1490.95	23.9199	1490.95	23.9199
SR4.1-Spot 294	147.312	92074.7	0.216619	10.7315	0.897238	3.35942	1.62502	0.261471	1.35486	0.833751	1.01195	1497.36	18.1034	1494.99	12.7159	1491.6	16.9841	1491.6	16.9841
SR4.1-Spot 120	613.372	411982	0.237773	10.6672	0.892503	3.14585	1.50508	0.243382	1.2119	0.805206	0.997699	1404.25	15.2921	1443.98	11.5966	1502.97	16.8673	1502.97	16.8673
SR4.2-Spot 148	566.532	99599.6	0.298213	10.6617	0.936856	3.34828	1.5953	0.25891	1.29124	0.809399	0.929301	1484.26	17.1191	1492.39	12.4738	1503.94	17.7034	1503.94	17.7034
SR4.2-Spot 158	1026.33	460926	0.13948	10.6477	0.959446	3.11676	1.65976	0.24069	1.35436	0.815993	1.00296	1390.28	16.9374	1436.83	12.7599	1506.43	18.1243	1506.43	18.1243
SR4.1-Spot 187	228.358	58514.1	0.39724	10.6429	1.00173	3.12308	1.46087	0.24107	1.06333	0.727874	0.993069	1392.26	13.3148	1438.39	11.2362	1507.28	18.9211	1507.28	18.9211
SR4.1-Spot 261	231.584	120219	0.420897	10.6293	1.007	3.32436	1.7429	0.256277	1.42255	0.816198	0.999994	1470.77	18.7073	1486.79	13.6055	1509.7	19.0144	1509.7	19.0144
SR4.1-Spot 138	338.357	91163.8	0.470325	10.6219	1.14659	3.04268	1.87063	0.2344	1.47803	0.790126	0.961907	1357.52	18.0928	1418.4	14.2966	1511.01	21.6469	1511.01	21.6469
SR4.2-Spot 96	85.5931	58928.2	0.364244	10.6141	1.054	3.35975	1.60033	0.258636	1.20422	0.752483	0.985394	1482.86	15.952	1495.06	12.523	1512.39	19.8949	1512.39	19.8949
SR4.1-Spot 306	113.235	174322	0.349548	10.6024	0.85173	3.3161	1.666	0.254994	1.43182	0.859436	0.961686	1464.18	18.754	1484.85	12.9976	1514.49	16.072	1514.49	16.072
SR4.2-Spot 208	565.148	216084	0.209635	10.5944	0.709779	3.39951	1.21329	0.26121	0.984021	0.811032	1.01577	1496.03	13.1379	1504.28	9.51965	1515.91	13.3906	1515.91	13.3906
SR4.2-Spot 301	99.0344	105308	0.846834	10.5492	1.1545	3.17862	1.64084	0.243195	1.16597	0.710592	0.948261	1403.29	14.7035	1451.98	12.6743	1523.97	21.7588	1523.97	21.7588
SR4.1-Spot 72	161.252	203154	0.32632	10.4989	0.813954	3.48818	1.30405	0.26561	1.01884	0.781287	0.861097	1518.48	13.7838	1524.55	10.2913	1532.96	15.3216	1532.96	15.3216
SR4.2-Spot 66	293.752	60042	0.270818	10.4642	0.855854	3.41238	1.85162	0.258978	1.64196	0.886766	0.965362	1484.61	21.7734	1507.25	14.5411	1539.19	16.0987	1539.19	16.0987
SR4.2-Spot 51	155.008	66895.6	0.881596	10.4365	0.947612	3.56264	1.60697	0.269666	1.29784	0.807631	0.961517	1539.11	17.7696	1541.25	12.7414	1544.17	17.813	1544.17	17.813
SR4.1-Spot 194	125.78	154083	0.307931	10.4127	1.04965	3.48405	1.8277	0.263116	1.49623	0.818642	0.958901	1505.77	20.092	1523.61	14.4204	1548.47	19.7201	1548.47	19.7201
SR4.1-Spot 282	68.2225	65152.6	0.533913	10.3996	1.09842	3.56957	1.55648	0.269235	1.10278	0.708505	0.993966	1536.92	15.0798	1542.79	12.3463	1550.83	20.6299	1550.83	20.6299
SR4.2-Spot 250	71.9735	112948	0.514615	10.3478	1.2132	3.5892	1.68237	0.269367	1.16555	0.692803	0.982621	1537.59	15.9444	1547.15	13.361	1560.21	22.7562	1560.21	22.7562
SR4.1-Spot 128	529.848	106904	0.16507	10.3357	0.774447	3.55093	1.45709	0.266184	1.23424	0.847057	1.01616	1521.41	16.7265	1538.64	11.5446	1562.39	14.5213	1562.39	14.5213
SR4.2-Spot 79	167.576	205974	0.513307	10.2719	1.2175	3.76862	1.8832	0.280759	1.43671	0.762908	1.03714	1595.18	20.3027	1586.09	15.1129	1574	22.7957	1574	22.7957
SR4.1-Spot 99	140.5	111019	0.636727	10.2056	1.15608	3.62135	1.764	0.268044	1.33236	0.755303	0.984966	1530.87	18.1557	1554.23	14.0365	1586.12	21.6113	1586.12	21.6113
SR4.2-Spot 40	280.911	196752	0.380473	10.0989	0.846378	3.76243	1.62956	0.275576	1.39251	0.854536	1.00674	1569.04	19.3934	1584.77	13.0726	1605.74	15.7808	1605.74	15.7808
SR4.2-Spot 15	173.642	52123.5	0.800477	10.0612	1.03498	3.78049	1.60237	0.275865	1.22328	0.763419	0.950502	1570.5	17.0505	1588.61	12.8674	1612.71	19.2804	1612.71	19.2804
SR4.1-Spot 91	112.772	60362.4	0.553987	10.0573	1.06159	3.81149	1.69194	0.278019	1.31746	0.778668	0.935929	1581.38	18.4754	1595.17	13.6099	1613.43	19.7743	1613.43	19.7743
SR4.1-Spot 242	112.418	53917.9	0.327198	10.0373	1.03455	3.87901	1.59163	0.282383	1.20955	0.759941	0.888916	1603.35	17.1697	1609.32	12.8495	1617.13	19.2613	1617.13	19.2613
SR4.1-Spot 265	92.9791	1.83531e+06	0.907298	10.0205	1.0841	3.74936	1.85295	0.272488	1.50271	0.810984	0.961449	1553.42	20.7439	1581.98	14.8541	1620.25	20.1759	1620.25	20.1759
SR4.1-Spot 23	386.456	9.21118e+06	0.560642	9.97565	0.810383	3.93652	1.59925	0.284808	1.37872	0.862106	0.89208	1615.53	19.702	1621.22	12.9497	1628.6	15.065	1628.6	15.065
SR4.2-Spot 11	217.677	151275	0.403553	9.97305	1.0201	3.99132	1.73477	0.288698	1.40314	0.808837	0.991275	1635.02	20.2635	1632.43	14.0864	1629.08	18.9631	1629.08	18.9631
SR4.1-Spot 145	157.623	124642	0.432848	9.95045	0.832135	3.94303	1.58058	0.284559	1.34379	0.850191	1.00617	1614.28	19.1897	1622.56	12.8028	1633.3	15.4601	1633.3	15.4601
SR4.1-Spot 70	185.517	153759	0.073809	9.94801	0.624782	4.16429	1.30186	0.300452	1.14214	0.877315	0.974605	1693.55	17.0106	1667.02	10.6596	1633.76	11.6082	1633.76	11.6082
SR4.2-Spot 27	214.061	180164	0.299711	9.94718	0.973863	3.97134	1.65958	0.286507	1.3438	0.809723	0.915827	1624.05	19.2921	1628.36	13.4623	1633.91	18.0922	1633.91	18.0922
SR4.2-Spot 28	562.214	53155	0.302914	9.92691	0.924	3.53304	1.723	0.254367	1.45429	0.844044	0.888879	1460.96	19.0111	1534.64	13.6364	1637.7	17.159	1637.7	17.159
SR4.1-Spot 308	46.7097	85578	0.961281	9.92622	1.24936	4.03811	1.72456	0.29071	1.18879	0.689327	0.906194	1645.08	17.2606	1641.91	14.0361	1637.83	23.1994	1637.83	23.1994
SR4.1-Spot 273	114.869	220408	0.553573	9.92442	0.948343	4.02134	1.77445	0.289451	1.49977	0.845204	1.0125	1638.78	21.7027	1638.52	14.4302	1638.17	17.61	1638.17	17.61
SR4.2-Spot 61	224.325	236966	0.651885	9.89015	0.89705	4.10438	1.3362	0.294408	0.990324	0.741148	0.982631	1663.52	14.5203	1655.17	10.91	1644.59	16.6438	1644.59	16.6438
SR4.1-Spot 19	67.6215	69748.5	0.944437	9.88463	0.978618	3.9506	1.39254	0.283219	0.990688	0.711427	0.996052	1607.55	14.0954	1624.11	11.2839	1645.62	18.1531	1645.62	18.1531
SR4.2-Spot 271	113.856	282053	0.802903	9.88132	1.16584	3.97995	2.05819	0.285227	1.69616	0.824103	0.869498	1617.63	24.266	1630.12	16.7035	1646.24	21.6249	1646.24	21.6249
SR4.1-Spot 74	153.857	245397	0.567411	9.87901	1.02926	4.06333	1.78245	0.291135	1.45526	0.816435	0.975689	1647.2	21.1535	1646.98	14.5253	1646.68	19.09	1646.68	19.09
SR4.2-Spot 42	41.6039	73554.3	0.485465	9.84626	1.19777	3.81978	1.91239	0.272778	1.49084	0.779566	0.992436	1554.88	20.5971	1596.92	15.3905	1652.83	22.1985	1652.83	22.1985
SR4.2-Spot 55	296.076	70956.9	0.383254	9.84295	0.973561	4.12174	1.97466	0.294242	1.71798	0.870014	0.987521	1662.69	25.1784	1658.62	16.137	1653.46	18.0412	1653.46	18.0412
SR4.1-Spot 57	44.4327	194930	0.392011	9.82765	1.07224	4.04107	1.50506	0.288035	1.05618	0.701751	0.971131	1631.7	15.2256	1642.5	12.2512	1656.34	19.8628	1656.34	19.8628
SR4.1-Spot 283	147.743	89535.7	0.343836	9.80963	0.938721	4.13756	1.57841	0.294372	1.26893	0.80393	0.988122	1663.34	18.6035	1661.75	12.9081	1659.74	17.3815	1659.74	17.3815
SR4.1-Spot 101	179.314	248456	0.420028	9.80668	0.892393	4.19188	1.8719	0.298147	1.6455	0.87905	0.8135	1682.11	24.3626	1672.43	15.3473	1660.3	16.5224	1660.3	16.5224
SR4.1-Spot 64	134.976	55491.2	0.328761	9.77073	0.837764	4.29426	1.6491	0.304308	1.42045	0.861349	0.877438	1712.64	21.3639	1692.26	13.5827	1667.09	15.4974	1667.09	15.4974
SR4.2-Spot 140	310.2	548205	1.04327	9.70972	0.730947	4.23674	1.51683	0.298358	1.32909	0.87623	0.81041	1683.16	19.6887	1681.17	12.4612	1678.67	13.503	1678.67	13.503
SR4.2-Spot 45	89.3553	80409	0.279209	9.69262	0.97444	4.2378	1.43247	0.297907	1.04997	0.732978	0.925443	1680.92	15.5357	1681.37	11.7686	1681.92	17.9938	1681.92	17.9938
SR4.1-Spot 152	510.266	610055	0.23367	9.65843	1.00105	3.79767	2.45181	0.266025	2.23814	0.912852	0.999329	1520.59	30.3172	1592.25	19.7087	1688.45	18.4682	1688.45	18.4682
SR4.1-Spot 293	175.814	75392.7	0.432166	9.56727	0.878644	4.42928	1.6041	0.30734	1.34206	0.836642	1.00569	1727.61	20.3386	1717.83	13.2885	1705.92	16.1738	1705.92	16.1738
SR4.2-Spot 311	348.378	184974	0.656604	9.56497	0.872204	4.2697	1.35482	0.296196	1.03673	0.765214	0.920811	1672.42	15.2719	1687.54	11.1466	1706.36	16.0544	1706.36	16.0544
SR4.1-Spot 104	146.341	192788	0.298765	9.54597	1.101	4.38178	1.53626	0.303368	1.07139	0.697403	0.919268	1707.99	16.0757	1708.91	12.7011	1710.02	20.2572	1710.02	20.2572
SR4.1-Spot 1	123.309	113888	0.367444	9.53766	0.843207	4.48251	1.40346	0.310071	1.12192	0.799395	0.999225	1741.06	17.1178	1727.74	11.6517	1711.63	15.5103	1711.63	15.5103
SR4.1-Spot 83	333.742	155950	0.230328	9.51519	0.963683	4.05579	1.64698	0.279893	1.33561	0.810945	0.930281	1590.82	18.8285	1645.46	13.4162	1715.96	17.717	1715.96	17.717
SR4.1-Spot 13	136.414	202782	0.402229	9.50386	1.00608	4.44669	1.84639	0.306504	1.54822	0.838508	0.961323	1723.48	23.4141	1721.08	15.307	1718.15	18.4915	1718.15	18.4915
SR4.2-Spot 198	224.952	225904	0.542084	9.48067	0.899877	4.57857	1.5599	0.314824	1.27416	0.816827	1.02024	1764.4	19.6673	1745.37	13.0004	1722.64	16.5317	1722.64	16.5317
SR4.2-Spot 234	207.935	217357	0.484327	9.45957	0.854973	4.59552	1.37094	0.315286	1.07169	0.781714	0.958419	1766.67	16.5604	1748.46	11.4331	1726.73	15.6968	1726.73	15.6968
SR4.2-Spot 232	98.9244	124252	0.8477	9.45903	0.759739	4.41227	1.4503	0.302696	1.23538	0.851811	0.99418	1704.66	18.5048	1714.65	12.0058	1726.84	13.9497	1726.84	13.9497
SR4.1-Spot 42	206.861	147275	0.283035	9.43493	0.766848	4.70368	1.29593	0.321866	1.04469	0.806132	0.950592	1798.83	16.3981	1767.89	10.852	1731.52	14.0702	1731.52	14.0702
SR4.1-Spot 156	210.455	154552	0.509437	9.42781	1.05624	4.35407	2.13121	0.297718	1.85105	0.868547	0.980107	1679.98	27.3757	1703.67	17.5999	1732.91	19.3776	1732.91	19.3776
SR4.1-Spot 153	190.348	193089	0.388192	9.42773	0.909149	4.54864	1.63853	0.311019	1.36317	0.831945	0.952031	1745.72	20.8471	1739.91	13.6397	1732.92	16.6787	1732.92	16.6787
SR4.1-Spot 259	871.706	391308	0.530086	9.4179	0.906085	4.26906	1.34823	0.291599	0.998361	0.740499	0.957444	1649.51	14.53	1687.42	11.092	1734.84	16.6185	1734.84	16.6185
SR4.2-Spot 112	300.367	124264	0.587125	9.37691	1.16266	4.22848	1.76465	0.287569	1.32749	0.752266	0.976927	1629.37	19.1127	1679.57	14.492	1742.83	21.3038	1742.83	21.3038
SR4.2-Spot 215	391.649	3.725e+07	0.686849	9.36335	0.981981	4.50872	1.56828	0.306184	1.22278	0.7797	0.821366	1721.9	18.4777	1732.58	13.034	1745.48	17.9868	1745.48	17.9868
SR4.1-Spot 165	174.447	146442	0.298915	9.34928	1.09017	4.61682	1.64956	0.313055	1.23798	0.750487	0.924578	1755.72	19.027	1752.31	13.7682	1748.23	19.962	1748.23	19.962
SR4.1-Spot 20	155.502	138158	0.556115	9.34524	0.851976	4.5439	1.43182	0.307977	1.15075	0.803702	0.950819	1730.74	17.467	1739.04	11.9165	1749.03	15.5983	1749.03	15.5983
SR4.2-Spot 179	92.6761	72323.6	0.400111	9.34169	1.12988	4.60444	1.81639	0.311962	1.4222	0.782982	0.95117	1750.35	21.8002	1750.07	15.1536	1749.72	20.6853	1749.72	20.6853
SR4.1-Spot 154	239.578	823579	0.233808	9.33334	0.773389	4.59289	1.51674	0.310901	1.30475	0.860232	0.971698	1745.14	19.9479	1747.98	12.6477	1751.36	14.1552	1751.36	14.1552
SR4.2-Spot 312	251.687	121742	0.988617	9.32873	0.726006	4.36532	1.23703	0.29535	1.00158	0.809664	1.00308	1668.21	14.7216	1705.8	10.2199	1752.26	13.2863	1752.26	13.2863
SR4.1-Spot 206	155.19	200350	0.652788	9.30571	1.16422	4.60988	1.80486	0.311127	1.37917	0.764142	1.00453	1746.25	21.0975	1751.06	15.0606	1756.78	21.2954	1756.78	21.2954
SR4.1-Spot 56	135.753	115505	0.173388	9.26186	1.10345	4.62803	1.76964	0.310881	1.38348	0.781786	0.994699	1745.04	21.1506	1754.34	14.777	1765.42	20.162	1765.42	20.162
SR4.1-Spot 168	187.539	55470	0.725188	9.23448	0.877518	4.58789	1.64272	0.307273	1.3887	0.845368	0.912294	1727.27	21.042	1747.07	13.6957	1770.83	16.0225	1770.83	16.0225
SR4.1-Spot 163	257.44	2.29472e+06	0.234178	9.16897	0.911772	4.48896	1.74401	0.298514	1.48668	0.852453	0.966535	1683.94	22.0321	1728.93	14.4831	1783.81	16.6214	1783.81	16.6214
SR4.2-Spot 149	246.015	315727	0.678669	9.15905	0.833076	4.94588	1.5187	0.328543	1.26982	0.836122	0.977149	1831.32	20.2432	1810.12	12.8278	1785.79	15.1828	1785.79	15.1828
SR4.2-Spot 129	108.968	285356	0.554944	9.13664	1.1006	4.78771	1.90899	0.317258	1.55979	0.817073	0.983922	1776.33	24.2174	1782.75	16.0358	1790.25	20.0483	1790.25	20.0483
SR4.2-Spot 68	251.683	164762	0.496252	9.1304	1.2393	4.1706	1.80365	0.276177	1.31045	0.726556	0.940739	1572.08	18.2817	1668.26	14.773	1791.49	22.5717	1791.49	22.5717
SR4.2-Spot 177	265.029	70141.7	0.680186	9.07527	1.23547	4.57793	2.76599	0.30132	2.47474	0.894701	0.920136	1697.85	36.9399	1745.26	23.0543	1802.52	22.4716	1802.52	22.4716
SR4.1-Spot 93	105.843	146546	0.455843	9.07302	1.1064	4.8015	1.76586	0.315957	1.37628	0.779382	0.999402	1769.95	21.3016	1785.16	14.8407	1802.97	20.1224	1802.97	20.1224
SR4.2-Spot 63	283.266	191713	0.824645	9.04162	0.707556	4.9352	1.32075	0.323631	1.11524	0.844395	1.00263	1807.44	17.578	1808.3	11.1516	1809.27	12.8577	1809.27	12.8577
SR4.2-Spot 255	172.75	236432	0.1367	9.00523	1.0856	5.05245	1.7284	0.329986	1.34493	0.778136	1.01918	1838.31	21.5113	1828.16	14.6512	1816.6	19.7111	1816.6	19.7111
SR4.2-Spot 36	117.776	125075	0.720275	9.00256	1.26087	5.00478	1.96718	0.326775	1.50997	0.767582	0.984997	1822.73	23.9741	1820.13	16.6495	1817.13	22.8925	1817.13	22.8925
SR4.2-Spot 214	84.7892	167496	0.247847	8.88837	1.14941	5.0996	1.67857	0.328743	1.22329	0.728771	0.978682	1832.29	19.5104	1836.04	14.2506	1840.28	20.8098	1840.28	20.8098
SR4.2-Spot 58	292.156	158510	0.215797	8.85538	0.994237	5.12045	1.60929	0.328862	1.26543	0.786326	0.997692	1832.86	20.1879	1839.5	13.6715	1847.01	17.9853	1847.01	17.9853
SR4.1-Spot 278	46.2465	237419	0.450497	8.84475	1.02405	5.09914	1.50914	0.327101	1.10852	0.734539	0.99672	1824.31	17.6133	1835.96	12.8118	1849.18	18.5198	1849.18	18.5198
SR4.1-Spot 170	280.618	177575	0.291364	8.75254	0.933896	4.64338	1.62677	0.294759	1.332	0.8188	0.981395	1665.27	19.548	1757.1	13.5918	1868.11	16.8506	1868.11	16.8506
SR4.2-Spot 282	183.022	143993	0.898713	8.62567	0.918507	5.30115	1.70641	0.331636	1.43812	0.842774	1.00187	1846.3	23.0883	1869.05	14.5779	1894.41	16.5206	1894.41	16.5206
SR4.1-Spot 176	64.8046	237467	0.286694	8.61038	1.00894	5.40566	1.48278	0.337574	1.08659	0.732806	1.00559	1874.99	17.6781	1885.75	12.7061	1897.6	18.1405	1897.6	18.1405
SR4.1-Spot 292	237.912	246159	1.02578	8.55612	0.991011	5.46797	1.8046	0.339314	1.50813	0.835718	0.987184	1883.37	24.6308	1895.58	15.4918	1908.96	17.7959	1908.96	17.7959
SR4.2-Spot 33	374.012	144408	0.361503	8.43893	0.985062	5.39242	1.6516	0.330042	1.32569	0.802667	1.02517	1838.59	21.2063	1883.65	14.1476	1933.69	17.6353	1933.69	17.6353
SR4.2-Spot 195	204.236	152872	0.578534	8.29223	0.953264	5.55647	1.41074	0.334171	1.03994	0.73716	0.992342	1858.57	16.7914	1909.38	12.1402	1965.02	17.0031	1965.02	17.0031
SR4.2-Spot 50	98.7393	110713	1.13421	8.2349	1.07478	5.99463	1.64568	0.35803	1.24624	0.757281	0.996697	1972.83	21.1803	1975.06	14.322	1977.39	19.1432	1977.39	19.1432
SR4.2-Spot 23	415.171	135162	0.349707	8.23297	0.808671	5.88713	1.62343	0.351527	1.40768	0.867105	0.981483	1941.89	23.6026	1959.34	14.0915	1977.81	14.4021	1977.81	14.4021
SR4.1-Spot 250	43.6261	63869.7	0.282754	8.22685	1.25629	5.89659	2.25883	0.35183	1.87725	0.831069	1.01151	1943.33	31.4959	1960.73	19.6126	1979.13	22.3702	1979.13	22.3702
SR4.2-Spot 303	71.5629	141022	0.812141	8.21553	1.0499	6.03431	1.66232	0.359552	1.28881	0.775304	0.998984	1980.05	21.9722	1980.81	14.4804	1981.59	18.6888	1981.59	18.6888
SR4.1-Spot 184	72.2123	844679	0.521816	8.19788	0.98835	6.0178	1.67373	0.357798	1.35076	0.807033	0.903759	1971.73	22.9456	1978.42	14.5741	1985.41	17.5871	1985.41	17.5871
SR4.1-Spot 139	178.498	77307.2	0.42457	8.19365	0.811278	5.95785	1.45258	0.354051	1.20491	0.829499	0.99198	1953.91	20.3098	1969.71	12.6301	1986.33	14.4341	1986.33	14.4341
SR4.1-Spot 241	97.2693	298290	0.66274	8.19091	1.10352	6.06737	1.53961	0.360438	1.07361	0.697324	0.96454	1984.25	18.3365	1985.57	13.4217	1986.93	19.6335	1986.93	19.6335
SR4.1-Spot 284	25.2284	58370.6	0.247639	7.99801	1.52008	6.29973	2.01528	0.365429	1.32315	0.656559	0.877523	2007.85	22.8278	2018.42	17.6614	2029.22	26.9142	2029.22	26.9142
SR4.2-Spot 46	115.532	176236	1.09325	7.99522	1.13536	6.40197	1.38201	0.37123	0.787982	0.570169	0.919648	2035.18	13.7521	2032.54	12.1375	2029.84	20.1	2029.84	20.1
SR4.1-Spot 61	242.07	175520	1.07934	7.98386	0.970455	6.25114	1.43775	0.361969	1.06082	0.737834	0.862104	1991.5	18.1746	2011.64	12.586	2032.36	17.1751	2032.36	17.1751
SR4.1-Spot 254	433.694	197006	0.303817	7.91869	0.62051	6.33311	1.65281	0.363722	1.53191	0.926852	0.99559	1999.79	26.3389	2023.05	14.4948	2046.85	10.9627	2046.85	10.9627
SR4.2-Spot 263	74.9231	169701	0.36569	7.89541	0.901306	6.66647	1.61063	0.381741	1.33483	0.828763	0.986846	2084.41	23.7732	2068.19	14.2218	2052.05	15.9152	2052.05	15.9152
SR4.1-Spot 147	226.558	90256.1	0.667454	7.86407	0.799762	6.29069	1.38524	0.358793	1.13105	0.816499	0.97982	1976.45	19.2527	2017.16	12.1368	2059.07	14.1126	2059.07	14.1126
SR4.1-Spot 231	149.871	1.4325e+06	0.176502	7.84081	1.02884	6.60165	1.66783	0.375415	1.31269	0.787063	0.884493	2054.83	23.0972	2059.57	14.7081	2064.3	18.1421	2064.3	18.1421
SR4.2-Spot 81	208.985	111426	0.152397	7.82708	0.872478	6.28354	1.80815	0.3567	1.58372	0.875882	0.975408	1966.51	26.8423	2016.16	15.8402	2067.39	15.3791	2067.39	15.3791
SR4.1-Spot 85	112.48	156683	0.327955	7.81709	0.80402	6.72457	1.51548	0.381248	1.28462	0.847662	1.01007	2082.11	22.8576	2075.86	13.3967	2069.64	14.1686	2069.64	14.1686
SR4.2-Spot 88	209.737	68293.5	0.705187	7.79498	1.10318	6.54945	1.60816	0.37027	1.17012	0.727613	0.979297	2030.67	20.3827	2052.57	14.167	2074.62	19.4305	2074.62	19.4305
SR4.2-Spot 49	66.466	72755.6	0.905487	7.79359	0.939527	6.60007	1.69772	0.373065	1.41406	0.832913	0.964782	2043.81	24.7674	2059.36	14.9713	2074.94	16.547	2074.94	16.547
SR4.2-Spot 288	104.13	165908	0.577225	7.75639	1.24665	6.64447	1.68933	0.373782	1.14004	0.67485	1.01346	2047.17	19.9959	2065.27	14.9103	2083.36	21.9361	2083.36	21.9361
SR4.1-Spot 275	52.5242	115637	1.41171	7.70068	1.12434	6.54886	1.72102	0.365757	1.30299	0.757103	0.894655	2009.41	22.4948	2052.49	15.1612	2096.04	19.7553	2096.04	19.7553
SR4.1-Spot 160	115.31	323369	0.390454	7.58459	1.12144	7.09412	1.68816	0.390238	1.26185	0.747471	1.00154	2123.93	22.8334	2123.31	15.0247	2122.68	19.6455	2122.68	19.6455
SR4.2-Spot 39	35.4333	30057.3	0.540935	7.48838	1.09202	6.5305	2.11961	0.354677	1.81666	0.85707	0.951208	1956.89	30.6614	2050.02	18.6663	2145.02	19.0826	2145.02	19.0826
SR4.1-Spot 30	35.8251	110596	0.38286	7.37192	1.18859	7.27701	1.77898	0.389074	1.32363	0.744041	0.985059	2118.53	23.8998	2145.99	15.8824	2172.37	20.7077	2172.37	20.7077
SR4.1-Spot 204	134.448	56710.9	0.773073	7.35821	0.951715	7.0656	1.70919	0.377068	1.41971	0.830631	0.992806	2062.57	25.0601	2119.72	15.2042	2175.61	16.5741	2175.61	16.5741
SR4.1-Spot 272	75.2476	152204	0.302952	7.34839	1.24393	7.39655	1.83527	0.394203	1.3494	0.735258	1.00402	2142.29	24.5955	2160.55	16.4171	2177.94	21.6586	2177.94	21.6586
SR4.1-Spot 289	95.0872	247500	0.449954	7.31755	1.29949	7.5098	1.98992	0.398559	1.50701	0.757325	0.85613	2162.4	27.6853	2174.16	17.8327	2185.26	22.608	2185.26	22.608
SR4.1-Spot 110	294.43	112732	0.943671	7.28901	0.744622	7.59148	1.80595	0.401322	1.6453	0.911041	0.924496	2175.13	30.3754	2183.86	16.2044	2192.05	12.9436	2192.05	12.9436
SR4.2-Spot 306	99.2295	96366.6	0.655513	6.8466	0.865878	8.24081	1.45804	0.409207	1.17308	0.804564	0.977155	2211.3	21.9592	2257.84	13.2033	2300.26	14.8772	2300.26	14.8772
SR4.1-Spot 142	45.3591	69598.9	0.35571	6.21435	1.12095	10.3235	1.69109	0.465287	1.2662	0.748745	0.978813	2462.86	25.9191	2464.21	15.6559	2465.32	18.935	2465.32	18.935
SR4.1-Spot 285	53.9741	200743	0.157017	6.00334	1.03721	10.8257	1.83959	0.471353	1.51931	0.825893	0.966639	2489.49	31.376	2508.27	17.101	2523.5	17.4187	2523.5	17.4187
SR4.1-Spot 10	530.539	173295	0.123211	5.53848	1.02805	11.7398	1.73909	0.471573	1.40269	0.806568	1.00267	2490.45	28.9768	2583.87	16.2737	2657.96	17.0412	2657.96	17.0412
SR4.1-Spot 98	68.5408	162409	0.930892	5.5383	1.09481	11.9125	1.78927	0.478497	1.41523	0.790955	0.827825	2520.72	29.5262	2597.55	16.7625	2658.01	18.148	2658.01	18.148
SR4.1-Spot 257	82.0912	414796	0.337571	5.45935	1.1178	12.8964	1.57122	0.510632	1.1042	0.702767	0.925241	2659.33	24.0612	2672.11	14.8069	2681.79	18.4874	2681.79	18.4874
SR4.2-Spot 99	17.1496	30436	0.47817	5.35027	1.22585	12.8049	2.00449	0.496878	1.58595	0.791202	0.975599	2600.36	33.9372	2665.4	18.881	2715.12	20.2117	2715.12	20.2117
SR4.1-Spot 216	49.6473	55032.7	0.75979	5.32853	1.10227	13.2394	1.71954	0.511651	1.31978	0.76752	1.02841	2663.67	28.7969	2696.87	16.2351	2721.83	18.1622	2721.83	18.1622
SR4.2-Spot 71	52.2911	91805.7	0.572464	5.30962	0.893125	13.4582	1.53525	0.518262	1.24873	0.813371	1.0285	2691.81	27.4784	2712.35	14.5115	2727.69	14.7073	2727.69	14.7073
SR4.1-Spot 295	148.976	107889	0.367456	5.28823	0.891189	13.6071	1.65116	0.521886	1.39	0.841835	0.981835	2707.17	30.7277	2722.76	15.619	2734.33	14.6665	2734.33	14.6665
SR4.1-Spot 26	31.1102	158016	0.489172	5.28453	1.04674	13.2717	1.77106	0.508667	1.42863	0.806654	0.980473	2650.93	31.0514	2699.17	16.7245	2735.48	17.2253	2735.48	17.2253
SR4.1-Spot 302	69.7285	51419.2	0.476963	5.22924	0.692831	13.8949	1.77012	0.526977	1.62889	0.920219	0.967963	2728.7	36.2389	2742.57	16.7683	2752.78	11.3853	2752.78	11.3853
SR4.1-Spot 196	19.1332	135173	0.0926648	4.50772	0.905802	17.8886	1.48109	0.584833	1.17182	0.791184	0.994865	2968.44	27.8759	2983.76	14.2435	2994.09	14.5666	2994.09	14.5666
SR4.1-Spot 80	249.436	1.56362e+06	0.00282118	4.4222	0.767616	17.5224	1.3815	0.561993	1.14861	0.831423	0.957735	2874.86	26.6407	2963.88	13.2709	3024.86	12.3152	3024.86	12.3152
SR6-Spot 170	979.412	35531.4	0.590723	20.1406	1.05136	0.185451	2.85433	0.0270896	2.65364	0.929691	0.99749	172.307	4.51184	172.741	4.53401	178.659	24.5284	172.307	2.70711
SR6-Spot 301	385.022	210544	0.494598	19.6314	1.23402	0.190672	4.67726	0.0271479	4.51154	0.964568	0.974442	172.673	7.68681	177.202	7.60543	238.046	28.4451	172.673	4.61209
SR6-Spot 236	486.389	66355	0.427448	19.3338	1.04484	0.195345	3.25261	0.0273917	3.08022	0.947	0.961494	174.203	5.294	181.18	5.39728	273.152	23.9499	174.203	3.1764
SR6-Spot 179	464.601	66611.2	0.626366	19.9964	1.17549	0.189205	2.40529	0.0274399	2.09848	0.872445	0.99179	174.506	3.61285	175.95	3.88575	195.429	27.322	174.506	2.16771
SR6-Spot 182	165.11	37685.8	0.456926	19.4317	1.46363	0.195299	2.95676	0.0275238	2.56909	0.868886	0.966277	175.032	4.43623	181.141	4.90538	261.573	33.6238	175.032	2.66174
SR6-Spot 313	758.276	66426.3	0.87883	20.0915	0.767123	0.189308	2.09399	0.0275854	1.94841	0.930479	0.996477	175.418	3.37178	176.038	3.38438	184.355	17.8662	175.418	2.02307
SR6-Spot 117	580.56	69126.8	0.58105	20.0189	1.09139	0.190098	2.8959	0.0276004	2.68238	0.926265	0.993209	175.513	4.6444	176.713	4.69691	192.821	25.379	175.513	2.78664
SR6-Spot 24	468.751	33322.5	0.527999	19.8432	1.0611	0.192032	2.70655	0.0276365	2.48987	0.919944	0.985296	175.739	4.31658	178.362	4.42726	213.241	24.5865	175.739	2.58995
SR6-Spot 6	319.261	14707.1	0.615092	20.1767	1.23661	0.188889	3.03613	0.0276411	2.77288	0.913295	1.00049	175.768	4.808	175.681	4.89801	174.49	28.8372	175.768	2.8848
SR6-Spot 249	1269.57	62011.4	0.829447	19.9775	0.968786	0.190887	2.53236	0.0276577	2.33972	0.92393	0.991467	175.872	4.05929	177.385	4.12157	197.603	22.5213	175.872	2.43557
SR6-Spot 67	368.706	37244.7	0.548037	19.9888	0.995533	0.190802	2.4209	0.027661	2.20673	0.911534	0.991988	175.893	3.829	177.313	3.93869	196.32	23.1376	175.893	2.2974
SR6-Spot 12	478.069	15341	0.70997	20.3263	1.05691	0.187718	3.30892	0.0276734	3.13558	0.947616	1.00738	175.971	5.44308	174.681	5.31023	157.257	24.7379	175.971	3.26585
SR6-Spot 133	309.135	29619.3	0.789326	19.7299	1.34234	0.193419	2.73662	0.0276772	2.38478	0.871436	0.980239	175.994	4.14031	179.542	4.50353	226.498	31.0125	175.994	2.48419
SR6-Spot 141	913.207	189019	0.838913	19.7283	0.83392	0.193456	2.21909	0.0276803	2.05643	0.926703	0.980175	176.013	3.57063	179.574	3.65242	226.707	19.2721	176.013	2.14238
SR6-Spot 8	523.169	52862.2	0.733371	20.3226	1.17913	0.189353	2.71286	0.0279094	2.4432	0.900601	1.0078	177.45	4.27635	176.077	4.38552	157.659	27.5819	177.45	2.56581
SR6-Spot 82	321.178	24873.4	0.801333	20.0212	1.51148	0.192415	3.24962	0.02794	2.87671	0.885246	0.994153	177.643	5.04051	178.687	5.32449	192.552	35.1575	177.643	3.0243
SR6-Spot 292	633.4	305646	0.852222	19.8014	0.873217	0.194689	1.97979	0.02796	1.77681	0.897475	0.984197	177.768	3.11545	180.623	3.27595	218.157	20.2182	177.768	1.86927
SR6-Spot 20	295.074	55934.9	0.511822	19.4759	1.42642	0.198052	2.51856	0.0279754	2.07569	0.824157	0.969413	177.865	3.64145	183.477	4.22755	256.388	32.7908	177.865	2.18487
SR6-Spot 269	841.894	73306.5	0.610316	20.099	0.884364	0.191937	2.65239	0.027979	2.50062	0.942778	0.99779	177.887	4.38746	178.281	4.33687	183.485	20.5991	177.887	2.63247
SR6-Spot 32	835.79	74691	0.637593	20.0892	0.867033	0.192149	2.32664	0.0279962	2.15905	0.92797	0.997386	177.995	3.79043	178.461	3.80775	184.622	20.2145	177.995	2.27426
SR6-Spot 222	644.561	222534	0.816029	19.8565	0.970204	0.194436	2.2997	0.0280012	2.08502	0.90665	0.986804	178.026	3.6611	180.407	3.80116	211.687	22.5058	178.026	2.19666
SR6-Spot 54	245.323	13651.6	0.967573	20.2426	1.27066	0.190734	2.9982	0.0280023	2.71562	0.905751	1.00439	178.033	4.76856	177.255	4.87649	166.869	29.6882	178.033	2.86114
SR6-Spot 290	540.771	29054.9	0.43299	20.0489	1.06346	0.192747	2.49372	0.028027	2.25559	0.904508	0.99563	178.188	3.96415	178.97	4.09184	189.289	24.7676	178.188	2.37849
SR6-Spot 40	381.391	137468	0.40538	20.2728	0.943583	0.190635	3.06185	0.0280295	2.91283	0.95133	1.00583	178.204	5.1197	177.171	4.97785	163.386	22.0492	178.204	3.07182
SR6-Spot 217	562.565	78373.7	0.679607	19.9412	1.14415	0.194017	2.60083	0.0280601	2.33565	0.898039	0.990805	178.395	4.10956	180.051	4.29115	201.828	26.573	178.395	2.46574
SR6-Spot 266	177.49	11737.1	1.39097	19.901	1.27801	0.19449	2.81912	0.0280718	2.51279	0.891339	0.989005	178.469	4.42305	180.453	4.66081	206.541	29.6568	178.469	2.65383
SR6-Spot 175	454.126	75818.7	0.550417	19.9982	0.988126	0.19361	2.94181	0.0280813	2.7709	0.941901	0.993455	178.529	4.87898	179.705	4.84523	195.225	22.9714	178.529	2.92739
SR6-Spot 181	732.282	96190.6	0.572112	20.0425	0.96357	0.193303	2.94129	0.0280989	2.77898	0.944816	0.995514	178.639	4.89619	179.444	4.83793	190.082	22.4176	178.639	2.93771
SR6-Spot 71	322.742	12093.2	1.16735	20.5412	1.4005	0.1887	3.03554	0.0281122	2.69316	0.887209	1.01825	178.723	4.74717	175.519	4.89292	132.554	32.9079	178.723	2.8483
SR6-Spot 295	663.524	90454.1	0.559423	20.0435	0.976126	0.193484	2.24012	0.0281267	2.01627	0.90007	0.995631	178.813	3.55581	179.598	3.68751	189.958	22.71	178.813	2.13349
SR6-Spot 127	534.129	65520	0.5568	19.943	1.16373	0.194544	3.03654	0.0281389	2.80469	0.923647	0.991083	178.89	4.94833	180.499	5.02144	201.618	27.0233	178.89	2.969
SR6-Spot 162	330.547	98129.5	0.432942	20.055	1.34412	0.193772	2.69183	0.0281846	2.33223	0.86641	0.996298	179.177	4.12126	179.842	4.43658	188.578	31.2837	179.177	2.47276
SR6-Spot 195	526.436	63093.5	0.600018	19.7583	0.771183	0.1969	2.47151	0.0282158	2.34811	0.950073	0.982864	179.372	4.1538	182.499	4.1284	223.169	17.8254	179.372	2.49228
SR6-Spot 47	229.463	12993.4	0.619481	20.2989	1.14723	0.191684	2.82046	0.02822	2.5766	0.913538	1.00749	179.398	4.55864	178.065	4.60657	160.38	26.8358	179.398	2.73519
SR6-Spot 265	453.412	15088	0.526954	20.4028	1.19384	0.190756	2.594	0.0282271	2.30295	0.887799	1.01223	179.443	4.07548	177.274	4.21945	148.464	27.975	179.443	2.44529
SR6-Spot 87	825.704	134118	0.774453	19.8953	0.93584	0.195971	2.87483	0.0282775	2.71824	0.945532	0.989257	179.759	4.81878	181.711	4.78316	207.194	21.7053	179.759	2.89127
SR6-Spot 306	275.202	35233.1	0.412945	19.8291	1.54357	0.196686	2.79041	0.0282862	2.3246	0.833069	0.98626	179.813	4.12218	182.318	4.65687	214.888	35.75	179.813	2.47331
SR6-Spot 156	792.32	79768.4	2.22445	20.0015	0.988795	0.194992	2.93704	0.0282865	2.76559	0.941625	0.994112	179.815	4.90422	180.88	4.86625	194.839	22.9846	179.815	2.94253
SR6-Spot 262	310.937	31866.3	0.662916	19.7695	1.3991	0.197349	2.93872	0.0282962	2.58429	0.879395	0.983571	179.876	4.58427	182.88	4.91819	221.898	32.3759	179.876	2.75056
SR6-Spot 298	264.457	13541.8	0.86729	20.1626	1.4285	0.19356	2.84472	0.0283048	2.46005	0.864776	1.00149	179.93	4.36515	179.662	4.68429	176.119	33.3184	179.93	2.61909
SR6-Spot 155	398.243	26434.8	0.418576	19.7319	1.36076	0.197844	2.76483	0.0283133	2.40678	0.870501	0.981903	179.983	4.27189	183.3	4.63686	226.256	31.4281	179.983	2.56314
SR6-Spot 94	311.19	38625.1	0.843129	19.832	1.32477	0.197222	3.21458	0.0283675	2.92891	0.911133	0.986596	180.323	5.20832	182.773	5.37699	214.584	30.6933	180.323	3.12499
SR6-Spot 80	444.427	35462.3	0.460027	19.9415	1.24868	0.196211	2.39679	0.0283779	2.04583	0.853569	0.991603	180.388	3.63927	181.915	3.99189	201.806	28.9888	180.388	2.18356
SR6-Spot 70	1713.87	67951.2	0.877725	20.2807	0.772619	0.193024	2.04183	0.0283919	1.89001	0.925644	1.00708	180.476	3.36371	179.207	3.3544	162.479	18.0658	180.476	2.01822
SR6-Spot 271	668.792	31666.1	0.64424	19.7956	0.926784	0.197935	2.93287	0.0284177	2.78258	0.948759	0.985061	180.638	4.95663	183.377	4.92056	218.802	21.4399	180.638	2.97398
SR6-Spot 148	453.469	91915.3	0.547716	19.9375	1.01659	0.19655	2.51636	0.0284212	2.30187	0.914762	0.99153	180.66	4.10082	182.203	4.19708	202.246	23.6026	180.66	2.46049
SR6-Spot 285	385.43	13702.4	0.7599	18.0918	2.58763	0.216803	3.5489	0.0284477	2.42875	0.684369	0.907551	180.826	4.33079	199.246	6.42059	423.285	57.7521	180.826	2.59847
SR6-Spot 300	285.381	14170.4	0.378809	20.1697	1.49288	0.194615	3.52125	0.0284692	3.18912	0.90568	1.00222	180.96	5.6908	180.559	5.82478	175.294	34.838	180.96	3.41448
SR6-Spot 237	275.287	16432.4	0.782691	19.0699	1.43636	0.205853	3.07035	0.0284712	2.71365	0.883825	0.952152	180.973	4.84268	190.067	5.32212	304.563	32.7418	180.973	2.90561
SR6-Spot 4	422.095	88519.3	0.84896	19.7705	0.955507	0.198632	3.22402	0.0284816	3.07917	0.955073	0.984075	181.038	5.49693	183.968	5.42493	221.78	22.0967	181.038	3.29816
SR6-Spot 278	186.509	13585.8	0.593102	20.5267	1.62432	0.191583	3.2158	0.0285216	2.77542	0.863057	1.0186	181.289	4.96144	177.979	5.24996	134.216	38.177	181.289	2.97686
SR6-Spot 56	220.281	12001.7	0.758755	16.7312	3.79882	0.235256	6.52237	0.0285475	5.30191	0.812882	0.845814	181.451	9.48624	214.528	12.6137	595.179	82.3421	181.451	5.69175
SR6-Spot 3	250.799	13156.2	0.512802	19.3249	1.80657	0.203705	2.82889	0.0285507	2.17691	0.769527	0.963958	181.471	3.89538	188.256	4.86107	274.218	41.373	181.471	2.33723
SR6-Spot 21	178.513	95227.7	0.602786	19.5483	1.41888	0.201518	3.15908	0.0285707	2.82252	0.89346	0.974179	181.597	5.05408	186.41	5.37996	247.845	32.6781	181.597	3.03245
SR6-Spot 53	257.682	49318.2	0.511895	20.1897	1.28441	0.195236	2.53975	0.0285884	2.19103	0.862696	1.00343	181.707	3.92567	181.087	4.21239	172.978	29.9707	181.707	2.3554
SR6-Spot 95	378.816	56546.9	0.460568	20.1102	1.15401	0.196229	2.51096	0.0286205	2.23006	0.888131	0.999881	181.909	3.99998	181.93	4.18236	182.188	26.8783	181.909	2.39999
SR6-Spot 98	453.858	82466.9	0.438459	20.0885	0.841853	0.196455	2.50656	0.0286227	2.36095	0.941912	0.998902	181.922	4.23507	182.122	4.17904	184.696	19.6056	181.922	2.54104
SR6-Spot 18	243.439	11042.1	0.322324	20.0721	1.03206	0.196619	2.76485	0.0286231	2.565	0.927719	0.998153	181.925	4.60114	182.261	4.61289	186.605	24.0441	181.925	2.76068
SR6-Spot 160	175.284	113923	1.08355	20.1493	1.7222	0.195906	3.43731	0.028629	2.97475	0.865429	1.00168	181.962	5.33722	181.656	5.71746	177.655	40.1602	181.962	3.20233
SR6-Spot 256	192.435	38349.8	0.554117	19.8193	1.4861	0.199281	2.58753	0.0286452	2.11821	0.818622	0.986702	182.064	3.80254	184.518	4.36578	216.034	34.412	182.064	2.28152
SR6-Spot 136	511.149	65073.4	0.598965	19.9692	0.850636	0.197836	2.72655	0.0286526	2.59047	0.950088	0.993542	182.11	4.65149	183.294	4.57252	198.563	19.7645	182.11	2.79089
SR6-Spot 139	531.906	28308.8	0.480088	20.1392	1.25906	0.196219	2.61324	0.0286604	2.28993	0.876282	1.0013	182.159	4.11293	181.922	4.35253	178.821	29.3752	182.159	2.46776
SR6-Spot 193	261.372	71956.1	0.348091	20.1913	1.22105	0.195713	2.67932	0.0286605	2.38491	0.890118	1.00367	182.159	4.28353	181.492	4.45297	172.798	28.5176	182.159	2.57012
SR6-Spot 73	467.969	16925.5	0.55068	17.9748	1.32148	0.220264	2.74988	0.0287149	2.41154	0.876962	0.902887	182.5	4.33935	202.13	5.04008	437.745	29.427	182.5	2.60361
SR6-Spot 297	326.689	77817.2	0.351336	18.1259	2.40026	0.218493	3.01324	0.0287233	1.82165	0.604546	0.909787	182.553	3.27882	200.654	5.48633	419.088	53.618	182.553	1.96729
SR6-Spot 63	457.197	23141.4	0.725945	19.1074	1.52104	0.207315	2.90556	0.0287297	2.47563	0.852031	0.954499	182.593	4.45691	191.297	5.0661	300.13	34.7034	182.593	2.67414
SR6-Spot 274	253.644	1.04083e+06	0.609928	19.7588	1.25029	0.200487	2.73026	0.0287307	2.42716	0.888984	0.98416	182.599	4.3698	185.538	4.62985	223.131	28.9136	182.599	2.62188
SR6-Spot 11	205.525	17377.1	0.761581	20.223	1.42499	0.195957	2.56638	0.0287413	2.13441	0.83168	1.00532	182.666	3.8441	181.7	4.26971	169.133	33.2897	182.666	2.30646
SR6-Spot 163	261.108	25041.1	0.389087	20.1039	1.37974	0.197138	2.86615	0.0287441	2.5122	0.876506	0.999902	182.683	4.52495	182.701	4.79245	182.911	32.1325	182.683	2.71497
SR6-Spot 106	529.619	64617.5	0.505213	20.0675	1.05502	0.197503	2.99107	0.0287452	2.79882	0.935728	0.998248	182.69	5.0414	183.011	5.00906	187.13	24.559	182.69	3.02484
SR6-Spot 164	536.596	52850.7	0.559969	19.7394	0.963633	0.200877	2.59665	0.0287583	2.41123	0.92859	0.983345	182.772	4.34516	185.868	4.4104	225.369	22.2676	182.772	2.6071
SR6-Spot 166	447.283	35917.7	0.81879	20.4383	1.0029	0.194207	2.57587	0.0287878	2.37262	0.921092	1.01523	182.957	4.27985	180.212	4.25345	144.345	23.53	182.957	2.56791
SR6-Spot 264	170.507	30945.9	0.517011	20.1848	1.69926	0.196928	3.35067	0.0288291	2.88782	0.861864	1.00379	183.216	5.21646	182.524	5.59766	173.556	39.6655	183.216	3.12988
SR6-Spot 273	195.217	12202.8	0.805408	18.9596	1.77082	0.209659	3.04867	0.0288298	2.48165	0.814011	0.948019	183.22	4.48288	193.266	5.36531	317.764	40.2388	183.22	2.68973
SR6-Spot 294	318.874	69006	1.13981	20.0182	1.47591	0.199043	2.99002	0.0288982	2.60036	0.869682	0.99638	183.649	4.70815	184.316	5.03986	192.897	34.3435	183.649	2.82489
SR6-Spot 248	575.149	35307	0.552667	20.4607	1.92685	0.194847	8.06618	0.0289142	7.83266	0.971049	1.01656	183.749	14.1893	180.756	13.3568	141.805	45.2099	183.749	8.51356
SR6-Spot 225	445.022	24298.1	0.511266	20.1598	1.1013	0.19822	2.5136	0.0289823	2.2595	0.89891	1.00303	184.176	4.10258	183.619	4.22222	176.441	25.6747	184.176	2.46155
SR6-Spot 201	687.001	559535	0.27128	19.8337	1.24022	0.20154	2.65376	0.0289911	2.34612	0.884074	0.988209	184.231	4.26109	186.429	4.51978	214.39	28.7493	184.231	2.55665
SR6-Spot 293	331.156	21440.5	0.391332	20.2216	1.22835	0.197759	2.9894	0.0290036	2.72537	0.91168	1.0059	184.309	4.95198	183.229	5.01169	169.295	28.6757	184.309	2.97119
SR6-Spot 109	365.897	192930	1.00413	19.7521	1.11159	0.202573	2.95067	0.0290198	2.73329	0.926326	0.984568	184.41	4.96905	187.301	5.0469	223.926	25.7195	184.41	2.98143
SR6-Spot 118	284.833	10384.2	0.691831	20.7745	1.18899	0.192668	2.87436	0.0290295	2.61692	0.910434	1.03112	184.471	4.75904	178.903	4.71481	105.93	28.1022	184.471	2.85543
SR6-Spot 45	491.135	29798.9	0.768758	20.2367	1.01929	0.197807	2.52282	0.0290321	2.30774	0.914746	1.00665	184.488	4.19716	183.269	4.23032	167.56	23.8333	184.488	2.5183
SR6-Spot 203	238.189	19088	0.486819	19.9912	1.22349	0.200451	2.78105	0.0290633	2.49746	0.898028	0.995555	184.683	4.54695	185.508	4.71526	196.043	28.4464	184.683	2.72817
SR6-Spot 221	342.882	379106	0.665079	19.904	1.29037	0.201441	3.12598	0.0290794	2.84723	0.910827	0.991626	184.784	5.18653	186.344	5.32188	206.184	29.9443	184.784	3.11192
SR6-Spot 210	133.592	50893.8	0.701987	19.0217	1.98997	0.211074	3.80045	0.0291193	3.23782	0.851955	0.95156	185.034	5.9059	194.453	6.72567	310.339	45.3044	185.034	3.54354
SR6-Spot 280	621.523	83444.8	0.804556	20.0842	1.0367	0.200024	2.31975	0.0291363	2.07521	0.894584	0.999967	185.14	3.78741	185.146	3.92614	185.201	24.1468	185.14	2.27245
SR6-Spot 143	169.609	988443	0.62593	19.958	1.51932	0.201528	2.77613	0.029171	2.32348	0.83695	0.994309	185.358	4.24542	186.418	4.72797	199.903	35.3075	185.358	2.54725
SR6-Spot 46	415.472	31234.9	0.88084	19.9244	0.829334	0.201885	2.46382	0.0291734	2.32004	0.941646	0.992786	185.373	4.23948	186.72	4.20225	203.77	19.2464	185.373	2.54369
SR6-Spot 224	294.878	25287.4	0.639538	20.4013	1.4875	0.197545	2.83063	0.0292295	2.40828	0.850794	1.01463	185.724	4.40895	183.047	4.74122	148.635	34.8649	185.724	2.64537
SR6-Spot 9	292.988	41911.9	0.450568	20.1301	1.12025	0.200287	3.01713	0.0292414	2.80145	0.928514	1.00232	185.799	5.13077	185.369	5.11206	179.876	26.1192	185.799	3.07846
SR6-Spot 213	281.406	46950.5	0.590599	19.7263	1.11967	0.204599	2.33223	0.0292717	2.04588	0.877223	0.984014	185.989	3.75075	189.01	4.02221	226.927	25.895	185.989	2.25045
SR6-Spot 19	361.178	98520.7	0.533544	19.718	1.19338	0.205635	2.45529	0.0294076	2.14576	0.873935	0.983971	186.84	3.9516	189.883	4.25223	227.909	27.5684	186.84	2.37096
SR6-Spot 37	408.732	36820.2	0.670055	20.0344	1.27933	0.203015	3.13152	0.0294987	2.85828	0.912744	0.998592	187.41	5.27959	187.675	5.36596	191.025	29.7642	187.41	3.16775
SR6-Spot 189	244.958	13261.7	0.492238	19.5726	1.33352	0.207845	2.73979	0.0295044	2.39337	0.873557	0.97759	187.446	4.42167	191.743	4.78718	244.955	30.6945	187.446	2.653
SR6-Spot 158	518.457	100844	0.952077	19.8631	0.986164	0.204847	2.50186	0.0295104	2.2993	0.919037	0.990827	187.483	4.24872	189.219	4.3191	210.914	22.8784	187.483	2.54923
SR6-Spot 192	391.788	56670.9	0.795552	19.7394	1.26225	0.206173	2.53191	0.0295165	2.19483	0.866869	0.985211	187.522	4.0565	190.336	4.39444	225.373	29.1637	187.522	2.4339
SR6-Spot 123	296.798	23282.4	0.823635	19.9607	1.20827	0.203968	3.03041	0.0295281	2.77911	0.917074	0.995312	187.594	5.13832	188.478	5.21292	199.569	28.08	187.594	3.08299
SR6-Spot 120	501	56574.9	0.64413	19.8215	1.09249	0.205508	2.90386	0.0295437	2.69051	0.92653	0.989017	187.692	4.97706	189.776	5.02652	215.774	25.2831	187.692	2.98624
SR6-Spot 26	316.079	94781.2	0.777095	19.8563	1.08028	0.205209	2.74649	0.0295523	2.52511	0.919396	0.990618	187.746	4.67242	189.524	4.74837	211.712	25.0423	187.746	2.80345
SR6-Spot 77	256.845	21843.3	0.610931	20.1339	1.37064	0.203099	2.27407	0.0296575	1.8146	0.797951	1.00351	188.404	3.3693	187.745	3.89801	179.442	31.9489	188.404	2.02158
SR6-Spot 89	205.857	12402.5	0.621374	20.6337	1.27719	0.198214	2.9247	0.0296627	2.6311	0.899612	1.02626	188.437	4.88619	183.614	4.91265	122.018	30.0856	188.437	2.93171
SR6-Spot 238	559.41	50083.9	0.569927	20.3421	1.01068	0.201215	3.20365	0.0296862	3.04005	0.948933	1.01305	188.584	5.65001	186.154	5.44903	155.428	23.6473	188.584	3.39001
SR6-Spot 307	255.032	62926	0.511858	19.76	1.42209	0.207146	4.60952	0.0296867	4.38467	0.95122	0.986568	188.587	8.14915	191.155	8.03177	222.998	32.8656	188.587	4.88949
SR6-Spot 284	409.432	88703.3	0.757908	19.7369	1.03734	0.207527	2.47389	0.0297065	2.2459	0.907841	0.985563	188.711	4.17682	191.475	4.31708	225.716	23.9797	188.711	2.50609
SR6-Spot 22	421.509	75768.5	0.567224	20.0766	0.89907	0.204266	2.74768	0.029743	2.59643	0.944952	1.00111	188.94	4.83449	188.73	4.73231	186.08	20.942	188.94	2.90069
SR6-Spot 267	460.999	31733.1	0.494431	19.9323	1.15337	0.205804	2.76744	0.0297515	2.51564	0.909015	0.994566	188.993	4.68537	190.026	4.7961	202.854	26.7709	188.993	2.81122
SR6-Spot 309	567.689	23137.7	0.670852	20.1489	1.01666	0.203623	2.92657	0.0297562	2.7443	0.937721	1.00444	189.022	5.11202	188.187	5.02722	177.7	23.7157	189.022	3.06721
SR6-Spot 147	227.361	47039.4	0.689293	19.9941	1.70884	0.205456	2.81768	0.0297933	2.24035	0.795105	0.997485	189.255	4.17834	189.732	4.87632	195.697	39.7177	189.255	2.50701
SR6-Spot 103	319.025	35096.1	0.570398	19.6531	1.21621	0.209197	2.409	0.0298184	2.07945	0.863201	0.982025	189.412	3.88141	192.879	4.23182	235.54	28.0484	189.412	2.32885
SR6-Spot 15	382.229	86572.3	0.444999	19.817	1.18936	0.208064	2.56698	0.0299043	2.27482	0.886186	0.989695	189.949	4.25796	191.927	4.48913	216.314	27.5476	189.949	2.55478
SR6-Spot 122	258.689	61219.4	0.363319	16.3554	3.17447	0.252126	4.22604	0.0299073	2.78965	0.66011	0.832093	189.968	5.22213	228.302	8.6406	644.249	68.2616	189.968	3.13328
SR6-Spot 270	400.53	67637.5	0.985904	19.8661	1.1944	0.207827	2.69013	0.0299443	2.41043	0.89603	0.992029	190.2	4.51766	191.728	4.70006	210.594	27.6974	190.2	2.7106
SR6-Spot 104	497.14	49197.8	0.612387	19.9606	0.842476	0.206845	2.39256	0.0299446	2.23932	0.935953	0.996331	190.201	4.197	190.902	4.16378	199.575	19.5807	190.201	2.5182
SR6-Spot 174	371.067	50772	0.417434	19.9287	1.38678	0.207312	2.55039	0.0299641	2.14041	0.839247	0.994925	190.324	4.01416	191.295	4.44677	203.292	32.2094	190.324	2.4085
SR6-Spot 96	386.21	62721.8	0.857663	19.9089	1.22399	0.207567	2.53573	0.0299712	2.22076	0.875787	0.994042	190.368	4.16581	191.509	4.42571	205.617	28.4185	190.368	2.49949
SR6-Spot 55	1171.53	97375.5	1.0493	19.4371	0.966267	0.212749	2.85128	0.0299915	2.68256	0.940826	0.972623	190.495	5.03537	195.857	5.0789	260.956	22.2003	190.495	3.02122
SR6-Spot 35	337.266	23385.5	0.826998	20.1357	1.04989	0.205765	2.60767	0.0300495	2.38698	0.915369	1.00456	190.858	4.48896	189.992	4.51849	179.228	24.4513	190.858	2.69337
SR6-Spot 178	529.455	34031	1.02965	19.858	1.03042	0.208737	2.4176	0.030063	2.18701	0.904622	0.99195	190.942	4.11469	192.492	4.2392	211.519	23.9009	190.942	2.46882
SR6-Spot 39	412.646	85182.6	0.571325	19.8556	1.26009	0.208822	2.75284	0.0300717	2.44751	0.889085	0.991864	190.997	4.6061	192.564	4.82868	211.787	29.2121	190.997	2.76366
SR6-Spot 186	274.774	33504.4	0.735008	19.7436	1.20608	0.210295	2.7849	0.0301129	2.51019	0.901356	0.986867	191.255	4.73034	193.8	4.91338	224.919	27.9004	191.255	2.8382
SR6-Spot 59	323.558	35831	0.786483	19.5824	1.18563	0.21203	2.85748	0.0301136	2.5999	0.909858	0.979537	191.259	4.89951	195.255	5.07576	243.821	27.3003	191.259	2.93971
SR6-Spot 275	1127.72	50217.5	0.682605	19.8588	0.753033	0.20925	2.25831	0.0301382	2.12906	0.942768	0.992172	191.413	4.01541	192.924	3.96795	211.417	17.4287	191.413	2.40924
SR6-Spot 247	403.292	27068.1	0.504634	19.5575	0.894333	0.212943	2.32518	0.0302047	2.14631	0.923071	0.978624	191.829	4.05659	196.019	4.14488	246.779	20.58	191.829	2.43396
SR6-Spot 212	483.813	209850	0.65153	19.8377	1.16804	0.210254	2.37424	0.0302505	2.06705	0.870616	0.991487	192.116	3.91255	193.766	4.18817	213.927	27.0571	192.116	2.34753
SR6-Spot 48	204.064	27455.3	0.504317	20.1299	1.28518	0.208099	2.94413	0.0303815	2.64881	0.899692	1.0051	192.936	5.03479	191.956	5.14941	179.903	29.9339	192.936	3.02087
SR6-Spot 86	445.939	55016.8	0.56474	20.0159	0.919313	0.209664	2.50565	0.0304367	2.33091	0.930262	1.00005	193.281	4.43833	193.271	4.40973	193.173	21.3988	193.281	2.663
SR6-Spot 289	306.035	37514.8	0.529233	19.5666	1.35406	0.214512	2.77284	0.0304414	2.41975	0.87266	0.979622	193.31	4.60819	197.332	4.97288	245.703	31.1857	193.31	2.76491
SR6-Spot 75	417.052	25619.9	1.12064	19.8908	1.13463	0.211092	2.83195	0.0304525	2.59471	0.916229	0.994401	193.38	4.94314	194.469	5.01202	207.688	26.3346	193.38	2.96588
SR6-Spot 7	494.44	30010.1	0.669207	19.9782	1.10037	0.210297	2.39403	0.0304711	2.12616	0.888109	0.998424	193.496	4.0529	193.802	4.22379	197.5	25.5727	193.496	2.43174
SR6-Spot 308	407.939	19620.6	0.602396	19.9565	0.940315	0.210551	2.12	0.0304749	1.90005	0.896252	0.997446	193.52	3.62232	194.015	3.74405	200.025	21.8594	193.52	2.17339
SR6-Spot 142	366.881	44294.2	0.523862	19.9362	1.3267	0.210836	3.24311	0.0304849	2.95933	0.912497	0.996543	193.582	5.64357	194.254	5.73396	202.405	30.8196	193.582	3.38614
SR6-Spot 242	475.405	61649.3	0.809351	19.9389	1.31421	0.211223	2.647	0.0305451	2.2977	0.868043	0.996813	193.959	4.39022	194.579	4.6871	202.128	30.5088	193.959	2.63413
SR6-Spot 28	440.313	47821.7	0.492373	19.7474	0.83311	0.213275	2.79479	0.0305456	2.66773	0.954537	0.988105	193.962	5.09732	196.297	4.98842	224.453	19.2768	193.962	3.05839
SR6-Spot 283	188.747	3.44676e+07	0.40568	19.6827	1.49647	0.214443	3.08833	0.0306122	2.70155	0.874759	0.985322	194.379	5.17285	197.274	5.53724	232.023	34.5522	194.379	3.10371
SR6-Spot 252	285.767	10636.4	0.458385	20.6044	1.16883	0.204907	2.49194	0.0306207	2.20082	0.883174	1.02727	194.432	4.21521	189.27	4.30302	125.328	27.5002	194.432	2.52912
SR6-Spot 149	581.703	41716	0.48773	19.888	0.954752	0.21238	2.11354	0.030634	1.88561	0.892155	0.994716	194.515	3.613	195.548	3.7594	208.012	22.1398	194.515	2.1678
SR6-Spot 145	297.209	91298.1	0.543117	19.472	1.43746	0.216962	3.4278	0.0306403	3.11183	0.907823	0.975805	194.554	5.96376	199.378	6.20523	256.825	33.0261	194.554	3.57826
SR6-Spot 88	688.733	68370.9	0.667678	19.4843	1.22067	0.216905	2.59668	0.0306517	2.29188	0.882619	0.976395	194.626	4.39392	199.331	4.69964	255.364	28.0644	194.626	2.63635
SR6-Spot 177	131.726	26842.2	0.455627	16.9642	2.56039	0.249409	4.09215	0.0306863	3.19219	0.780077	0.861768	194.842	6.12668	226.096	8.29466	565.14	55.7481	194.842	3.67601
SR6-Spot 105	137.357	64930.7	0.702441	20.3321	1.67458	0.208633	2.8298	0.0307656	2.28113	0.80611	1.01524	195.338	4.38908	192.405	4.95996	156.565	39.224	195.338	2.63345
SR6-Spot 211	347.248	66086.5	0.591751	19.8358	1.29758	0.21428	3.40852	0.0308269	3.15187	0.924704	0.992815	195.721	6.07618	197.138	6.1075	214.146	30.0594	195.721	3.64571
SR6-Spot 312	397.858	46723.8	0.302838	19.8669	1.05074	0.214344	2.65098	0.0308845	2.43385	0.918096	0.994373	196.082	4.70049	197.191	4.75126	210.489	24.377	196.082	2.82029
SR6-Spot 205	367.888	28668.5	0.789554	20.3358	1.26337	0.20965	2.86302	0.030921	2.56919	0.897373	1.01579	196.31	4.96757	193.259	5.0384	156.181	29.5546	196.31	2.98054
SR6-Spot 152	652.113	52172.7	0.787707	20.0541	0.952981	0.212635	2.28155	0.0309269	2.07299	0.90859	1.00299	196.347	4.00889	195.761	4.06225	188.687	22.1771	196.347	2.40534
SR6-Spot 151	177.461	50590	0.494049	20.2531	1.34282	0.210707	2.66619	0.0309505	2.30335	0.86391	1.0121	196.494	4.45768	194.146	4.71155	165.666	31.3689	196.494	2.67461
SR6-Spot 137	174.041	14606.1	0.484499	20.293	1.74948	0.210731	3.21957	0.0310151	2.70277	0.839481	1.01407	196.898	5.24125	194.166	5.69001	161.091	40.928	196.898	3.14475
SR6-Spot 150	443.068	27394.5	0.761546	20.0661	0.980905	0.213201	2.6717	0.0310279	2.48512	0.930163	1.00379	196.978	4.82111	196.235	4.76736	187.291	22.8325	196.978	2.89267
SR6-Spot 92	228.298	31348.6	0.497369	19.6643	1.27823	0.217599	2.88296	0.0310336	2.5841	0.896336	0.985518	197.014	5.01405	199.909	5.23149	234.226	29.4784	197.014	3.00843
SR6-Spot 172	483.712	214102	0.362442	19.803	1.01902	0.216095	2.65753	0.0310365	2.4544	0.923563	0.991834	197.032	4.7628	198.654	4.795	217.982	23.5646	197.032	2.85768
SR6-Spot 255	570.23	29287.4	0.478356	20.2224	0.801009	0.212269	2.68564	0.0311327	2.56341	0.954486	1.01115	197.634	4.98929	195.455	4.77495	169.211	18.7071	197.634	2.99357
SR6-Spot 51	331.942	20492.4	0.443101	19.842	1.26846	0.216869	2.35594	0.031209	1.98532	0.842685	0.994032	198.111	3.87331	199.3	4.26334	213.422	29.3854	198.111	2.32398
SR6-Spot 241	471.843	26429.3	0.655243	19.7762	1.06736	0.217785	2.66959	0.0312369	2.44693	0.916593	0.991106	198.285	4.77804	200.065	4.84769	221.07	24.684	198.285	2.86682
SR6-Spot 243	281.86	37495.7	0.627972	19.4534	0.994947	0.2218	2.77785	0.0312936	2.59356	0.933656	0.976562	198.639	5.07325	203.407	5.1204	259.026	22.875	198.639	3.04395
SR6-Spot 208	416.148	24631.1	0.369777	20.1253	0.987439	0.214574	2.74993	0.0313198	2.56653	0.933308	1.00719	198.803	5.02447	197.384	4.93297	180.434	23.0306	198.803	3.01468
SR6-Spot 66	571.303	62461.3	0.491605	19.5937	0.991986	0.221153	2.83529	0.0314274	2.6561	0.936798	0.983273	199.475	5.21713	202.869	5.2138	242.469	22.8432	199.475	3.13028
SR6-Spot 260	389.485	17778.2	0.508158	20.2287	0.764008	0.215199	2.56439	0.0315723	2.44794	0.954588	1.01251	200.382	4.82976	197.906	4.61116	168.479	17.8229	200.382	2.89786
SR6-Spot 69	410.069	25499.1	0.399807	20.3388	1.17693	0.215518	2.07148	0.0317912	1.70466	0.822919	1.01805	201.749	3.38588	198.173	3.72937	155.802	27.5315	201.749	2.03153
SR6-Spot 239	304.047	56913.1	0.634934	19.5504	1.2761	0.225504	3.47285	0.0319749	3.2299	0.930044	0.982645	202.897	6.45132	206.48	6.48876	247.599	29.3886	202.897	3.87079
SR6-Spot 227	190.981	87867.7	0.44934	19.272	1.07218	0.279056	2.69757	0.0390047	2.47534	0.917618	0.987006	246.661	5.99035	249.908	5.97597	280.529	24.5445	246.661	3.59421
SR6-Spot 234	379.715	52407.3	0.601751	19.2547	1.19801	0.287299	3.23107	0.0401208	3.00076	0.928721	0.988887	253.582	7.46165	256.431	7.32214	282.591	27.4241	253.582	4.47699
SR6-Spot 100	538.504	99159.7	1.02331	19.7015	0.967723	0.284127	2.52235	0.0405986	2.32933	0.923475	1.0103	256.542	5.85837	253.926	5.66688	229.809	22.3714	256.542	3.51502
SR6-Spot 41	243.349	144648	1.29056	19.5878	1.17597	0.293222	2.61504	0.0416564	2.3357	0.893181	1.00766	263.092	6.02134	261.093	6.02055	243.207	27.0747	263.092	3.6128
SR6-Spot 110	358.048	107661	1.32021	18.8067	1.17954	0.355284	2.8698	0.0484605	2.61619	0.911627	0.988257	305.063	7.79512	308.688	7.63898	336.186	26.7245	305.063	4.67707
SR6-Spot 204	286.116	29175	0.654992	19.219	1.03034	0.352398	2.64214	0.0491206	2.43297	0.920831	1.00847	309.12	7.34332	306.523	6.99071	286.804	23.5497	309.12	4.40599
SR6-Spot 44	366.41	62198.1	0.641175	18.6703	1.1184	0.39144	2.96339	0.0530047	2.74424	0.926047	0.992611	332.943	8.9048	335.421	8.46504	352.621	25.2617	332.943	5.34288
SR6-Spot 311	112.808	34082.2	0.318316	18.2401	1.19983	0.454835	2.72586	0.0601701	2.44759	0.897916	0.989493	376.66	8.95493	380.659	8.65333	405.038	26.8613	376.66	5.37296
SR6-Spot 250	596.335	577504	0.52925	18.0819	0.917838	0.460517	2.64887	0.0603932	2.48477	0.938049	0.982838	378.017	9.12276	384.617	8.48086	424.51	20.4775	378.017	5.47366
SR6-Spot 68	612.683	88574.3	0.0837034	18.2926	0.893257	0.470099	2.36568	0.0623682	2.19055	0.925973	0.996817	390.012	8.2901	391.257	7.68132	398.603	20.02	390.012	4.97406
SR6-Spot 14	300.27	267053	0.316816	18.3748	1.21824	0.469267	4.07474	0.0625376	3.88836	0.954261	1.00091	391.039	14.7531	390.683	13.2152	388.55	27.3524	391.039	8.85184
SR6-Spot 209	424.941	45868	0.888866	18.43	0.909665	0.478093	2.62526	0.0639051	2.46262	0.938048	1.00647	399.331	9.53559	396.763	8.62229	381.813	20.4471	399.331	5.72136
SR6-Spot 159	576.704	303488	0.483729	17.9769	0.868488	0.490411	2.81367	0.0639403	2.67628	0.95117	0.986064	399.544	10.3683	405.191	9.40091	437.485	19.3451	399.544	6.22098
SR6-Spot 279	263.102	58123.7	0.350723	18.1416	0.950368	0.491042	2.59571	0.0646088	2.41548	0.930564	0.967489	403.593	9.44981	405.62	8.68012	417.156	21.2303	403.593	9.44981
SR6-Spot 52	197.37	85261.3	0.135411	18.2083	0.920125	0.493984	3.09444	0.0652351	2.95447	0.954769	0.996188	407.385	11.6637	407.622	10.3895	408.944	20.5847	407.385	11.6637
SR6-Spot 16	208.938	25595.8	0.557669	18.1708	1.33856	0.497149	2.69977	0.0655178	2.34457	0.868433	0.989214	409.095	9.29352	409.771	9.10311	413.556	29.9223	409.095	9.29352
SR6-Spot 83	366.997	36070.2	0.116223	18.2454	0.855094	0.49663	2.2494	0.0657181	2.08054	0.924928	1.01462	410.307	8.27059	409.419	7.57921	404.394	19.1455	410.307	8.27059
SR6-Spot 302	74.8487	22441.3	1.14702	18.144	1.16989	0.506867	2.98462	0.0667	2.74579	0.919977	0.998537	416.244	11.068	416.34	10.1942	416.853	26.1361	416.244	11.068
SR6-Spot 124	351.116	71535.9	0.453457	17.8986	0.809943	0.514081	3.00436	0.0667344	2.89313	0.962975	0.931255	416.452	11.6676	421.19	10.3581	447.194	18.0203	416.452	11.6676
SR6-Spot 194	428.318	57623	0.662776	17.9574	0.835274	0.513175	2.08536	0.0668355	1.91077	0.916279	0.948073	417.062	7.71679	420.582	7.18116	439.905	18.5962	417.062	7.71679
SR6-Spot 258	169.911	16693	0.841407	18.1837	1.2305	0.50774	3.25384	0.0669611	3.0122	0.925737	1.01421	417.821	12.1864	416.928	11.1265	411.968	27.5137	417.821	12.1864
SR6-Spot 13	397.601	71456.7	0.459841	18.0711	0.813574	0.51243	1.99332	0.0671612	1.81973	0.912915	0.984012	419.03	7.38267	420.082	6.8576	425.838	18.1477	419.03	7.38267
SR6-Spot 134	179.198	59736.9	0.370684	18.0602	1.21109	0.522356	3.06025	0.0684206	2.81041	0.918359	0.99869	426.633	11.602	426.724	10.6623	427.193	27.0287	426.633	11.602
SR6-Spot 214	531.95	70564.6	0.701876	18.1578	0.768289	0.527043	2.59068	0.0694076	2.47414	0.955015	1.04198	432.586	10.3516	429.845	9.07925	415.159	17.1695	432.586	10.3516
SR6-Spot 223	109.156	100679	0.219305	17.7791	1.27895	0.5508	5.41722	0.0710235	5.26408	0.971731	0.957264	442.319	22.5033	445.521	19.5388	462.066	28.3637	442.319	22.5033
SR6-Spot 183	746.941	67217.8	0.577592	17.9588	0.667298	0.548327	2.80064	0.0714192	2.71998	0.9712	1.0113	444.7	11.688	443.9	10.0711	439.731	14.86	444.7	11.688
SR6-Spot 196	1123.6	58173.5	1.73384	17.9598	0.71551	0.550033	2.2547	0.0716454	2.13815	0.948311	1.01468	446.061	9.21499	445.018	8.12409	439.608	15.9281	446.061	9.21499
SR6-Spot 168	774.911	160943	0.411246	17.5185	0.854686	0.571516	2.28463	0.0726146	2.11874	0.927387	0.913421	451.889	9.24646	458.995	8.43656	494.721	18.8415	451.889	9.24646
SR6-Spot 76	872.323	67688.6	0.669644	17.7701	0.951828	0.573006	2.86764	0.0738497	2.70506	0.943307	0.991544	459.307	11.9923	459.957	10.6072	463.225	21.1156	459.307	11.9923
SR6-Spot 146	154.739	33856.7	0.563268	17.6971	1.21017	0.583563	2.76117	0.0749011	2.48184	0.898837	0.985788	465.616	11.1484	466.749	10.3321	472.328	26.7767	465.616	11.1484
SR6-Spot 282	47.1823	12789.5	1.37501	17.8569	1.36152	0.579339	4.0799	0.0750303	3.84602	0.942675	1.03097	466.391	17.304	464.036	15.1974	452.381	30.2515	466.391	17.304
SR6-Spot 135	141.975	110820	0.950608	17.155	0.932116	0.668563	3.05389	0.0831823	2.90816	0.952281	0.952567	515.09	14.3968	519.838	12.4252	540.739	20.3906	515.09	14.3968
SR6-Spot 2	130.109	23361.7	0.717906	16.9625	1.24203	0.702169	2.81554	0.0863833	2.52679	0.897442	0.944722	534.112	12.9519	540.086	11.7937	565.364	27.039	534.112	12.9519
SR6-Spot 115	71.1346	14955.8	0.312076	16.7836	1.35484	0.758447	3.87681	0.0923226	3.63236	0.936946	0.967416	569.259	19.7909	573.114	16.9801	588.432	29.3704	569.259	19.7909
SR6-Spot 276	505.801	58803.3	0.0740775	16.7111	1.00058	0.763851	2.39539	0.0925788	2.17641	0.90858	0.954792	570.77	11.8882	576.229	10.5334	597.795	21.6716	570.77	11.8882
SR6-Spot 64	281.824	108838	0.494039	16.5604	0.934171	0.784871	3.22752	0.0942687	3.08938	0.957197	0.940642	580.734	17.1567	588.258	14.4119	617.38	20.1856	580.734	17.1567
SR6-Spot 296	50.1382	19038.2	1.14124	16.8483	1.56139	0.79866	3.41892	0.0975926	3.04156	0.889626	1.0348	600.285	17.4337	596.073	15.4157	580.097	33.921	600.285	17.4337
SR6-Spot 200	117.142	5.23557e+06	0.830454	15.9182	1.4606	0.847153	3.1391	0.0978033	2.7786	0.885158	0.856616	601.523	15.9579	623.085	14.6192	702.208	31.1141	601.523	15.9579
SR6-Spot 167	155.897	26150	0.869957	16.5093	1.11654	0.833062	3.29375	0.099748	3.09873	0.940791	0.982186	612.932	18.1182	615.309	15.2003	624.048	24.0972	612.932	18.1182
SR6-Spot 218	53.2081	34665.7	0.533937	16.5255	1.49937	0.837314	4.43313	0.100355	4.17187	0.941067	0.991251	616.492	24.5278	617.662	20.5165	621.933	32.3251	616.492	24.5278
SR6-Spot 93	326.676	1.1488e+06	0.886938	16.7089	0.742145	0.838591	2.58967	0.101624	2.48105	0.958056	1.04317	623.92	14.7543	618.368	11.9939	598.098	16.0664	623.92	14.7543
SR6-Spot 74	117.779	34455.3	0.459547	16.3654	1.21544	0.865394	3.27539	0.102716	3.04153	0.9286	0.980349	630.307	18.2636	633.063	15.4302	642.941	26.1339	630.307	18.2636
SR6-Spot 259	147.982	48432.3	0.583425	16.1047	0.957508	0.880153	2.86589	0.102804	2.7012	0.942536	0.931286	630.818	16.2325	641.065	13.6232	677.363	20.4634	630.818	16.2325
SR6-Spot 315	45.5062	33896.4	0.67296	16.3507	1.53673	0.867724	4.63846	0.1029	4.3765	0.943525	0.979082	631.382	26.3225	634.33	21.8847	644.871	33.0256	631.382	26.3225
SR6-Spot 84	405.343	157315	0.224896	16.4563	0.975199	0.863416	2.69999	0.103051	2.51773	0.932494	1.00197	632.262	15.1629	631.986	12.7036	631.021	21.0255	632.262	15.1629
SR6-Spot 226	169.234	17674	0.561059	16.6057	0.968307	0.859702	3.88345	0.103539	3.76079	0.968416	1.03865	635.114	22.7465	629.96	18.2305	611.482	20.9381	635.114	22.7465
SR6-Spot 1	177.716	26297.3	0.270345	16.2555	1.11792	0.891075	3.47046	0.105054	3.28548	0.946698	0.979542	643.959	20.1348	646.947	16.6059	657.408	23.9537	643.959	20.1348
SR6-Spot 144	174.171	71774.4	0.801286	16.3572	0.996196	0.902802	2.65284	0.107103	2.45869	0.926814	1.01845	655.899	15.3332	653.224	12.7809	644.015	21.431	655.899	15.3332
SR6-Spot 30	197.391	429917	1.18018	15.7794	0.686779	1.02156	2.6375	0.116911	2.54651	0.965503	0.988882	712.757	17.1831	714.697	13.534	720.771	14.5761	712.757	17.1831
SR6-Spot 219	141.509	81611.7	0.442613	13.9304	0.987656	1.66063	3.52684	0.167778	3.38572	0.959988	1.02042	999.855	31.3579	993.617	22.355	979.852	20.1204	979.852	20.1204
SR6-Spot 277	198.148	120628	0.151921	13.8843	0.798804	1.66215	2.72544	0.167376	2.60575	0.956084	1.01116	997.637	24.0844	994.195	17.2801	986.629	16.2552	986.629	16.2552
SR6-Spot 61	180.876	96397.8	0.556752	13.7104	0.837634	1.64866	2.89102	0.163938	2.76702	0.957107	0.966834	978.625	25.1236	989.039	18.274	1012.2	16.9727	1012.2	16.9727
SR6-Spot 232	186.065	66447.5	0.235492	13.6811	0.988874	1.74676	2.31511	0.173323	2.09329	0.904186	1.01364	1030.39	19.9336	1025.97	14.9501	1016.52	20.0282	1016.52	20.0282
SR6-Spot 291	103.123	24087.5	0.56937	13.5558	0.895914	1.65094	3.1032	0.162313	2.97106	0.957418	0.9367	969.618	26.7462	989.91	19.6257	1035.14	18.1166	1035.14	18.1166
SR6-Spot 85	92.4957	25564.2	0.566575	13.5528	1.01785	1.69564	3.32552	0.166671	3.16592	0.952008	0.959587	993.741	29.1563	1006.89	21.2434	1035.59	20.5786	1035.59	20.5786
SR6-Spot 245	38.1452	39974.7	0.495695	13.4745	1.11129	1.75616	5.37962	0.171623	5.26359	0.978431	0.974924	1021.05	49.7047	1029.43	34.8186	1047.31	22.4273	1047.31	22.4273
SR6-Spot 165	48.8272	38419.3	0.344597	13.436	1.05892	1.87585	4.02939	0.182797	3.88776	0.964851	1.02769	1082.23	38.733	1072.6	26.6932	1053.08	21.3525	1053.08	21.3525
SR6-Spot 119	78.2893	87285.7	0.293072	13.4213	1.15543	1.76394	3.82571	0.171703	3.64706	0.953302	0.96797	1021.49	34.4528	1032.3	24.7961	1055.29	23.2879	1055.29	23.2879
SR6-Spot 101	294.735	226282	0.655023	13.401	0.805793	1.85064	2.58199	0.179869	2.45303	0.950055	1.00748	1066.26	24.1072	1063.66	17.0217	1058.34	16.2403	1058.34	16.2403
SR6-Spot 215	32.3299	66238.4	0.185458	13.3775	1.47404	1.85777	3.93881	0.180246	3.65259	0.927334	1.00608	1068.32	35.9598	1066.2	26.0049	1061.87	29.6577	1061.87	29.6577
SR6-Spot 79	250.163	52275	0.267483	13.359	0.701574	1.82983	2.24483	0.17729	2.13238	0.949908	0.98826	1052.15	20.7008	1056.22	14.7399	1064.65	14.0986	1064.65	14.0986
SR6-Spot 42	389.177	74510.1	0.327163	13.3423	1.02199	1.81932	2.53124	0.17605	2.31575	0.914868	0.979559	1045.36	22.3472	1052.44	16.5869	1067.17	20.5457	1067.17	20.5457
SR6-Spot 161	1225.86	55259.5	0.493694	13.34	0.740137	1.51749	2.30381	0.146819	2.18168	0.946989	0.827258	883.106	18.0052	937.465	14.1014	1067.51	14.8746	1067.51	14.8746
SR6-Spot 246	439.952	92915.1	0.425154	13.2813	0.735823	1.89433	2.30599	0.182472	2.18544	0.947724	1.00381	1080.46	21.7403	1079.1	15.326	1076.37	14.7532	1076.37	14.7532
SR6-Spot 49	329.948	745952	0.25231	13.2693	0.708418	1.88627	2.43118	0.181532	2.32568	0.956605	0.997373	1075.34	23.0344	1076.27	16.1344	1078.17	14.1991	1078.17	14.1991
SR6-Spot 31	660.981	570399	0.265303	13.2594	0.744438	1.82905	2.1415	0.175893	2.00794	0.937634	0.967421	1044.5	19.362	1055.94	14.0592	1079.67	14.9368	1079.67	14.9368
SR6-Spot 50	308.435	93658.4	0.249486	13.257	0.894779	1.92929	2.83739	0.185499	2.69261	0.948975	1.01568	1096.95	27.1603	1091.29	18.9773	1080.01	17.9351	1080.01	17.9351
SR6-Spot 60	156.395	48147	0.2597	13.2549	0.75647	1.91767	2.87365	0.184352	2.7723	0.964729	1.00957	1090.71	27.8182	1087.26	19.1802	1080.37	15.1773	1080.37	15.1773
SR6-Spot 99	338.66	65278.2	0.275574	13.2538	0.891318	1.91667	2.33704	0.184241	2.1604	0.924415	1.00885	1090.1	21.6671	1086.91	15.5952	1080.54	17.8833	1080.54	17.8833
SR6-Spot 191	333.869	71805.5	0.310835	13.2523	0.907669	1.92441	2.68671	0.184965	2.52874	0.941205	1.01232	1094.04	25.4453	1089.6	17.9537	1080.72	18.2028	1080.72	18.2028
SR6-Spot 131	142.193	34003	0.2996	13.2447	0.84523	1.83341	3.60617	0.176116	3.50571	0.972144	0.966549	1045.72	33.8413	1057.5	23.6976	1081.91	16.9443	1081.91	16.9443
SR6-Spot 253	247.27	88575.2	0.251898	13.243	1.08487	1.88785	2.5466	0.181322	2.30396	0.904719	0.992644	1074.19	22.797	1076.83	16.9053	1082.15	21.7507	1082.15	21.7507
SR6-Spot 240	212.767	131541	0.249306	13.2426	0.931477	1.93345	2.45527	0.185697	2.27172	0.925242	1.01459	1098.02	22.9354	1092.73	16.4332	1082.23	18.6647	1082.23	18.6647
SR6-Spot 169	160.803	38208.3	0.272144	13.2395	0.953279	1.90109	2.97683	0.182546	2.82007	0.947339	0.998324	1080.87	28.063	1081.47	19.8098	1082.68	19.12	1082.68	19.12
SR6-Spot 27	156.409	96722	0.222648	13.2367	0.860315	1.82855	3.04529	0.175543	2.92125	0.959265	0.962595	1042.58	28.1212	1055.76	19.9921	1083.09	17.2437	1083.09	17.2437
SR6-Spot 176	269.983	649438	0.311328	13.2352	0.79425	1.91731	3.71273	0.184043	3.62678	0.97685	1.00527	1089.03	36.341	1087.13	24.781	1083.32	15.9224	1083.32	15.9224
SR6-Spot 199	247.914	61333.1	0.244607	13.2275	0.464941	1.90061	2.11658	0.182336	2.06488	0.975575	0.995585	1079.72	20.528	1081.3	14.083	1084.51	9.3218	1084.51	9.3218
SR6-Spot 198	283.262	91224.5	0.419568	13.2157	0.719791	1.85231	2.61037	0.177543	2.50917	0.961231	0.969841	1053.54	24.3881	1064.25	17.2144	1086.3	14.4103	1086.3	14.4103
SR6-Spot 229	547.236	119200	0.270051	13.2127	0.705396	1.91297	2.44745	0.183315	2.34359	0.957565	0.998456	1085.06	23.4046	1085.62	16.3212	1086.74	14.121	1086.74	14.121
SR6-Spot 78	256.272	98550.2	0.256563	13.1959	0.74098	1.93119	2.96185	0.184826	2.86766	0.968201	1.00366	1093.29	28.8376	1091.95	19.8166	1089.3	14.8377	1089.3	14.8377
SR6-Spot 34	736.337	41969.1	0.0523544	13.1695	0.78561	1.62937	2.52042	0.155627	2.39486	0.950181	0.852862	932.429	20.7906	981.614	15.8601	1093.29	15.727	1093.29	15.727
SR6-Spot 125	248.811	270433	0.261218	13.1668	0.92788	1.91108	3.12583	0.182498	2.98494	0.954926	0.987998	1080.61	29.6971	1084.96	20.8392	1093.73	18.5605	1093.73	18.5605
SR6-Spot 17	172.497	45357.1	0.35423	13.1581	0.888297	1.86959	2.90189	0.178417	2.76259	0.951996	0.966448	1058.32	26.9634	1070.38	19.1995	1095.06	17.7743	1095.06	17.7743
SR6-Spot 62	152.618	80950.4	0.317739	13.1513	1.00351	1.92057	3.69994	0.183188	3.56125	0.962516	0.989324	1084.37	35.5442	1088.27	24.71	1096.07	20.0864	1096.07	20.0864
SR6-Spot 130	169.645	167254	0.267132	13.1501	0.817218	1.89189	2.69499	0.180436	2.5681	0.952916	0.975479	1069.36	25.3054	1078.24	17.9038	1096.24	16.3584	1096.24	16.3584
SR6-Spot 188	250.969	104273	0.313047	13.1501	0.714402	1.8996	2.32174	0.181171	2.20909	0.951483	0.979138	1073.37	21.8429	1080.95	15.4454	1096.24	14.297	1096.24	14.297
SR6-Spot 128	273.926	185818	0.29237	13.1494	0.70299	1.88114	1.88625	0.179402	1.75035	0.927955	0.970217	1063.7	17.1636	1074.46	12.5057	1096.36	14.0657	1096.36	14.0657
SR6-Spot 116	62.5175	103529	0.397074	13.1448	1.17014	1.89436	4.04381	0.180599	3.8708	0.957218	0.975556	1070.24	38.1713	1079.11	26.8801	1097.06	23.4184	1097.06	23.4184
SR6-Spot 113	539.769	123746	0.352656	13.1386	0.837709	1.94369	2.38798	0.185215	2.23622	0.93645	0.997641	1095.4	22.5275	1096.27	16.0115	1097.99	16.7634	1097.99	16.7634
SR6-Spot 287	198.892	63055.8	0.330289	13.0904	0.845487	1.93046	2.51772	0.183278	2.37151	0.941928	0.981438	1084.86	23.6794	1091.7	16.8423	1105.38	16.8986	1105.38	16.8986
SR6-Spot 251	158.745	70558.9	0.237501	13.0523	0.982411	1.91004	2.99616	0.180813	2.83052	0.944716	0.964231	1071.42	27.9406	1084.6	19.9708	1111.16	19.6207	1111.16	19.6207
SR6-Spot 202	263.691	946792	0.25772	13.0322	0.757112	1.90409	2.5399	0.179971	2.42444	0.954539	0.957435	1066.82	23.8376	1082.52	16.9108	1114.25	15.1166	1114.25	15.1166
SR6-Spot 5	162.23	166454	0.37561	13.0151	0.84589	2.05419	2.91575	0.193903	2.79036	0.956993	1.0229	1142.48	29.2144	1133.69	19.915	1116.9	16.8631	1116.9	16.8631
SR6-Spot 38	55.8517	27666.3	0.944732	13.0093	1.15637	1.94867	3.18583	0.183861	2.96856	0.9318	0.973378	1088.04	29.7205	1097.99	21.3811	1117.79	23.0631	1117.79	23.0631
SR6-Spot 185	267.628	47796.2	0.14913	13.0047	0.813094	2.02121	3.01365	0.190639	2.90189	0.962915	1.00568	1124.84	29.9526	1122.67	20.4745	1118.49	16.203	1118.49	16.203
SR6-Spot 314	115.153	52686.7	0.248449	12.9976	0.969235	1.93346	3.04174	0.182263	2.88319	0.947874	0.964044	1079.33	28.6535	1092.74	20.3594	1119.58	19.3459	1119.58	19.3459
SR6-Spot 305	249.809	846999	0.30955	12.9636	0.936077	1.89341	3.26544	0.17802	3.12839	0.958032	0.938999	1056.15	30.4761	1078.78	21.7006	1124.76	18.6648	1124.76	18.6648
SR6-Spot 10	320.094	213280	0.504241	12.8633	0.781021	2.13892	2.68271	0.199547	2.5665	0.956683	1.02861	1172.89	27.5226	1161.47	18.5637	1140.26	15.5316	1140.26	15.5316
SR6-Spot 140	573.956	92711.2	0.327105	12.8082	0.70761	2.03578	2.47821	0.189112	2.37504	0.958369	0.971943	1116.56	24.3493	1127.55	16.8759	1148.79	14.0546	1148.79	14.0546
SR6-Spot 228	186.558	860572	0.364259	12.7489	0.766397	2.11249	2.60177	0.195329	2.48633	0.955631	0.993277	1150.18	26.1915	1152.89	17.9321	1157.97	15.2198	1157.97	15.2198
SR6-Spot 230	176.965	142565	0.452106	12.6887	0.873018	1.91504	3.38555	0.176235	3.27106	0.966181	0.896364	1046.37	31.5943	1086.34	22.5873	1167.35	17.3058	1167.35	17.3058
SR6-Spot 299	171.106	585565	0.216461	12.6312	0.990014	2.10451	2.91733	0.192795	2.74421	0.940658	0.966097	1136.5	28.5935	1150.28	20.083	1176.38	19.5834	1176.38	19.5834
SR6-Spot 138	157.513	23401.1	0.347497	12.573	1.33621	1.86085	2.8538	0.169687	2.52165	0.883612	0.852272	1010.38	23.5821	1067.29	18.8503	1185.52	26.4168	1185.52	26.4168
SR6-Spot 90	538.316	193531	0.429978	12.5395	1.24655	2.09994	2.25341	0.190978	1.87722	0.83306	0.946187	1126.67	19.4051	1148.79	15.5009	1190.75	24.6261	1190.75	24.6261
SR6-Spot 184	153.541	394665	0.251943	12.5243	0.980327	2.14435	4.37962	0.194782	4.26849	0.974626	0.961494	1147.23	44.86	1163.23	30.3361	1193.17	19.3353	1193.17	19.3353
SR6-Spot 102	62.7234	124455	0.258133	12.514	1.06844	2.23455	3.32401	0.202808	3.14761	0.946933	0.996317	1190.39	34.213	1191.95	23.3209	1194.79	21.0794	1194.79	21.0794
SR6-Spot 231	183.772	81339	0.341371	12.3569	0.890935	2.34628	2.92558	0.210275	2.78662	0.952502	1.00871	1230.28	31.2107	1226.43	20.8315	1219.66	17.5222	1219.66	17.5222
SR6-Spot 286	146.459	61352.4	0.546933	12.3475	0.72652	1.93443	3.05437	0.173234	2.96671	0.971299	0.843382	1029.9	28.2386	1093.07	20.4475	1221.16	14.2787	1221.16	14.2787
SR6-Spot 126	76.7788	233592	0.411395	12.1562	1.05145	2.42231	3.58931	0.213563	3.43185	0.956131	0.996811	1247.77	38.9328	1249.24	25.8015	1251.76	20.5708	1251.76	20.5708
SR6-Spot 304	352.011	446758	0.531117	11.9964	0.610837	2.53039	2.66694	0.220159	2.59605	0.973417	1.004	1282.71	30.1963	1280.81	19.4116	1277.61	11.9074	1277.61	11.9074
SR6-Spot 220	27.2483	48712	0.619197	11.6305	1.39527	2.82129	4.21998	0.237982	3.98265	0.943759	1.02876	1376.2	49.3547	1361.21	31.646	1337.73	26.9721	1337.73	26.9721
SR6-Spot 244	964.674	5.97029e+06	0.224137	11.4557	0.860839	2.89341	2.90859	0.240398	2.77828	0.955199	1.01596	1388.77	34.7111	1380.2	21.9513	1366.95	16.5737	1366.95	16.5737
SR6-Spot 132	38.6945	63106.5	0.881543	11.3507	1.03121	2.72359	3.54722	0.224216	3.39403	0.956812	0.941837	1304.11	40.0725	1334.91	26.3509	1384.65	19.8058	1384.65	19.8058
SR6-Spot 254	388.515	72620.1	0.23046	11.2748	0.710771	2.71336	3.39829	0.221879	3.32313	0.977882	0.924344	1291.79	38.9008	1332.12	25.2186	1397.52	13.6262	1397.52	13.6262
SR6-Spot 171	265.853	372662	0.477253	11.2429	0.7026	2.87963	2.67893	0.234808	2.58515	0.964995	0.969124	1359.65	31.6899	1376.59	20.1927	1402.96	13.4596	1402.96	13.4596
SR6-Spot 112	150.063	36236.4	0.554315	11.2295	1.11839	2.618	2.67813	0.213221	2.43343	0.908631	0.886652	1245.96	27.5696	1305.7	19.6797	1405.24	21.4186	1405.24	21.4186
SR6-Spot 43	338.5	117204	0.569589	11.2263	0.962787	2.8224	2.96376	0.229802	2.80302	0.945765	0.948549	1333.46	33.765	1361.5	22.2242	1405.79	18.4371	1405.79	18.4371
SR6-Spot 111	303.496	109181	0.252221	11.0909	0.882278	2.93608	2.60413	0.236175	2.45011	0.940858	0.956472	1366.78	30.176	1391.26	19.7265	1428.98	16.8422	1428.98	16.8422
SR6-Spot 187	449.9	185560	0.259902	11.0615	0.650172	3.23815	2.36658	0.259783	2.27552	0.961521	1.03814	1488.73	30.2494	1466.34	18.362	1434.05	12.4028	1434.05	12.4028
SR6-Spot 121	35.1994	12976.9	0.990052	11.0347	1.11572	3.1346	5.55467	0.250866	5.44146	0.97962	1.00297	1442.94	70.353	1441.22	42.7852	1438.67	21.2708	1438.67	21.2708
SR6-Spot 216	160.734	18609.7	0.383733	11.0343	1.631	2.87723	6.4748	0.230259	6.26601	0.967753	0.928483	1335.86	75.6049	1375.97	48.8252	1438.75	31.0952	1438.75	31.0952
SR6-Spot 107	151.818	79737.4	0.399305	11.0003	0.914378	3.03487	3.69334	0.242127	3.57836	0.968869	0.967543	1397.74	44.9662	1416.43	28.2144	1444.63	17.4181	1444.63	17.4181
SR6-Spot 29	304.742	222023	0.537159	10.7802	0.763423	3.37894	2.68586	0.264184	2.57508	0.958754	1.01901	1511.21	34.6904	1499.52	21.0468	1483.02	14.4676	1483.02	14.4676
SR6-Spot 36	157.118	97664.2	0.500622	10.719	0.739252	3.30215	2.83373	0.256715	2.7356	0.965372	0.98608	1473.01	36.0238	1481.56	22.0886	1493.81	13.9893	1493.81	13.9893
SR6-Spot 129	180.452	75761.2	0.550086	10.6182	0.965671	3.39895	2.89695	0.261756	2.73126	0.942807	0.991504	1498.82	36.5265	1504.15	22.7321	1511.66	18.2292	1511.66	18.2292
SR6-Spot 154	98.9445	466039	0.362298	10.5953	0.798561	3.39195	3.56397	0.260653	3.47335	0.974574	0.985117	1493.18	46.2958	1502.54	27.9554	1515.74	15.0661	1515.74	15.0661
SR6-Spot 207	994.76	65185.3	0.217512	10.4023	0.880403	3.18377	3.15977	0.240197	3.03463	0.960399	0.895101	1387.72	37.8885	1453.23	24.4198	1550.35	16.5361	1550.35	16.5361
SR6-Spot 190	364.483	69896.4	1.05873	10.3787	0.671068	3.74325	2.62174	0.281767	2.5344	0.966687	1.02936	1600.26	35.9152	1580.67	21.0113	1554.61	12.5971	1554.61	12.5971
SR6-Spot 173	169.439	62901.1	0.426618	10.2001	0.860107	3.69712	3.09464	0.273505	2.97272	0.9606	0.982007	1558.57	41.1569	1570.75	24.7376	1587.13	16.0757	1587.13	16.0757
SR6-Spot 33	124.184	238087	0.697378	9.86539	0.817164	3.97403	2.91382	0.284344	2.79689	0.95987	0.978153	1613.2	39.9174	1628.91	23.6425	1649.23	15.1508	1649.23	15.1508
SR6-Spot 197	409.261	349836	0.217274	9.7433	0.692352	3.85765	2.34435	0.272601	2.23978	0.955396	0.929259	1553.99	30.9288	1604.87	18.906	1672.29	12.7987	1672.29	12.7987
SR6-Spot 91	212.327	92807.1	0.901281	9.6502	0.793972	4.13735	2.74866	0.289573	2.63149	0.957372	0.970044	1639.39	38.0923	1661.71	22.4805	1690.02	14.6444	1690.02	14.6444
SR6-Spot 23	162.404	88619.1	0.422516	9.63118	0.715695	4.19681	2.21666	0.293155	2.09795	0.946443	0.97852	1657.28	30.6594	1673.4	18.1785	1693.66	13.1943	1693.66	13.1943
SR6-Spot 180	480.063	774013	0.174862	9.48732	0.711342	4.35234	2.34679	0.299478	2.23638	0.952955	0.981043	1688.72	33.225	1703.34	19.3792	1721.35	13.0701	1721.35	13.0701
SR6-Spot 65	304.044	517047	0.179688	9.47735	0.743432	4.50966	2.07019	0.309977	1.9321	0.933294	1.01004	1740.59	29.4724	1732.75	17.2068	1723.28	13.6564	1723.28	13.6564
SR6-Spot 272	441.47	314098	0.450729	9.40085	0.899132	4.22011	2.65618	0.287733	2.49937	0.940964	0.937885	1630.19	36.0012	1677.94	21.8071	1738.16	16.4841	1738.16	16.4841
SR6-Spot 233	89.2855	108388	0.53563	9.23452	0.682918	4.75154	3.27271	0.318235	3.20066	0.977986	1.00581	1781.1	49.8105	1776.38	27.4595	1770.82	12.4688	1770.82	12.4688
SR6-Spot 281	56.3865	259839	0.496098	8.71986	0.947935	5.26833	3.42987	0.333182	3.29628	0.96105	0.98876	1853.79	53.1061	1863.75	29.2786	1874.86	17.09	1874.86	17.09
SR6-Spot 114	118.938	1.17966e+06	0.92604	8.36403	0.940608	5.73619	2.61657	0.347967	2.44166	0.933152	0.987304	1924.88	40.6319	1936.84	22.6279	1949.63	16.8076	1949.63	16.8076
SR6-Spot 257	103.24	64154.4	0.376607	7.56191	0.549271	7.19652	2.58024	0.394687	2.5211	0.977079	1.0078	2144.53	45.993	2136.07	23.0069	2127.93	9.61744	2127.93	9.61744
SR6-Spot 157	96.1349	80402	0.334499	7.54572	0.838288	6.82653	3.08796	0.373594	2.972	0.962447	0.959941	2046.29	52.1096	2089.17	27.3551	2131.68	14.672	2131.68	14.672
SR6-Spot 25	79.8379	66512.1	0.623439	6.66612	0.968869	7.15515	3.97086	0.345932	3.85085	0.969777	0.816327	1915.14	63.8052	2130.93	35.3897	2346.05	16.5671	2346.05	16.5671
SR6-Spot 108	45.8262	77575.1	0.291662	4.94083	0.511667	15.5232	3.30884	0.556262	3.26904	0.987971	1.00196	2851.16	75.3278	2847.91	31.5743	2845.6	8.33785	2845.6	8.33785
SR11-Spot 124	204.963	65590.7	0.55329	19.3881	2.92349	0.175298	3.29991	0.0246496	1.53056	0.46382	0.957126	156.975	2.37359	164.007	4.99764	266.731	67.108	156.975	2.37359
SR11-Spot 253	735.667	57166.8	1.11809	20.1979	1.9205	0.180811	2.37928	0.0264868	1.40451	0.590311	0.998605	168.523	2.33626	168.758	3.69932	172.038	44.8204	168.523	2.33626
SR11-Spot 211	417.394	56315.4	0.808391	19.7612	2.40611	0.187782	2.85215	0.0269131	1.53146	0.536951	0.97977	171.2	2.58735	174.735	4.57848	222.858	55.6724	171.2	2.58735
SR11-Spot 157	580.601	48891.5	0.689814	19.734	1.81908	0.191657	2.31392	0.0274308	1.43009	0.61804	0.979815	174.449	2.46132	178.042	3.7788	226.028	42.0466	174.449	2.46132
SR11-Spot 301	1085.07	126183	0.91288	20.3662	1.12687	0.185785	1.59138	0.0274422	1.12369	0.706106	1.00863	174.52	1.93475	173.026	2.53168	152.678	26.3755	174.52	1.93475
SR11-Spot 15	442.236	25109.7	0.539517	20.4455	2.23792	0.186333	2.52565	0.0276304	1.17074	0.463539	1.01271	175.701	2.02921	173.496	4.028	143.557	52.5297	175.701	2.02921
SR11-Spot 299	271.455	32628.8	0.770734	19.8411	2.46712	0.192408	2.82625	0.0276877	1.37876	0.487842	0.98533	176.06	2.39461	178.682	4.63065	213.524	57.1574	176.06	2.39461
SR11-Spot 177	186.816	13082.9	0.687017	20.5809	2.88796	0.185588	3.14758	0.0277021	1.25178	0.397696	1.01905	176.15	2.17516	172.857	5.00294	128.053	67.9945	176.15	2.17516
SR11-Spot 136	148.917	24147.2	0.816735	20.2107	2.93163	0.18901	3.22845	0.0277053	1.3522	0.418839	1.0022	176.171	2.34993	175.784	5.21107	170.562	68.4546	176.171	2.34993
SR11-Spot 95	339.041	27245.4	0.490671	19.3142	2.71291	0.19797	2.99549	0.0277317	1.27007	0.423994	0.961445	176.336	2.20924	183.407	5.02638	275.475	62.1326	176.336	2.20924
SR11-Spot 114	1059.11	111759	0.545466	19.9498	1.26075	0.191687	1.82322	0.0277352	1.31706	0.722381	0.990397	176.358	2.29126	178.068	2.97784	200.849	29.2741	176.358	2.29126
SR11-Spot 79	512.374	43290	0.868678	20.246	1.77706	0.188995	2.31982	0.0277516	1.49117	0.642799	1.00392	176.461	2.59565	175.771	3.74417	166.484	41.5472	176.461	2.59565
SR11-Spot 121	770.918	63949.8	0.584729	20.1468	1.473	0.190028	1.87818	0.0277665	1.16527	0.620424	0.999443	176.555	2.02942	176.653	3.0453	177.948	34.3297	176.555	2.02942
SR11-Spot 156	471.958	39064.4	0.479208	19.9688	1.79454	0.191761	2.30532	0.0277723	1.4471	0.627724	0.991355	176.591	2.52076	178.131	3.76646	198.637	41.6811	176.591	2.52076
SR11-Spot 107	842.606	89380	0.675079	20.0568	1.37705	0.19093	1.9608	0.0277738	1.39588	0.71189	0.995365	176.6	2.43166	177.422	3.19192	188.371	32.0446	176.6	2.43166
SR11-Spot 111	152.273	40400.9	0.53623	19.5402	3.14618	0.196575	3.49814	0.0278584	1.52922	0.437153	0.972047	177.131	2.67185	182.224	5.83527	248.813	72.4548	177.131	2.67185
SR11-Spot 40	753.48	74983.1	0.584235	20.2646	1.61983	0.189671	2.01633	0.0278765	1.20072	0.595499	1.00508	177.244	2.09922	176.348	3.26412	164.333	37.8512	177.244	2.09922
SR11-Spot 91	881.44	129690	0.612423	19.8558	1.35073	0.193849	1.77928	0.0279158	1.15817	0.65092	0.986563	177.491	2.0276	179.908	2.93352	211.763	31.3234	177.491	2.0276
SR11-Spot 75	296.179	53617.9	0.317302	19.5645	1.79148	0.196765	2.18256	0.02792	1.24666	0.571192	0.973307	177.517	2.18285	182.385	3.64366	245.91	41.2595	177.517	2.18285
SR11-Spot 231	890.039	78363.5	0.924522	20.3175	1.47186	0.189524	1.99752	0.0279276	1.35046	0.676065	1.00761	177.565	2.36521	176.223	3.23158	158.249	34.4672	177.565	2.36521
SR11-Spot 304	293.025	34986.5	0.997929	19.8675	1.84967	0.193878	2.28349	0.0279364	1.33906	0.586406	0.987145	177.62	2.34596	179.933	3.76531	210.429	42.8874	177.62	2.34596
SR11-Spot 110	143.171	27851.2	0.614521	19.9799	3.17902	0.192947	3.53348	0.0279595	1.5425	0.436538	0.992322	177.765	2.70456	179.14	5.80302	197.324	73.8773	177.765	2.70456
SR11-Spot 3	135.967	36154	0.569219	20.3791	3.69411	0.189373	3.90555	0.0279899	1.26765	0.324576	1.01057	177.955	2.225	176.094	6.31419	151.195	86.5945	177.955	2.225
SR11-Spot 64	375.559	41421.4	0.432113	20.1968	2.35469	0.191797	2.67551	0.0280945	1.27035	0.474806	1.00253	178.611	2.23784	178.161	4.37197	172.169	54.9497	178.611	2.23784
SR11-Spot 128	259.961	25067.8	0.432056	20.7019	1.96178	0.187178	2.41451	0.0281037	1.40759	0.582969	1.02555	178.669	2.48039	174.219	3.86546	114.221	46.276	178.669	2.48039
SR11-Spot 4	240.823	28189.7	0.664965	19.7844	2.10675	0.195997	2.52197	0.0281236	1.38634	0.549706	0.983827	178.794	2.44464	181.733	4.19654	220.099	48.7499	178.794	2.44464
SR11-Spot 241	197.773	105194	0.382214	19.5721	2.86422	0.198373	3.26231	0.0281591	1.56171	0.478712	0.974246	179.017	2.75726	183.749	5.48342	245.013	65.9888	179.017	2.75726
SR11-Spot 161	1108.51	89070	0.880462	20.0763	1.24476	0.193437	1.9399	0.0281658	1.48788	0.766988	0.997219	179.059	2.62752	179.558	3.19266	186.114	28.9723	179.059	2.62752
SR11-Spot 179	58.2604	5503.53	0.636113	19.8238	5.24812	0.196126	5.48953	0.0281983	1.61004	0.293292	0.985805	179.262	2.84642	181.843	9.13978	215.531	121.597	179.262	2.84642
SR11-Spot 287	343.982	72452.9	0.516015	19.8061	2.09542	0.196345	2.38972	0.0282045	1.1489	0.480769	0.985013	179.301	2.03161	182.029	3.98238	217.582	48.5235	179.301	2.03161
SR11-Spot 153	324.431	39141.3	0.689175	20.1209	2.18898	0.193288	2.6624	0.0282065	1.5155	0.569224	0.99935	179.314	2.68006	179.43	4.3789	180.943	50.9952	179.314	2.68006
SR11-Spot 32	138.418	15180.8	0.583211	20.1677	3.8414	0.192907	4.18754	0.0282165	1.66706	0.398101	1.0015	179.376	2.94909	179.107	6.87602	175.533	89.6348	179.376	2.94909
SR11-Spot 309	166.868	26228.5	0.475557	19.8542	2.90647	0.195971	3.08146	0.028219	1.02363	0.332191	0.98724	179.392	1.811	181.711	5.12696	211.949	67.3825	179.392	1.811
SR11-Spot 204	264.415	37379.5	0.387729	20.3745	2.08496	0.191149	2.53829	0.0282461	1.44772	0.570351	1.01099	179.562	2.56367	177.609	4.136	151.696	48.8704	179.562	2.56367
SR11-Spot 30	776.836	45831.1	0.443041	20.1375	1.5751	0.193429	2.10374	0.0282505	1.39456	0.662894	1.00022	179.59	2.46992	179.551	3.46218	179.016	36.7262	179.59	2.46992
SR11-Spot 120	579.816	41149.8	0.980537	20.1775	1.68402	0.19306	2.10767	0.0282525	1.26742	0.601335	1.00204	179.602	2.24489	179.237	3.46309	174.398	39.299	179.602	2.24489
SR11-Spot 171	334.89	105305	0.732593	20.1775	1.7391	0.193067	1.98016	0.0282537	0.94687	0.478179	1.00204	179.61	1.6772	179.243	3.25368	174.391	40.5831	179.61	1.6772
SR11-Spot 282	120.628	22941.1	0.539825	20.0628	3.19871	0.194317	3.60163	0.0282749	1.65529	0.459594	0.996873	179.743	2.93416	180.306	5.95011	187.68	74.4728	179.743	2.93416
SR11-Spot 105	485.145	31504	0.400944	19.8812	1.88647	0.196128	2.51205	0.0282801	1.65881	0.66034	0.98862	179.775	2.94093	181.845	4.18238	208.832	43.7643	179.775	2.94093
SR11-Spot 94	649.623	64128.7	0.93356	20.2763	1.44052	0.192344	1.79959	0.0282856	1.07863	0.599374	1.00662	179.81	1.91268	178.627	2.94769	162.986	33.6702	179.81	1.91268
SR11-Spot 174	421.505	34969.1	0.486076	20.3243	1.78237	0.192105	2.3436	0.0283174	1.52171	0.649305	1.00888	180.009	2.70132	178.424	3.83477	157.478	41.7152	180.009	2.70132
SR11-Spot 261	145.87	30479.7	0.585487	19.7622	2.5775	0.197574	2.96334	0.0283182	1.46215	0.493412	0.983296	180.014	2.59566	183.072	4.96413	222.714	59.6394	180.014	2.59566
SR11-Spot 222	702.386	54664.7	0.685746	20.1703	1.60283	0.193696	2.11081	0.0283356	1.37348	0.650689	1.00192	180.123	2.43971	179.778	3.47783	175.221	37.3902	180.123	2.43971
SR11-Spot 180	561.286	56093.9	0.610298	19.9146	1.57789	0.19626	2.24236	0.0283467	1.59324	0.71052	0.990305	180.192	2.83114	181.956	3.73544	204.948	36.6193	180.192	2.83114
SR11-Spot 20	340.608	579499	0.530151	20.0287	1.42309	0.19522	1.87001	0.028358	1.21316	0.648744	0.995525	180.263	2.15659	181.074	3.10137	191.684	33.1192	180.263	2.15659
SR11-Spot 294	380.576	29379.4	0.672309	20.2738	2.08731	0.192901	2.55606	0.0283641	1.47533	0.577188	1.0067	180.302	2.62319	179.102	4.19696	163.273	48.8052	180.302	2.62319
SR11-Spot 284	99.3187	38089.7	0.651752	16.4598	3.23421	0.237602	3.61177	0.0283643	1.60772	0.445133	0.832981	180.303	2.8586	216.455	7.04085	630.565	69.6718	180.303	2.8586
SR11-Spot 233	220.007	46555.6	0.504528	20.4315	2.13281	0.191427	2.41778	0.0283662	1.13875	0.470991	1.01388	180.315	2.02489	177.846	3.94443	145.133	50.0394	180.315	2.02489
SR11-Spot 206	240.527	27049.2	0.38984	19.9963	2.28002	0.195604	2.86592	0.0283678	1.73639	0.605874	0.994073	180.325	3.08776	181.4	4.7609	195.45	52.9805	180.325	3.08776
SR11-Spot 125	392.243	62101.9	1.24779	20.1389	1.95709	0.194225	2.61571	0.0283687	1.73544	0.663468	1.00057	180.33	3.08616	180.228	4.31958	178.865	45.6457	180.33	3.08616
SR11-Spot 131	248.913	40372.4	0.557201	19.7895	2.26749	0.197664	2.72716	0.0283701	1.51522	0.555602	0.984664	180.339	2.69466	183.148	4.57021	219.515	52.4755	180.339	2.69466
SR11-Spot 186	559.33	41902.6	0.675761	20.2033	1.69343	0.193616	2.27424	0.0283702	1.51804	0.667494	1.00351	180.34	2.6997	179.71	3.7458	171.411	39.5257	180.34	2.6997
SR11-Spot 76	307.543	40065	1.09246	20.3583	2.60725	0.192258	2.92343	0.0283873	1.32239	0.452341	1.0106	180.447	2.35313	178.554	4.78674	153.584	61.0568	180.447	2.35313
SR11-Spot 17	145.165	50999.5	0.735341	20.9183	3.18664	0.187193	3.4549	0.0283997	1.33478	0.386344	1.03612	180.525	2.37618	174.231	5.53142	89.6555	75.5197	180.525	2.37618
SR11-Spot 118	848.592	67124.6	0.66489	19.8044	1.41549	0.197788	1.69112	0.0284093	0.925349	0.547182	0.985439	180.585	1.64785	183.253	2.83547	217.771	32.766	180.585	1.64785
SR11-Spot 52	546.271	246121	0.690806	20.3331	1.68058	0.192656	2.03007	0.0284109	1.13877	0.560953	1.00951	180.595	2.02802	178.893	3.32973	156.474	39.365	180.595	2.02802
SR11-Spot 189	330.678	60097.9	0.589757	20.0489	2.21649	0.195488	2.84398	0.0284256	1.78196	0.626574	0.996612	180.687	3.17507	181.301	4.72209	189.291	51.5757	180.687	3.17507
SR11-Spot 31	586.974	31896.6	0.88792	19.9706	1.37347	0.196262	1.98866	0.0284268	1.43818	0.72319	0.993053	180.695	2.56263	181.959	3.31286	198.43	31.9062	180.695	2.56263
SR11-Spot 103	178.01	20599.2	0.332641	20.2675	3.35351	0.193448	3.57748	0.0284356	1.24591	0.348265	1.00659	180.75	2.2207	179.567	5.88806	164.004	78.4107	180.75	2.2207
SR11-Spot 100	380.093	61342.1	0.587199	20.2698	2.23762	0.193446	2.49682	0.0284385	1.10778	0.443677	1.0067	180.768	1.9747	179.565	4.10938	163.74	52.3071	180.768	1.9747
SR11-Spot 122	348.864	47122.3	0.444621	20.176	2.41976	0.194445	2.86434	0.0284532	1.5327	0.535099	1.00247	180.86	2.73352	180.415	4.73466	174.57	56.4532	180.86	2.73352
SR11-Spot 104	231.002	42810.1	0.397138	20.5029	3.57602	0.191346	3.98028	0.0284534	1.74777	0.439107	1.01735	180.861	3.11711	177.777	6.49129	136.98	84.0575	180.861	3.11711
SR11-Spot 38	387.821	46510	0.586541	19.9446	1.89793	0.196756	2.61188	0.0284612	1.79437	0.687003	0.991954	180.91	3.20107	182.378	4.36021	201.443	44.0696	180.91	3.20107
SR11-Spot 268	116.017	44874.9	0.572914	19.6033	3.07106	0.200482	3.32928	0.0285038	1.28556	0.386139	0.976519	181.178	2.29673	185.534	5.64552	241.345	70.8052	181.178	2.29673
SR11-Spot 23	336.99	49683.1	0.42952	20.1056	1.73332	0.195484	2.08515	0.0285053	1.15908	0.555874	0.999388	181.187	2.07087	181.298	3.46208	182.722	40.3639	181.187	2.07087
SR11-Spot 218	119.624	16000.2	0.549938	21.0006	3.79232	0.187187	4.09341	0.0285107	1.54086	0.376425	1.04014	181.22	2.75347	174.227	6.55357	80.2902	90.0416	181.22	2.75347
SR11-Spot 272	449	50535.9	0.718726	20.0445	2.02033	0.196224	2.34634	0.0285263	1.19314	0.508512	0.99666	181.318	2.13324	181.926	3.90807	189.804	47.0221	181.318	2.13324
SR11-Spot 22	214.08	74536.4	0.415717	20.1318	2.92879	0.195384	3.15044	0.0285278	1.16081	0.36846	1.00064	181.328	2.07555	181.213	5.22861	179.686	68.284	181.328	2.07555
SR11-Spot 256	317.774	60150.5	0.449788	20.0873	1.89774	0.195817	2.56902	0.028528	1.73161	0.674033	0.998612	181.329	3.09615	181.581	4.27157	184.841	44.1736	181.329	3.09615
SR11-Spot 1	370.334	68793.2	0.745021	20.0919	2.08443	0.195773	2.50487	0.0285281	1.38907	0.554547	0.998822	181.33	2.48369	181.543	4.1641	184.305	48.5532	181.33	2.48369
SR11-Spot 49	381.132	60551.2	0.561378	20.3702	1.72919	0.193187	2.09317	0.0285412	1.17952	0.563511	1.01152	181.412	2.10997	179.345	3.44116	152.182	40.5218	181.412	2.10997
SR11-Spot 295	310.935	133491	0.462006	20.0392	2.21126	0.196418	2.59884	0.0285469	1.36539	0.525386	0.996468	181.448	2.44293	182.091	4.33222	190.468	51.4458	181.448	2.44293
SR11-Spot 308	251.937	87069.9	0.484674	19.9945	3.15158	0.196878	3.42173	0.02855	1.33258	0.389448	0.994441	181.467	2.38448	182.481	5.71515	195.66	73.2616	181.467	2.38448
SR11-Spot 292	498.82	138464	0.455753	20.228	1.54069	0.194612	1.93036	0.0285509	1.16298	0.602472	1.00507	181.473	2.08107	180.556	3.19309	168.559	36.0106	181.473	2.08107
SR11-Spot 184	392.075	148525	0.690966	19.8314	1.94756	0.198633	2.51177	0.0285696	1.5862	0.631506	0.987067	181.589	2.84018	183.969	4.22647	214.656	45.11	181.589	2.84018
SR11-Spot 230	120.698	9163.02	0.668437	16.3282	4.53011	0.24126	4.88535	0.0285708	1.82885	0.374354	0.827506	181.597	3.2748	219.451	9.64185	647.821	97.3486	181.597	3.2748
SR11-Spot 46	510.008	55265.2	0.706294	20.2365	1.0845	0.194836	1.57879	0.0285959	1.14736	0.726734	1.00557	181.755	2.05625	180.747	2.61406	167.572	25.3576	181.755	2.05625
SR11-Spot 41	525.824	36204.2	0.431037	19.8074	1.53239	0.199394	2.14315	0.0286443	1.49829	0.699107	0.986159	182.058	2.6896	184.613	3.61772	217.433	35.4896	182.058	2.6896
SR11-Spot 99	408.367	138297	1.09776	20.1362	1.91767	0.196273	2.25527	0.028664	1.18693	0.526291	1.00117	182.182	2.1321	181.968	3.75718	179.174	44.7059	182.182	2.1321
SR11-Spot 202	178.892	18758.6	0.330008	20.1585	3.22078	0.19608	3.57453	0.0286675	1.55042	0.433742	1.0022	182.203	2.78537	181.803	5.95012	176.587	75.1488	182.203	2.78537
SR11-Spot 220	137.523	16631.4	0.423512	20.1366	2.97526	0.19634	3.35603	0.0286744	1.55268	0.462652	1.00122	182.246	2.79007	182.025	5.59261	179.122	69.3881	182.246	2.79007
SR11-Spot 236	229.596	47381.3	0.452402	19.6868	3.22691	0.200867	3.45588	0.0286803	1.237	0.35794	0.980757	182.283	2.22326	185.86	5.86959	231.535	74.5131	182.283	2.22326
SR11-Spot 298	373.179	301949	0.398425	19.0972	2.92724	0.207144	3.31998	0.0286907	1.56637	0.471803	0.95394	182.349	2.81624	191.153	5.78473	301.344	66.7342	182.349	2.81624
SR11-Spot 262	329.939	25951	0.411547	19.8715	2.63951	0.19918	2.96823	0.0287061	1.35771	0.457416	0.989226	182.445	2.44236	184.432	5.00601	209.937	61.1857	182.445	2.44236
SR11-Spot 240	325.685	271071	0.662181	20.0831	2.4455	0.197125	2.74814	0.0287125	1.25372	0.456206	0.998878	182.485	2.25577	182.69	4.59487	185.32	56.9279	182.485	2.25577
SR11-Spot 276	135.362	180129	0.53278	20.0652	3.1332	0.197383	3.42921	0.0287244	1.39375	0.406434	0.998091	182.56	2.50874	182.909	5.7399	187.398	72.9435	182.56	2.50874
SR11-Spot 169	337.358	103628	0.697828	20.6051	1.67764	0.192301	2.15174	0.028738	1.34741	0.626195	1.0227	182.645	2.42644	178.591	3.52385	125.242	39.4781	182.645	2.42644
SR11-Spot 71	164.417	42708.9	0.497359	20.161	3.03155	0.197085	3.32193	0.028818	1.35829	0.408887	1.00268	183.146	2.45266	182.656	5.55332	176.301	70.7248	183.146	2.45266
SR11-Spot 45	382.287	53929.4	0.515018	20.3324	1.89481	0.195436	2.33214	0.0288198	1.35961	0.582989	1.01049	183.158	2.45519	181.257	3.87136	156.549	44.3467	183.158	2.45519
SR11-Spot 2	224.481	158206	0.450141	20.1983	2.3622	0.196863	2.77138	0.0288388	1.44933	0.522964	1.00443	183.277	2.61888	182.469	4.62859	171.993	55.1371	183.277	2.61888
SR11-Spot 26	184.719	45735.1	0.798396	19.8867	2.64659	0.200037	2.94721	0.0288517	1.29677	0.44	0.99028	183.358	2.34423	185.157	4.98838	208.159	61.3775	183.358	2.34423
SR11-Spot 270	254.123	29482.1	0.477613	20.4967	2.52079	0.194178	2.8457	0.0288658	1.32047	0.464023	1.01808	183.446	2.38821	180.188	4.69844	137.658	59.2347	183.446	2.38821
SR11-Spot 112	310.468	73460.6	0.550708	19.7305	2.04983	0.20177	2.58492	0.0288731	1.57481	0.60923	0.98322	183.491	2.84891	186.623	4.40672	226.461	47.3779	183.491	2.84891
SR11-Spot 255	452.626	42100	0.792252	19.1517	2.1853	0.207927	2.54858	0.0288813	1.31139	0.514556	0.95689	183.543	2.37301	191.812	4.45453	294.806	49.9076	183.543	2.37301
SR11-Spot 87	325.707	64945.2	0.417398	20.5257	2.10127	0.194446	2.34397	0.0289464	1.03867	0.443126	1.01959	183.951	1.88364	180.415	3.8745	134.342	49.3714	183.951	1.88364
SR11-Spot 96	334.779	36104.7	0.575514	20.0976	2.35643	0.198767	2.66984	0.0289725	1.2551	0.470103	1.00018	184.115	2.27813	184.082	4.49496	183.641	54.8703	184.115	2.27813
SR11-Spot 224	233.585	27569.9	0.414614	19.9464	2.12991	0.200293	2.55742	0.0289753	1.41558	0.55352	0.9933	184.132	2.56966	185.374	4.33324	201.22	49.4558	184.132	2.56966
SR11-Spot 205	156.325	61592.7	0.61246	19.4254	2.97364	0.206135	3.24659	0.0290415	1.30301	0.401347	0.969746	184.546	2.37056	190.304	5.63401	262.363	68.2823	184.546	2.37056
SR11-Spot 62	242.592	65779	0.483535	20.3971	1.94875	0.196335	2.28763	0.0290445	1.19818	0.523763	1.01398	184.565	2.18006	182.02	3.81209	149.099	45.6981	184.565	2.18006
SR11-Spot 247	301.536	110148	0.464953	19.8612	2.35525	0.20177	2.90944	0.0290644	1.70811	0.587093	0.989643	184.69	3.10994	186.623	4.95995	211.157	54.6002	184.69	3.10994
SR11-Spot 25	361.612	165068	0.562472	19.8658	2.07752	0.20179	2.45954	0.0290739	1.31652	0.535273	0.989874	184.75	2.39775	186.64	4.19331	210.627	48.1694	184.75	2.39775
SR11-Spot 147	76.622	29016.8	0.838441	19.5385	4.77785	0.205418	5.01977	0.0291091	1.53957	0.306701	0.975064	184.97	2.80728	189.701	8.68613	248.997	110.024	184.97	2.80728
SR11-Spot 291	198.783	30597.6	0.620568	20.1464	2.99392	0.199572	3.30554	0.0291606	1.40107	0.423855	1.00286	185.292	2.55912	184.764	5.58405	177.986	69.8014	185.292	2.55912
SR11-Spot 27	411.36	47195.6	0.589467	20.0039	1.87629	0.201001	2.3411	0.0291616	1.4001	0.598054	0.996379	185.299	2.55745	185.973	3.97838	194.557	43.6266	185.299	2.55745
SR11-Spot 148	226.88	28836.1	0.38407	20.3	2.32618	0.198946	2.6983	0.0292907	1.36737	0.506752	1.01017	186.108	2.5084	184.234	4.54632	160.282	54.4277	186.108	2.5084
SR11-Spot 142	394.666	69305.8	0.591879	19.8244	2.69516	0.204294	3.14938	0.0293734	1.62933	0.517348	0.988729	186.625	2.99714	188.753	5.42478	215.444	62.4388	186.625	2.99714
SR11-Spot 115	378.366	46348.4	0.681472	19.9623	2.02248	0.203856	2.51829	0.0295143	1.50045	0.595822	0.995351	187.508	2.77294	188.383	4.32999	199.395	46.9575	187.508	2.77294
SR11-Spot 37	238.64	31236.7	0.455745	20.1296	2.29965	0.202203	2.61773	0.0295203	1.25063	0.477755	1.00298	187.545	2.31171	186.989	4.47061	179.941	53.606	187.545	2.31171
SR11-Spot 307	192.659	815572	0.599555	20.2929	2.89729	0.200755	3.18671	0.0295467	1.32698	0.416411	1.01048	187.711	2.45497	185.765	5.40989	161.093	67.757	187.711	2.45497
SR11-Spot 281	332.586	109693	0.591404	19.888	2.06128	0.204873	2.47703	0.0295512	1.3736	0.554537	0.99206	187.739	2.54159	189.241	4.27668	208.007	47.7921	187.739	2.54159
SR11-Spot 102	228.971	65328.9	0.719088	19.7334	2.19922	0.207732	2.65832	0.0297306	1.49335	0.561766	0.985466	188.862	2.77946	191.647	4.64271	226.079	50.8562	188.862	2.77946
SR11-Spot 132	634.686	168754	0.957921	19.9236	1.79514	0.207884	2.14106	0.0300392	1.16688	0.545001	0.994879	190.793	2.19371	191.775	3.74159	203.857	41.6488	190.793	2.19371
SR11-Spot 250	327.667	27484.2	0.780654	19.9775	2.11544	0.207476	2.56684	0.0300613	1.45381	0.566382	0.997384	190.932	2.73508	191.432	4.47837	197.605	49.1634	190.932	2.73508
SR11-Spot 293	224.296	18653.4	0.79719	19.7722	2.60401	0.209965	3.06263	0.0301093	1.61208	0.526372	0.988162	191.232	3.03754	193.523	5.39637	221.533	60.253	191.232	3.03754
SR11-Spot 33	636.366	114686	0.948686	20.2201	1.56345	0.205938	2.2654	0.0302008	1.63941	0.723673	1.00877	191.805	3.09815	190.138	3.92816	169.471	36.5296	191.805	3.09815
SR11-Spot 163	195.678	23460.8	0.707424	20.4492	3.49752	0.203701	3.72066	0.0302112	1.26912	0.341101	1.01922	191.87	2.39918	188.253	6.39337	143.131	82.1082	191.87	2.39918
SR11-Spot 191	543.398	28133.2	1.27022	15.068	8.57208	0.27818	8.73866	0.0304004	1.69812	0.194323	0.774655	193.054	3.22968	249.213	19.3135	817.959	179.383	193.054	3.22968
SR11-Spot 176	56.6057	28841.7	0.464633	19.4506	5.51063	0.21627	5.89475	0.030509	2.09307	0.355075	0.974512	193.733	3.99466	198.8	10.6433	259.35	126.667	193.733	3.99466
SR11-Spot 199	106.389	44053.7	0.513939	19.8798	3.67141	0.213005	4.0861	0.0307115	1.79359	0.438949	0.994535	195	3.44512	196.071	7.28574	208.999	85.1665	195	3.44512
SR11-Spot 187	271.828	22737.8	1.65338	19.4847	1.80268	0.217415	2.23246	0.0307243	1.31689	0.589884	0.976592	195.08	2.53051	199.756	4.04824	255.337	41.4379	195.08	2.53051
SR11-Spot 7	272.184	97160	0.458492	20.1003	2.21028	0.214908	2.59735	0.0313296	1.36415	0.525209	1.00608	198.864	2.67139	197.663	4.66523	183.329	51.5007	198.864	2.67139
SR11-Spot 200	399.023	186151	1.23668	20.0341	1.76295	0.215767	2.34175	0.0313512	1.54136	0.65821	1.00312	198.999	3.02044	198.381	4.21995	191.05	41.0105	198.999	3.02044
SR11-Spot 21	908.829	80760.9	1.1974	19.8731	1.36799	0.228992	1.92133	0.0330053	1.34912	0.702178	0.999827	209.33	2.77874	209.366	3.635	209.766	31.7141	209.33	2.77874
SR11-Spot 237	158.745	35466.6	0.75584	19.7659	2.00051	0.249584	2.43752	0.0357793	1.39265	0.571339	1.00168	226.618	3.10117	226.238	4.94348	222.312	46.2723	226.618	3.10117
SR11-Spot 305	444.697	29704.6	0.574007	19.9493	1.36131	0.271179	1.8941	0.0392358	1.31698	0.695306	1.0183	248.095	3.20528	243.636	4.10284	200.884	31.609	248.095	3.20528
SR11-Spot 126	689.279	175220	0.36474	19.1085	1.40628	0.283507	1.787	0.0392907	1.1026	0.617013	0.980267	248.435	2.68714	253.436	4.00795	299.952	32.0861	248.435	2.68714
SR11-Spot 88	617.891	174334	0.525294	19.3939	1.55348	0.29328	1.80222	0.0412522	0.913602	0.506932	0.9979	260.59	2.33328	261.138	4.14982	266.069	35.6503	260.59	2.33328
SR11-Spot 297	216.965	28339.3	0.758363	19.067	1.88541	0.337388	2.39259	0.0466564	1.473	0.61565	0.995836	293.961	4.23281	295.19	6.1288	304.937	42.9649	293.961	4.23281
SR11-Spot 70	577.803	91597.4	0.728176	18.3538	1.31347	0.41913	1.90799	0.0557921	1.38391	0.725324	0.984682	349.984	4.71433	355.429	5.72184	391.115	29.4768	349.984	4.71433
SR11-Spot 162	125.691	82583.3	1.33299	18.7069	2.50198	0.430707	2.8241	0.0584361	1.30983	0.463802	1.00668	366.108	4.66174	363.678	8.63281	348.191	56.5723	366.108	4.66174
SR11-Spot 197	100.56	142705	0.747239	18.616	2.26863	0.43413	2.64355	0.0586146	1.35708	0.513355	1.00298	367.195	4.84385	366.105	8.12563	359.187	51.2036	367.195	4.84385
SR11-Spot 302	1216.42	96684.8	0.549083	18.2594	1.21228	0.446817	1.62475	0.0591718	1.08176	0.665799	0.988105	370.587	3.8958	375.048	5.09492	402.674	27.1501	370.587	3.8958
SR11-Spot 269	454.929	243145	1.08028	18.2968	1.462	0.454104	2.20175	0.06026	1.6463	0.74772	0.992259	377.206	6.03174	380.149	6.98177	398.091	32.7695	377.206	6.03174
SR11-Spot 19	611.057	194054	0.164145	18.3418	1.24002	0.460689	2.72147	0.0612842	2.42255	0.890162	0.996604	383.431	9.01795	384.737	8.71554	392.582	27.821	383.431	9.01795
SR11-Spot 271	341.93	92332.2	1.52625	18.2415	1.50748	0.470701	2.03145	0.0622737	1.36173	0.670324	0.994295	389.439	5.1461	391.673	6.60182	404.867	33.7492	389.439	5.1461
SR11-Spot 151	159.146	210085	1.13297	18.3094	1.67146	0.471805	2.01732	0.0626522	1.12951	0.559906	0.998215	391.735	4.29292	392.435	6.56633	396.543	37.4758	391.735	4.29292
SR11-Spot 140	281.441	39979.7	0.00296824	18.4531	1.93906	0.474983	2.3149	0.0635692	1.26444	0.546219	1.00677	397.295	4.87189	394.625	7.56939	378.992	43.5985	397.295	4.87189
SR11-Spot 54	411.478	57341.4	0.577243	18.3013	1.13394	0.479366	1.63845	0.0636279	1.18267	0.721823	1.00003	397.651	4.5608	397.637	5.39088	397.538	25.4196	397.651	4.5608
SR11-Spot 134	249.896	102770	0.857427	17.7996	2.02887	0.495717	2.36221	0.0639944	1.20985	0.512169	0.978163	399.872	4.69087	408.799	7.94954	459.533	44.9996	399.872	4.69087
SR11-Spot 313	151.386	30403.8	0.488909	18.0987	2.1703	0.487645	2.56621	0.0640105	1.36939	0.533622	0.99173	399.969	5.31068	403.305	8.54156	422.432	48.4532	399.969	5.31068
SR11-Spot 259	211.264	45453.7	0.132288	18.1813	1.59542	0.488	2.06878	0.0643493	1.317	0.636606	0.975159	402.022	5.13291	403.547	6.88919	412.263	35.673	402.022	5.13291
SR11-Spot 72	141.18	63969.4	0.580069	18.3105	2.0657	0.485384	2.41556	0.064459	1.25213	0.518359	1.01581	402.686	4.8879	401.76	8.01502	396.418	46.2995	402.686	4.8879
SR11-Spot 59	393.74	74286.2	0.380273	18.3033	1.47909	0.499549	2.15714	0.0663142	1.5702	0.72791	1.04183	413.912	6.295	411.397	7.29681	397.291	33.1577	413.912	6.295
SR11-Spot 192	416.495	96124.3	0.534737	17.9393	1.30446	0.510394	2.00217	0.0664063	1.51891	0.75863	0.937398	414.468	6.09728	418.714	6.86995	442.148	29.029	414.468	6.09728
SR11-Spot 65	132.668	241425	0.475099	17.9515	1.98515	0.510272	2.30422	0.0664357	1.16989	0.507714	0.941029	414.646	4.69817	418.632	7.90514	440.63	44.1832	414.646	4.69817
SR11-Spot 145	341.167	67802.5	0.366614	17.8559	1.74971	0.517177	2.24111	0.066976	1.4004	0.624866	0.923552	417.911	5.66674	423.264	7.75719	452.504	38.8495	417.911	5.66674
SR11-Spot 117	316.487	29180.2	0.687476	17.4658	1.5767	0.534836	2.48097	0.0677496	1.91552	0.772085	0.842869	422.584	7.83505	435.014	8.77849	501.364	34.7357	422.584	7.83505
SR11-Spot 278	429.865	53959.4	0.0368697	18.0429	1.3131	0.53073	2.0787	0.0694511	1.61144	0.775217	1.00821	432.848	6.74607	432.294	7.31819	429.321	29.2835	432.848	6.74607
SR11-Spot 239	275.006	63963.6	0.430715	17.6607	1.68083	0.545559	2.16989	0.0698795	1.37232	0.632435	0.913088	435.43	5.77813	442.083	7.77738	476.876	37.172	435.43	5.77813
SR11-Spot 135	35.8302	23693.3	0.625352	17.5978	4.383	0.550341	4.77107	0.0702407	1.88479	0.395045	0.902686	437.606	7.97421	445.22	17.1986	484.781	96.8157	437.606	7.97421
SR11-Spot 219	137.185	33395.5	0.794623	17.5021	1.52702	0.560872	2.2432	0.0711956	1.64322	0.732531	0.892489	443.355	7.04041	452.094	8.18474	496.762	33.6467	443.355	7.04041
SR11-Spot 207	487.062	61108	0.889214	17.815	1.29425	0.555773	2.05714	0.0718097	1.59898	0.777283	0.976876	447.049	6.90601	448.772	7.46197	457.631	28.7106	447.049	6.90601
SR11-Spot 73	240.878	214626	1.05704	17.9284	1.52683	0.554132	1.97277	0.0720532	1.24924	0.633241	1.0113	448.514	5.41252	447.7	7.14229	443.5	33.9535	448.514	5.41252
SR11-Spot 83	641.769	90707.1	0.191745	17.732	1.31696	0.563368	1.84534	0.0724518	1.29263	0.700484	0.963545	450.91	5.62941	453.716	6.75216	467.97	29.1665	450.91	5.62941
SR11-Spot 5	168.64	128174	0.395384	17.8577	1.96503	0.560249	2.27691	0.0725612	1.1502	0.50516	0.998418	451.568	5.0162	451.689	8.3018	452.283	43.648	451.568	5.0162
SR11-Spot 170	429.648	214073	0.587491	17.8391	1.41905	0.564959	1.85378	0.0730952	1.19281	0.643447	1.00035	454.777	5.2377	454.749	6.7953	454.619	31.5114	454.777	5.2377
SR11-Spot 201	279.34	171461	0.532384	17.6442	1.51419	0.580377	2.4368	0.0742696	1.90924	0.783505	0.964313	461.828	8.50898	464.704	9.08678	478.919	33.4815	461.828	8.50898
SR11-Spot 248	433.769	82451.2	0.292353	17.7976	1.36666	0.584149	1.87452	0.075402	1.28298	0.684434	1.01921	468.619	5.79897	467.124	7.01865	459.789	30.3096	468.619	5.79897
SR11-Spot 181	381.981	172889	0.717245	17.5546	1.74216	0.601323	2.04895	0.0765594	1.07845	0.526342	0.970165	475.553	4.94398	478.073	7.81264	490.178	38.4526	475.553	4.94398
SR11-Spot 154	151.521	41357.5	2.69818	17.2659	1.43637	0.689071	2.0322	0.0862882	1.43759	0.707407	1.01305	533.547	7.36138	532.242	8.41825	526.673	31.4665	533.547	7.36138
SR11-Spot 198	274.611	239929	0.434918	17.1192	1.25636	0.711548	1.71541	0.0883462	1.16799	0.680881	1.00077	545.749	6.11195	545.665	7.24139	545.33	27.4544	545.749	6.11195
SR11-Spot 243	710.787	104206	0.197134	16.9565	1.15744	0.744139	1.63334	0.0915142	1.15244	0.705573	0.997018	564.486	6.22867	564.818	7.07597	566.175	25.2078	564.486	6.22867
SR11-Spot 303	161.665	64019.2	0.672809	16.8044	1.4555	0.751273	1.9197	0.0915629	1.25171	0.652033	0.964174	564.774	6.76849	568.963	8.36212	585.759	31.5772	564.774	6.76849
SR11-Spot 216	154.806	69065.1	0.760452	17.0054	1.52366	0.751816	2.00638	0.0927251	1.30537	0.650612	1.02104	571.634	7.14068	569.277	8.74331	559.856	33.2139	571.634	7.14068
SR11-Spot 67	559.721	1.65482e+06	0.681442	16.4866	0.953014	0.779764	1.81109	0.0932379	1.54007	0.850355	0.9165	574.658	8.46717	585.349	8.05714	627.014	20.5615	574.658	8.46717
SR11-Spot 82	362.194	53926.4	0.99955	16.4704	0.965595	0.811061	1.54002	0.0968852	1.1997	0.779018	0.947551	596.129	6.83105	603.049	7.00298	629.126	20.8228	596.129	6.83105
SR11-Spot 127	453.801	117711	0.518833	16.8455	1.22467	0.795713	1.67751	0.0972162	1.1464	0.683393	1.03038	598.074	6.54787	594.408	7.54784	580.443	26.5933	598.074	6.54787
SR11-Spot 51	61.6491	71916.3	0.828063	16.4995	2.37486	0.812878	2.72145	0.0972738	1.32903	0.488353	0.956966	598.413	7.59511	604.067	12.3911	625.323	51.2152	598.413	7.59511
SR11-Spot 312	132.423	29114.4	0.783805	16.5021	2.01094	0.813106	2.42452	0.0973163	1.35441	0.558629	0.957883	598.662	7.74322	604.195	11.0407	624.984	43.3423	598.662	7.74322
SR11-Spot 8	407.044	50427	0.78007	16.461	1.25537	0.815588	1.7581	0.0973704	1.23084	0.700096	0.950165	598.98	7.04034	605.584	8.01929	630.396	27.0434	598.98	7.04034
SR11-Spot 16	336.312	120464	0.253445	16.6116	1.37833	0.811165	1.83889	0.097728	1.21727	0.661957	0.98423	601.08	6.986	603.107	8.36272	610.711	29.8068	601.08	6.986
SR11-Spot 11	425.698	108270	0.0109505	15.8092	2.20721	0.860083	2.54629	0.0986162	1.26957	0.498596	0.845863	606.294	7.34644	630.168	11.9554	716.776	46.8709	606.294	7.34644
SR11-Spot 208	285.207	57251.2	0.317103	16.7164	1.29211	0.814762	1.74261	0.0987805	1.16925	0.670977	1.01693	607.258	6.77621	605.122	7.9442	597.151	27.9698	607.258	6.77621
SR11-Spot 215	213.2	93573.9	0.599568	16.6837	1.34393	0.821389	2.08121	0.0993895	1.58911	0.763554	1.01578	610.83	9.26109	608.823	9.53024	601.341	29.104	610.83	9.26109
SR11-Spot 214	97.9649	129764	0.560825	16.5136	1.91368	0.833844	2.35962	0.0998677	1.38045	0.585029	0.984194	613.633	8.08021	615.743	10.8946	623.488	41.2834	613.633	8.08021
SR11-Spot 86	92.4252	29918.8	0.309028	16.4847	2.36691	0.842876	2.83828	0.100773	1.5664	0.551881	0.986717	618.935	9.2441	620.732	13.1819	627.267	51.0193	618.935	9.2441
SR11-Spot 172	163.978	35229.8	1.59756	16.4416	1.64904	0.857576	2.05781	0.102262	1.23094	0.598182	0.991642	627.653	7.36184	628.799	9.64658	632.943	35.5096	627.653	7.36184
SR11-Spot 84	188.563	135263	0.659022	15.93	1.24695	0.946585	1.56949	0.109364	0.953101	0.607269	0.954994	669.053	6.057	676.323	7.74966	700.584	26.5351	669.053	6.057
SR11-Spot 13	104.551	44214.1	0.707766	15.4916	1.67493	1.13145	2.09917	0.127125	1.26534	0.602784	1.01543	771.444	9.19998	768.446	11.315	759.719	35.3251	771.444	9.19998
SR11-Spot 306	75.1362	25820.8	0.427426	14.0519	1.45984	1.59577	1.91839	0.162631	1.24463	0.648787	1.00957	971.379	11.2233	968.556	11.9754	962.175	29.8209	962.175	29.8209
SR11-Spot 97	361.73	116178	0.38415	13.8491	0.964711	1.68962	1.5148	0.169711	1.16789	0.770983	1.01892	1010.52	10.9232	1004.62	9.66266	991.755	19.6171	991.755	19.6171
SR11-Spot 144	500.769	279717	0.20499	13.838	1.04448	1.68405	1.5431	0.169016	1.13588	0.736102	1.01337	1006.69	10.5866	1002.52	9.83108	993.402	21.2336	993.402	21.2336
SR11-Spot 183	123.414	39936.5	0.261454	13.8172	1.35936	1.67248	1.97374	0.167602	1.431	0.725023	1.00242	998.887	13.2417	998.128	12.5426	996.479	27.6228	996.479	27.6228
SR11-Spot 78	85.2403	45139.5	0.280358	13.7085	1.23129	1.74855	1.67038	0.173846	1.12875	0.675746	1.02053	1033.27	10.7763	1026.63	10.7904	1012.48	24.9393	1012.48	24.9393
SR11-Spot 252	211.524	49838.6	0.381691	13.6941	1.0121	1.68242	1.50162	0.167096	1.10929	0.738728	0.981755	996.094	10.2382	1001.9	9.56335	1014.61	20.4899	1014.61	20.4899
SR11-Spot 190	86.9749	49009.6	0.484021	13.6796	1.69258	1.73967	2.06658	0.172599	1.18571	0.573754	1.0095	1026.42	11.2508	1023.34	13.3252	1016.75	34.2881	1016.75	34.2881
SR11-Spot 258	30.8851	20578.9	0.812763	13.6595	3.66349	1.66211	3.97693	0.164662	1.54753	0.389126	0.963619	982.633	14.1043	994.182	25.2175	1019.73	74.2115	1019.73	74.2115
SR11-Spot 246	125.236	191712	0.325212	13.6538	1.45624	1.75278	1.95923	0.173572	1.31071	0.668993	1.01096	1031.76	12.4967	1028.19	12.6676	1020.57	29.488	1020.57	29.488
SR11-Spot 167	134.027	35132.5	0.762337	13.6414	1.23506	1.68068	2.08815	0.16628	1.68374	0.806334	0.969846	991.585	15.4751	1001.24	13.294	1022.41	25.016	1022.41	25.016
SR11-Spot 43	162.492	180066	0.982039	13.6326	1.27451	1.71441	1.7318	0.169508	1.1725	0.677043	0.986008	1009.4	10.9552	1013.93	11.1067	1023.72	25.8105	1023.72	25.8105
SR11-Spot 310	47.2505	49947	0.700992	13.6316	1.77166	1.68866	2.0962	0.16695	1.12039	0.534485	0.97208	995.285	10.3329	1004.26	13.3688	1023.87	35.8613	1023.87	35.8613
SR11-Spot 260	85.8488	63415.9	0.373499	13.5956	1.42138	1.73756	1.82395	0.171331	1.14301	0.626668	0.990508	1019.44	10.7777	1022.56	11.7554	1029.21	28.7586	1029.21	28.7586
SR11-Spot 234	359.784	156444	0.493486	13.5919	1.2792	1.73473	1.83776	0.171006	1.31947	0.71798	0.988237	1017.65	12.4214	1021.51	11.8374	1029.76	25.8807	1029.76	25.8807
SR11-Spot 14	67.0284	41952.2	0.389985	13.5915	1.50897	1.72043	1.82222	0.169591	1.02152	0.560589	0.980617	1009.86	9.54846	1016.18	11.7017	1029.82	30.5269	1029.82	30.5269
SR11-Spot 93	137.294	124524	0.176272	13.5905	1.28558	1.68226	1.62382	0.165816	0.992011	0.610911	0.960235	989.019	9.09562	1001.84	10.3413	1029.98	26.0088	1029.98	26.0088
SR11-Spot 158	132.252	67450	0.388995	13.5866	1.28101	1.67238	1.61334	0.164796	0.980759	0.607905	0.95422	983.372	8.94493	998.091	10.252	1030.55	25.9148	1030.55	25.9148
SR11-Spot 24	278.062	133214	0.499164	13.5645	1.12834	1.6628	1.92016	0.163585	1.55366	0.809131	0.9447	976.667	14.0805	994.443	12.1755	1033.84	22.8164	1033.84	22.8164
SR11-Spot 80	22.0838	11739.1	1.23054	13.5641	2.33921	1.81039	2.82467	0.178099	1.58331	0.56053	1.02193	1056.58	15.43	1049.22	18.4779	1033.91	47.2653	1033.91	47.2653
SR11-Spot 12	244.695	116814	0.352921	13.5619	1.09176	1.80339	1.82855	0.177383	1.46685	0.802193	1.01783	1052.66	14.2462	1046.69	11.9444	1034.22	22.0759	1034.22	22.0759
SR11-Spot 285	116.719	71911.5	0.174872	13.5565	1.37965	1.71007	1.88088	0.168137	1.27839	0.679675	0.967931	1001.84	11.8618	1012.31	12.0516	1035.03	27.889	1035.03	27.889
SR11-Spot 36	521.242	60255.1	0.249078	13.5559	1.0325	1.78804	1.95536	0.175794	1.66053	0.849221	1.00852	1043.95	16.0043	1041.11	12.7338	1035.13	20.8757	1035.13	20.8757
SR11-Spot 226	156.976	103127	0.466776	13.5472	1.16922	1.79942	1.94196	0.1768	1.55053	0.798434	1.0126	1049.47	15.0169	1045.25	12.6753	1036.41	23.6338	1036.41	23.6338
SR11-Spot 314	498.854	872880	0.293774	13.5258	1.08744	1.79656	1.5967	0.17624	1.16915	0.732233	1.00653	1046.4	11.2927	1044.21	10.4156	1039.61	21.9715	1039.61	21.9715
SR11-Spot 249	889.974	155074	0.187506	13.5128	0.888291	1.64217	1.7691	0.160939	1.52991	0.8648	0.923613	961.995	13.6722	986.547	11.1649	1041.56	17.9457	1041.56	17.9457
SR11-Spot 85	362.45	148365	0.832455	13.5119	0.891199	1.76824	1.49053	0.173283	1.19475	0.801564	0.988947	1030.17	11.3749	1033.87	9.66762	1041.69	18.004	1041.69	18.004
SR11-Spot 238	1928.42	116830	0.0613026	13.5112	0.84166	1.68519	1.52742	0.165136	1.27461	0.834484	0.945739	985.259	11.6456	1002.95	9.73366	1041.79	17.0036	1041.79	17.0036
SR11-Spot 267	91.7252	29844.2	0.587591	13.4998	1.45934	1.80182	1.887	0.176416	1.19628	0.63396	1.00371	1047.36	11.5645	1046.12	12.3223	1043.49	29.4626	1043.49	29.4626
SR11-Spot 300	57.5408	43109.7	0.836193	13.4946	1.51539	1.81353	2.27838	0.177494	1.70136	0.746739	1.00862	1053.27	16.5326	1050.35	14.9129	1044.27	30.5902	1044.27	30.5902
SR11-Spot 311	504.109	194337	0.470219	13.4706	0.860522	1.78931	1.53812	0.174813	1.27488	0.828856	0.991102	1038.57	12.2291	1041.58	10.019	1047.9	17.3692	1047.9	17.3692
SR11-Spot 113	482.445	71246.3	0.11593	13.4545	0.957622	1.8222	1.32358	0.177813	0.913693	0.690317	1.00448	1055.01	8.89211	1053.48	8.67761	1050.31	19.3193	1050.31	19.3193
SR11-Spot 275	878.044	80134	0.285068	13.4457	0.797346	1.80797	1.47143	0.176308	1.23667	0.840453	0.995377	1046.77	11.9488	1048.34	9.62015	1051.64	16.0864	1051.64	16.0864
SR11-Spot 265	285.369	177823	0.376022	13.4339	0.900221	1.7886	1.53093	0.174266	1.23829	0.808845	0.983082	1035.58	11.8464	1041.31	9.97072	1053.4	18.1545	1053.4	18.1545
SR11-Spot 289	611.572	62397	0.163599	13.4089	0.911182	1.77491	1.58342	0.172611	1.29498	0.817836	0.970992	1026.48	12.2884	1036.32	10.2842	1057.15	18.3642	1057.15	18.3642
SR11-Spot 178	834.736	1.97837e+07	0.174893	13.3988	0.818466	1.8309	1.42298	0.177922	1.16404	0.81803	0.997112	1055.61	11.3345	1056.6	9.34507	1058.67	16.4948	1058.67	16.4948
SR11-Spot 152	150.485	85204.8	0.489927	13.3202	1.24957	1.84356	1.74778	0.1781	1.22201	0.699179	0.986998	1056.59	11.909	1061.13	11.5061	1070.51	25.108	1070.51	25.108
SR11-Spot 288	125.203	151664	1.08753	13.3091	1.77721	1.83796	2.19845	0.177412	1.2941	0.588643	0.981945	1052.82	12.5702	1059.13	14.4579	1072.18	35.7043	1072.18	35.7043
SR11-Spot 203	395.311	58326.5	0.0220359	13.3007	1.11903	1.88279	1.59987	0.181624	1.1434	0.71468	1.00223	1075.84	11.3295	1075.05	10.6101	1073.45	22.4646	1073.45	22.4646
SR11-Spot 188	38.6689	65864.3	1.20918	13.2362	1.71447	1.87462	2.06694	0.179959	1.15449	0.558547	0.984844	1066.75	11.3505	1072.16	13.6873	1083.17	34.3858	1083.17	34.3858
SR11-Spot 227	162.27	183746	0.304411	13.1864	0.891145	1.88289	1.63251	0.180073	1.36782	0.837867	0.9786	1067.37	13.4552	1075.08	10.8268	1090.72	17.8338	1090.72	17.8338
SR11-Spot 66	224.535	1.18392e+06	0.125795	13.177	1.15688	1.76861	1.77866	0.169024	1.35102	0.759571	0.921785	1006.73	12.5922	1034.01	11.5375	1092.15	23.1524	1092.15	23.1524
SR11-Spot 235	201.037	80444.8	0.318559	13.1252	1.17136	1.92282	1.87708	0.183039	1.46675	0.7814	0.984989	1083.55	14.6292	1089.05	12.5393	1100.07	23.4278	1100.07	23.4278
SR11-Spot 273	177.211	89610.1	0.341189	13.1109	1.05886	1.9641	1.91657	0.186764	1.59752	0.833529	1.00142	1103.82	16.2067	1103.29	12.8958	1102.25	21.161	1102.25	21.161
SR11-Spot 244	371.298	224683	0.320439	13.1069	1.09095	1.94208	2.06463	0.184614	1.75286	0.848995	0.990295	1092.13	17.6098	1095.72	13.8392	1102.84	21.8131	1102.84	21.8131
SR11-Spot 193	787.861	173868	0.0798334	13.0934	0.924235	1.84843	1.65533	0.175531	1.37328	0.829612	0.943553	1042.51	13.2189	1062.87	10.9075	1104.88	18.4841	1104.88	18.4841
SR11-Spot 63	222.667	155655	0.344502	13.0692	1.0737	1.92767	1.73561	0.182718	1.36364	0.785681	0.975855	1081.81	13.5806	1090.73	11.6041	1108.57	21.4591	1108.57	21.4591
SR11-Spot 129	137.898	193249	0.289805	13.0639	1.21819	1.94945	1.79006	0.184707	1.31161	0.732719	0.984898	1092.64	13.1824	1098.26	12.014	1109.39	24.3261	1109.39	24.3261
SR11-Spot 39	87.391	205510	0.675082	13.0367	1.33563	2.04627	1.91745	0.193477	1.37575	0.71749	1.02391	1140.18	14.3771	1131.05	13.0789	1113.55	26.6623	1113.55	26.6623
SR11-Spot 74	851.791	100594	0.270852	13.0296	1.65522	1.70567	2.13074	0.161184	1.34175	0.62971	0.864271	963.355	12.0063	1010.66	13.6397	1114.64	33.037	1114.64	33.037
SR11-Spot 81	65.6744	41763.1	0.411393	12.9739	1.68537	2.03972	1.93944	0.191929	0.959672	0.494819	1.00766	1131.82	9.96166	1128.87	13.215	1123.21	33.5895	1123.21	33.5895
SR11-Spot 274	285.431	173047	0.235451	12.9645	1.13989	2.05053	1.64601	0.192807	1.18744	0.721402	1.01059	1136.56	12.3732	1132.47	11.235	1124.65	22.7121	1124.65	22.7121
SR11-Spot 106	44.4236	48395.8	0.442832	12.9613	1.73974	1.85275	2.27777	0.174166	1.47021	0.645462	0.919913	1035.03	14.0583	1064.41	15.0219	1125.13	34.6762	1125.13	34.6762
SR11-Spot 61	205.544	103242	0.154582	12.9255	1.30853	1.7204	2.10021	0.161277	1.64275	0.782184	0.852497	963.871	14.7071	1016.17	13.4869	1130.65	26.0437	1130.65	26.0437
SR11-Spot 175	52.2438	118267	0.356334	12.8874	1.92257	2.05998	2.19784	0.192543	1.065	0.484566	0.998758	1135.13	11.0846	1135.61	15.0246	1136.55	38.2565	1136.55	38.2565
SR11-Spot 194	1322.01	204019	0.255825	12.7998	1.06656	1.87984	1.68222	0.174512	1.3009	0.773321	0.901606	1036.92	12.4603	1074.01	11.1502	1150.09	21.189	1150.09	21.189
SR11-Spot 109	173.383	96808.5	1.22113	12.7766	1.13321	2.08111	1.55626	0.192845	1.06667	0.685403	0.985351	1136.77	11.1166	1142.6	10.6737	1153.67	22.4918	1153.67	22.4918
SR11-Spot 209	278.18	152933	0.316661	12.7697	0.97942	2.1788	1.82887	0.201789	1.54451	0.844515	1.02615	1184.92	16.7178	1174.29	12.7289	1154.73	19.4553	1154.73	19.4553
SR11-Spot 47	591.243	223930	0.232547	12.7637	0.965562	2.0689	1.48637	0.19152	1.13004	0.760267	0.977441	1129.6	11.7091	1138.57	10.1749	1155.68	19.1579	1155.68	19.1579
SR11-Spot 166	143.846	59250.9	1.28715	12.6995	1.12303	2.09891	1.54519	0.193322	1.06132	0.686855	0.97742	1139.34	11.0838	1148.45	10.627	1165.66	22.2561	1165.66	22.2561
SR11-Spot 245	1040.15	269235	0.215447	12.6958	0.897895	2.06319	1.63581	0.189976	1.36735	0.835888	0.961405	1121.24	14.0721	1136.68	11.1878	1166.25	17.8066	1166.25	17.8066
SR11-Spot 212	96.7351	129411	1.36255	12.6687	1.25254	2.09218	1.67215	0.192234	1.1078	0.6625	0.968381	1133.47	11.5146	1146.24	11.4883	1170.47	24.7923	1170.47	24.7923
SR11-Spot 18	89.219	115497	0.537231	12.6176	1.37969	2.24196	2.2678	0.205166	1.79983	0.793644	1.02079	1203.01	19.7518	1194.27	15.9254	1178.51	27.2796	1178.51	27.2796
SR11-Spot 10	680.566	94739.1	0.326962	12.5441	0.887716	2.15076	1.46278	0.195674	1.16262	0.794802	0.968056	1152.04	12.2653	1165.3	10.1391	1190.05	17.5256	1190.05	17.5256
SR11-Spot 264	72.8443	83882.4	0.86414	12.5386	1.05481	2.16631	1.56219	0.197002	1.15232	0.737627	0.973374	1159.19	12.2255	1170.3	10.853	1190.9	20.8408	1190.9	20.8408
SR11-Spot 35	142.873	104974	0.950349	12.5157	1.34138	2.24847	1.98638	0.204099	1.46506	0.737554	1.00233	1197.3	16.0087	1196.31	13.9614	1194.53	26.4834	1194.53	26.4834
SR11-Spot 98	160.129	87239	0.530519	12.3441	1.27142	2.3316	1.61145	0.208744	0.990074	0.614401	1.00036	1222.12	11.0221	1221.97	11.4516	1221.68	25.0046	1221.68	25.0046
SR11-Spot 196	226.005	82677.9	0.295223	12.3276	1.30929	2.30841	1.86138	0.206392	1.32306	0.710794	0.987968	1209.57	14.5916	1214.87	13.1881	1224.3	25.7192	1224.3	25.7192
SR11-Spot 139	278.269	99842.6	0.920917	12.3046	0.913836	2.33654	1.72306	0.208516	1.46076	0.847774	0.994243	1220.91	16.2474	1223.47	12.2526	1227.97	17.9603	1227.97	17.9603
SR11-Spot 228	19.6404	34751.8	0.720254	12.2879	2.42232	2.12957	2.92147	0.189788	1.6332	0.559035	0.910254	1120.23	16.7942	1158.45	20.1881	1230.67	47.5302	1230.67	47.5302
SR11-Spot 68	143.027	239375	0.241962	12.2203	1.08804	2.38821	1.62599	0.211667	1.20832	0.743126	0.996973	1237.69	13.6072	1239.07	11.6378	1241.45	21.3263	1241.45	21.3263
SR11-Spot 149	451.523	73236.2	0.4292	12.2016	1.02913	2.32646	1.75399	0.205879	1.42034	0.809778	0.969765	1206.83	15.6322	1220.4	12.4564	1244.45	20.1704	1244.45	20.1704
SR11-Spot 116	129.972	110041	0.342217	12.0753	1.3786	2.40537	1.65142	0.210659	0.909197	0.550555	0.974318	1232.33	10.1985	1244.2	11.8447	1264.81	26.9079	1264.81	26.9079
SR11-Spot 279	142.336	84035.1	0.273801	12.0564	1.12828	2.45798	1.53055	0.214929	1.0342	0.675706	0.989847	1255.03	11.7942	1259.77	11.0472	1267.9	22.0094	1267.9	22.0094
SR11-Spot 290	59.1574	79038.6	0.499497	11.8444	1.40667	2.54692	1.95145	0.218791	1.35257	0.693111	0.979325	1275.48	15.6523	1285.56	14.2292	1302.41	27.33	1302.41	27.33
SR11-Spot 101	204.934	223159	0.473493	11.8222	1.29847	2.55062	1.91292	0.218697	1.40471	0.734331	0.976208	1274.99	16.25	1286.61	13.9539	1306.06	25.2141	1306.06	25.2141
SR11-Spot 217	325.663	182528	0.378781	11.8195	0.870684	2.60657	1.23502	0.223443	0.875891	0.709212	0.995048	1300.04	10.3122	1302.49	9.06339	1306.51	16.906	1306.51	16.906
SR11-Spot 165	246.43	56043.6	0.464475	11.782	1.14197	2.68862	1.77863	0.229745	1.3636	0.76666	1.01561	1333.16	16.4224	1325.33	13.1645	1312.67	22.1538	1312.67	22.1538
SR11-Spot 119	206.83	142919	0.42871	11.7652	0.962182	2.60419	1.42301	0.222214	1.04841	0.736754	0.983373	1293.56	12.2877	1301.82	10.4404	1315.43	18.6584	1315.43	18.6584
SR11-Spot 283	480.641	162608	0.448957	11.7533	1.0595	2.42893	1.91222	0.20705	1.59187	0.83247	0.920818	1213.08	17.6026	1251.21	13.7547	1317.4	20.5398	1317.4	20.5398
SR11-Spot 185	131.791	104104	0.434988	11.4968	1.27873	2.76971	1.70272	0.230946	1.12433	0.660315	0.984853	1339.45	13.5983	1347.41	12.7035	1360.05	24.6435	1360.05	24.6435
SR11-Spot 69	67.1514	174237	0.454389	11.4932	1.40602	2.78409	1.91479	0.232072	1.29982	0.678831	0.988756	1345.35	15.783	1351.28	14.3055	1360.65	27.0945	1360.65	27.0945
SR11-Spot 223	169.985	55228.6	0.425852	11.4099	1.36053	2.44925	1.92579	0.202682	1.36295	0.707735	0.865465	1189.71	14.8068	1257.2	13.8859	1374.65	26.1664	1374.65	26.1664
SR11-Spot 42	122.963	68994.3	0.414476	11.3968	1.13724	2.82789	1.54203	0.233746	1.0414	0.675348	0.983467	1354.1	12.7191	1362.96	11.5676	1376.87	21.8655	1376.87	21.8655
SR11-Spot 277	114.197	105295	0.245288	11.2985	1.21061	2.99711	1.74158	0.245597	1.25201	0.718893	1.01595	1415.73	15.9137	1406.89	13.2603	1393.5	23.2219	1393.5	23.2219
SR11-Spot 229	121.671	127752	0.394318	11.2955	1.1911	2.90517	1.82026	0.238	1.37645	0.756185	0.987289	1376.29	17.0583	1383.26	13.7506	1394.01	22.8461	1394.01	22.8461
SR11-Spot 160	76.4424	57712	0.213751	11.2036	1.15138	2.93133	1.70448	0.238188	1.25681	0.737358	0.977015	1377.27	15.5856	1390.04	12.9054	1409.67	22.0372	1409.67	22.0372
SR11-Spot 123	796.476	3.19305e+06	0.217317	11.0079	0.80848	3.00562	1.31118	0.239958	1.03225	0.787272	0.96062	1386.48	12.8776	1409.04	9.9901	1443.32	15.4035	1443.32	15.4035
SR11-Spot 146	309.507	283722	0.687256	10.7506	1.08014	3.29154	1.56023	0.256642	1.12588	0.721612	0.989515	1472.64	14.8227	1479.05	12.1513	1488.25	20.4557	1488.25	20.4557
SR11-Spot 89	149.348	105564	0.426294	10.508	1.06843	3.39725	1.76102	0.25891	1.39987	0.794921	0.969264	1484.26	18.5593	1503.76	13.8155	1531.33	20.1169	1531.33	20.1169
SR11-Spot 55	197.67	51424.4	0.619052	10.497	1.0659	3.30012	1.52654	0.251242	1.09279	0.715857	0.942322	1444.88	14.145	1481.08	11.8962	1533.31	20.064	1533.31	20.064
SR11-Spot 296	112.098	159244	0.747823	10.4608	1.07925	3.48921	1.49755	0.264722	1.03821	0.693269	0.983207	1513.95	14.0087	1524.78	11.8192	1539.81	20.2994	1539.81	20.2994
SR11-Spot 173	138.833	140315	0.586214	10.4012	1.27538	3.50221	1.88076	0.264195	1.38227	0.734954	0.974668	1511.27	18.6219	1527.71	14.8563	1550.55	23.953	1550.55	23.953
SR11-Spot 48	95.4677	242700	0.409963	9.97788	1.03353	3.75951	1.88882	0.272062	1.58097	0.837013	0.952754	1551.26	21.7973	1584.14	15.1504	1628.18	19.215	1628.18	19.215
SR11-Spot 182	191.415	101639	0.61552	9.7838	0.999616	4.18542	1.46381	0.296992	1.06936	0.730527	1.00707	1676.38	15.7852	1671.17	11.9975	1664.62	18.4977	1664.62	18.4977
SR11-Spot 195	200.757	83635.8	0.330511	9.72405	0.974356	4.21238	1.51875	0.29708	1.165	0.767079	1.00052	1676.81	17.2009	1676.43	12.4632	1675.94	18.0042	1675.94	18.0042
SR11-Spot 232	237.472	178538	0.386602	9.70921	1.07406	4.18602	2.22707	0.29477	1.95095	0.87602	0.991993	1665.32	28.6325	1671.29	18.2548	1678.76	19.8397	1678.76	19.8397
SR11-Spot 138	485.276	65888.1	0.291795	9.70708	1.28805	4.15331	1.76342	0.292403	1.2044	0.682991	0.984729	1653.53	17.566	1664.86	14.4319	1679.17	23.7918	1679.17	23.7918
SR11-Spot 168	109.219	151414	0.74371	9.4506	0.925059	4.3939	1.72471	0.301168	1.45564	0.843991	0.981846	1697.1	21.7194	1711.19	14.2666	1728.48	16.9801	1728.48	16.9801
SR11-Spot 315	303.957	3.57379e+06	1.06244	9.33958	1.28803	4.52746	1.81224	0.306676	1.27483	0.703457	0.985255	1724.33	19.2879	1736.03	15.0732	1750.14	23.5799	1750.14	23.5799
SR11-Spot 53	325.763	53455.3	0.96135	9.32836	0.69478	4.50392	1.34486	0.304716	1.15149	0.856216	0.978495	1714.65	17.3364	1731.7	11.1749	1752.34	12.7147	1752.34	12.7147
SR11-Spot 251	416.094	131469	0.216579	9.30735	0.92122	4.72691	1.64946	0.319082	1.36824	0.829506	1.01639	1785.24	21.3359	1772.02	13.8247	1756.46	16.8507	1756.46	16.8507
SR11-Spot 6	227.041	48452.7	1.17044	9.18381	2.64847	4.40812	2.97685	0.293613	1.35914	0.456569	0.931883	1659.56	19.8863	1713.87	24.6422	1780.87	48.306	1780.87	48.306
SR11-Spot 164	40.8133	26483.9	1.03591	8.7081	1.70415	5.09521	2.15486	0.321798	1.31882	0.61202	0.958032	1798.51	20.6977	1835.31	18.2923	1877.29	30.7159	1877.29	30.7159
SR11-Spot 50	227.382	89935.4	0.239191	8.34406	1.11618	5.41173	1.78916	0.327501	1.39829	0.781538	0.934669	1826.26	22.238	1886.71	15.3346	1953.91	19.9355	1953.91	19.9355
SR11-Spot 133	353.279	20774	0.421636	8.20072	5.50561	4.71223	5.978	0.280271	2.3291	0.389612	0.802463	1592.73	32.869	1769.42	50.114	1984.8	98.0508	1984.8	98.0508
SR11-Spot 56	45.816	38981.2	0.789217	8.13968	1.40987	6.04486	2.09614	0.356856	1.55115	0.740003	0.984571	1967.25	26.2987	1982.33	18.2647	1998.08	25.0525	1998.08	25.0525
SR11-Spot 221	267.118	89154.4	0.355831	7.80201	1.14305	6.57045	1.6592	0.371792	1.20266	0.724842	0.983014	2037.83	21.0123	2055.39	14.6229	2073.04	20.1365	2073.04	20.1365
SR11-Spot 225	133.893	627033	0.589455	7.65596	0.973514	6.79846	1.62431	0.377493	1.30025	0.800494	0.980201	2064.56	22.9703	2085.52	14.379	2106.26	17.0851	2106.26	17.0851
SR11-Spot 263	193.765	73820.7	0.687332	7.32262	1.03426	7.50897	1.52275	0.398791	1.11762	0.733947	0.990577	2163.47	20.5402	2174.06	13.6454	2184.05	17.9952	2184.05	17.9952
SR11-Spot 29	126.384	64720.3	0.532875	5.465	0.821857	12.6802	1.74677	0.502592	1.54134	0.882399	0.979421	2624.93	33.235	2656.19	16.4413	2680.08	13.5938	2680.08	13.5938
SR11-Spot 159	70.0612	252642	0.908765	5.39961	0.804705	13.1679	1.33131	0.515675	1.06058	0.796646	0.992904	2680.81	23.2613	2691.76	12.5644	2699.97	13.2855	2699.97	13.2855
SR11-Spot 77	172.869	211232	0.691396	5.32792	0.844966	13.0756	1.38139	0.505262	1.09282	0.791105	0.968534	2636.37	23.6469	2685.12	13.0306	2722.02	13.9212	2722.02	13.9212
SR12-Spot 40	967.935	49287.4	1.01869	20.0492	1.10025	0.188667	3.35591	0.0274342	3.17042	0.944728	0.994179	174.47	5.45725	175.491	5.40854	189.255	25.6152	174.47	3.27435
SR12-Spot 17	427.497	94178.4	0.224848	19.5256	1.3032	0.196476	3.88488	0.0278236	3.65977	0.942056	0.9713	176.913	6.38657	182.14	6.47767	250.483	29.9884	176.913	3.83194
SR12-Spot 107	551.431	43404.4	0.880421	15.6176	3.42986	0.254192	5.00861	0.0287922	3.64996	0.728738	0.795669	182.984	6.58496	229.976	10.3077	742.615	72.5728	182.984	3.95098
SR12-Spot 151	230.839	20613.1	0.500837	20.4347	1.60639	0.207043	4.12607	0.0306852	3.80052	0.9211	1.01971	194.835	7.29397	191.068	7.1864	144.757	37.6643	194.835	4.37638
SR12-Spot 22	446.666	86476.3	0.522668	19.9501	1.25622	0.215921	4.13697	0.0312419	3.94162	0.952781	0.999028	198.317	7.69788	198.509	7.4595	200.784	29.1695	198.317	4.61873
SR12-Spot 66	241.754	29989.8	0.380948	19.9863	1.92483	0.216682	4.56827	0.0314091	4.14296	0.906899	1.00109	199.361	8.13306	199.145	8.2611	196.606	44.7231	199.361	4.87984
SR12-Spot 206	301.756	34342.2	0.547819	18.1503	1.59157	0.276023	3.87037	0.0363353	3.52799	0.911536	0.929613	230.077	7.97395	247.498	8.50119	416.076	35.563	230.077	4.78437
SR12-Spot 118	197.309	45219.2	0.896586	19.5517	1.571	0.2585	4.1751	0.0366559	3.86825	0.926506	0.994063	232.071	8.81745	233.457	8.70792	247.413	36.1927	232.071	5.29047
SR12-Spot 47	157.029	43597.4	0.99795	15.2801	1.9504	0.384066	7.49657	0.0425628	7.23841	0.965562	0.814175	268.699	19.0498	330.026	21.1254	788.649	40.9482	268.699	11.4299
SR12-Spot 1	1110.63	68976.4	0.555984	19.2231	1.23163	0.317185	3.90103	0.0442217	3.7015	0.948852	0.997187	278.948	10.1051	279.735	9.53866	286.328	28.1555	278.948	6.06303
SR12-Spot 65	371.584	66220.2	1.04011	18.9444	1.1113	0.367428	3.70996	0.0504837	3.5396	0.954082	0.999197	317.491	10.9657	317.746	10.1223	319.638	25.2573	317.491	6.57941
SR12-Spot 119	162.308	13338.6	0.535776	19.1002	1.46521	0.385721	3.70366	0.0534331	3.40151	0.918418	1.01306	335.564	11.1223	331.239	10.4682	300.986	33.4331	335.564	6.67336
SR12-Spot 98	241.589	87098.2	0.447828	18.7865	1.66611	0.394131	3.90738	0.0537012	3.53436	0.904535	0.999474	337.205	11.6117	337.383	11.2168	338.586	37.7171	337.205	6.96702
SR12-Spot 6	650.251	56814	0.471971	17.7633	1.52444	0.470889	4.53622	0.0606654	4.2724	0.941841	0.969036	379.671	15.7527	391.803	14.7467	464.058	33.7799	379.671	9.4516
SR12-Spot 217	296.118	98854.4	0.108176	18.1424	1.32017	0.481311	4.05737	0.0633313	3.83659	0.945585	0.992182	395.853	14.7304	398.972	13.3869	417.059	29.4933	395.853	8.83823
SR12-Spot 38	119.823	47589.8	0.546877	18.0025	1.32731	0.513161	3.49891	0.0670016	3.23738	0.925254	0.962579	418.066	13.1049	420.572	12.049	434.319	29.5756	418.066	13.1049
SR12-Spot 79	873.108	219872	0.483036	17.8116	1.05881	0.53236	2.70886	0.0687712	2.49336	0.920446	0.936088	428.748	10.3425	433.374	9.55595	458.021	23.4856	428.748	10.3425
SR12-Spot 218	359.644	47326	0.37123	17.9185	1.20556	0.546999	3.54352	0.0710864	3.33215	0.940348	0.995434	442.698	14.2562	443.029	12.7229	444.728	26.8093	442.698	14.2562
SR12-Spot 144	105.673	35461.6	0.494449	17.4572	1.34541	0.621596	3.56901	0.0787012	3.30571	0.926225	0.971959	488.366	15.5476	490.847	13.8922	502.455	29.6347	488.366	15.5476
SR12-Spot 125	503.216	98850.7	0.459014	17.1078	1.49092	0.663432	4.22909	0.0823169	3.95757	0.935797	0.932654	509.937	19.4036	516.711	17.1281	546.759	32.5817	509.937	19.4036
SR12-Spot 211	316.603	61459.8	0.00988463	17.0889	1.38489	0.721894	3.71627	0.0894719	3.44859	0.927969	1.00583	552.413	18.2571	551.784	15.8212	549.211	30.2524	552.413	18.2571
SR12-Spot 3	780.644	295300	0.587291	16.4978	0.992863	0.783938	3.69739	0.0938009	3.56159	0.963271	0.923952	577.977	19.6894	587.728	16.4993	625.549	21.4264	577.977	19.6894
SR12-Spot 84	121	20662.5	0.589049	16.7229	1.41009	0.7781	4.52854	0.0943725	4.3034	0.950286	0.974957	581.345	23.9228	584.399	20.1244	596.278	30.5292	581.345	23.9228
SR12-Spot 109	348.269	90973.8	0.45318	16.9085	1.11844	0.785477	3.26939	0.0963245	3.07214	0.939666	1.03585	592.833	17.4003	588.603	14.6052	572.314	24.3075	592.833	17.4003
SR12-Spot 204	190.081	216639	0.782357	16.7906	1.10417	0.815678	3.61326	0.0993307	3.44042	0.952164	1.03907	610.485	20.0395	605.635	16.4834	587.533	23.9568	610.485	20.0395
SR12-Spot 154	57.2245	10181.3	0.528294	15.4555	1.80522	0.914187	4.39543	0.102475	4.00761	0.911768	0.822482	628.897	24.0135	659.281	21.318	764.633	38.0431	628.897	24.0135
SR12-Spot 127	72.9537	37047.4	0.476592	16.2742	1.40806	0.882732	3.99239	0.10419	3.73585	0.935742	0.975606	638.919	22.7244	642.457	19.0088	654.895	30.23	638.919	22.7244
SR12-Spot 34	111.518	45903.5	0.640088	16.1252	1.39604	0.923956	4.26803	0.108058	4.03326	0.944992	0.980513	661.458	25.3553	664.45	20.8149	674.604	29.8542	661.458	25.3553
SR12-Spot 23	749.781	432172	0.235654	15.8584	1.31279	0.986907	4.1031	0.11351	3.88742	0.947434	0.975909	693.1	25.5459	697.141	20.6967	710.21	27.9111	693.1	25.5459
SR12-Spot 142	95.0905	69281	0.329166	14.1051	1.23244	1.51263	4.1213	0.154743	3.93271	0.95424	0.971809	927.495	33.9734	935.505	25.1975	954.401	25.1868	954.401	25.1868
SR12-Spot 114	282.575	72583.8	0.126923	13.8468	1.37677	1.69444	4.50902	0.170167	4.29368	0.952244	1.0211	1013.03	40.2515	1006.44	28.7996	992.102	27.9756	992.102	27.9756
SR12-Spot 13	179.826	68662.9	0.300027	13.6673	1.06439	1.70011	3.75016	0.168522	3.59594	0.958876	0.985658	1003.96	33.4315	1008.57	23.9804	1018.57	21.5555	1018.57	21.5555
SR12-Spot 116	90.6341	58386.6	0.203878	13.6661	1.33793	1.71183	4.11588	0.169669	3.89236	0.945692	0.991692	1010.29	36.3979	1012.97	26.3869	1018.75	27.0994	1018.75	27.0994
SR12-Spot 207	340.988	92273.9	0.391853	13.6577	1.37906	1.52205	5.25566	0.150767	5.0715	0.96496	0.88752	905.263	42.8332	939.303	32.2165	1019.99	27.931	1019.99	27.931
SR12-Spot 75	176.15	201349	0.496606	13.624	1.08536	1.71354	3.6008	0.169316	3.43332	0.95349	0.983748	1008.34	32.0481	1013.61	23.092	1025	21.9785	1025	21.9785
SR12-Spot 74	35.3476	66166.1	0.946886	13.5281	1.47515	1.82979	4.31681	0.179531	4.05695	0.939801	1.0242	1064.41	39.8064	1056.2	28.35	1039.26	29.8004	1039.26	29.8004
SR12-Spot 36	1088.14	441059	0.0614831	13.5027	1.2391	1.73908	4.06771	0.17031	3.87439	0.952474	0.971968	1013.82	36.3467	1023.12	26.2296	1043.06	25.0201	1043.06	25.0201
SR12-Spot 212	240.695	54176.9	0.243972	13.4969	1.49254	1.72863	3.56219	0.169214	3.23443	0.907989	0.965373	1007.78	30.176	1019.24	22.9181	1043.93	30.1311	1043.93	30.1311
SR12-Spot 70	314.416	549469	0.17864	13.477	1.03478	1.72712	3.53609	0.168815	3.3813	0.956224	0.960487	1005.58	31.4827	1018.68	22.7428	1046.95	20.8859	1046.95	20.8859
SR12-Spot 210	108.868	99198.1	0.294243	13.4532	1.36403	1.70026	4.65098	0.165898	4.44647	0.956027	0.941902	989.469	40.7867	1008.63	29.7446	1050.5	27.5	1050.5	27.5
SR12-Spot 86	779.045	167877	0.160175	13.4007	1.12309	1.71121	3.72635	0.166314	3.55307	0.9535	0.937061	991.772	32.6618	1012.74	23.8855	1058.39	22.6164	1058.39	22.6164
SR12-Spot 106	291.134	190970	0.515158	13.3221	1.21037	1.62787	4.18014	0.157287	4.00108	0.957162	0.879905	941.68	35.055	981.035	26.2987	1070.21	24.3215	1070.21	24.3215
SR12-Spot 67	198.836	71208.3	0.269943	13.3221	1.26427	1.86808	4.13935	0.180496	3.94156	0.952215	0.9995	1069.68	38.8502	1069.85	27.3824	1070.22	25.4253	1070.22	25.4253
SR12-Spot 201	138.506	30824.6	0.149927	13.2665	1.16036	1.89951	3.70093	0.182766	3.51432	0.949577	1.0032	1082.07	35.0074	1080.92	24.6231	1078.62	23.2881	1078.62	23.2881
SR12-Spot 4	287.107	79442.2	0.400445	13.1322	1.11604	1.56936	5.40231	0.149472	5.28577	0.978428	0.817114	898.003	44.3093	958.175	33.517	1098.99	22.3296	1098.99	22.3296
SR12-Spot 203	76.0096	38993.6	0.205705	13.0422	1.23048	2.05359	4.92747	0.194251	4.77136	0.968319	1.02844	1144.36	50.0307	1133.49	33.6601	1112.71	24.5784	1112.71	24.5784
SR12-Spot 213	98.4574	1.46707e+06	0.233056	13.0278	1.19717	1.90347	4.14781	0.179853	3.97129	0.957442	0.956287	1066.17	39.0251	1082.3	27.6175	1114.91	23.9153	1114.91	23.9153
SR12-Spot 134	811.674	128394	0.21165	12.9702	1.13254	1.68932	3.88245	0.158912	3.71359	0.956507	0.846025	950.73	32.8264	1004.51	24.768	1123.76	22.5838	1123.76	22.5838
SR12-Spot 69	195.787	51357.3	0.257891	12.8005	1.02815	2.09734	4.3357	0.194712	4.21203	0.971476	0.99728	1146.85	44.2534	1147.93	29.8191	1149.98	20.4163	1149.98	20.4163
SR12-Spot 10	634.363	90785.9	0.489586	12.7946	1.22722	1.85334	4.32497	0.171982	4.14721	0.958898	0.888895	1023.02	39.232	1064.62	28.5318	1150.89	24.386	1150.89	24.386
SR12-Spot 5	203.361	176679	0.440778	12.7879	1.08876	2.09107	3.6379	0.19394	3.47115	0.954165	0.991986	1142.68	36.348	1145.88	24.9935	1151.91	21.6321	1151.91	21.6321
SR12-Spot 15	594.646	161063	0.177214	12.6808	1.1449	1.94448	3.38223	0.178833	3.18256	0.940965	0.907581	1060.59	31.1238	1096.54	22.6829	1168.59	22.674	1168.59	22.674
SR12-Spot 149	283.563	1.00074e+06	0.623859	12.6424	1.03336	2.17757	3.50801	0.199664	3.35236	0.955629	0.999046	1173.51	35.9678	1173.9	24.4147	1174.64	20.4489	1174.64	20.4489
SR12-Spot 220	125.791	923291	0.520668	12.5534	1.48386	2.11071	3.63886	0.192171	3.32258	0.91308	0.953331	1133.12	34.526	1152.31	25.0757	1188.6	29.3181	1188.6	29.3181
SR12-Spot 147	254.177	62167.5	0.776495	12.5413	1.46035	2.10349	3.75514	0.19133	3.45954	0.921282	0.947999	1128.58	35.8173	1149.95	25.8488	1190.48	28.8393	1190.48	28.8393
SR12-Spot 105	642.755	330536	0.13038	12.459	1.44084	2.15035	3.69701	0.194309	3.40468	0.920929	0.95117	1144.67	35.7087	1165.17	25.6285	1203.44	28.3908	1203.44	28.3908
SR12-Spot 29	48.1807	124527	0.21731	12.2751	1.22586	2.28027	5.022	0.203007	4.87009	0.969751	0.966526	1191.45	52.9795	1206.2	35.4617	1232.72	24.0526	1232.72	24.0526
SR12-Spot 146	356.951	205714	0.125858	12.063	1.21636	2.33804	4.67029	0.204553	4.50911	0.965488	0.947033	1199.74	49.3626	1223.93	33.2269	1266.84	23.7322	1266.84	23.7322
SR12-Spot 108	249.904	77994.9	0.285905	11.8735	1.33732	2.54911	3.86272	0.219515	3.62383	0.938157	0.985864	1279.31	42.0504	1286.18	28.1776	1297.66	25.9808	1297.66	25.9808
SR12-Spot 110	271.349	95602.2	0.462657	11.8095	1.32935	2.56169	3.98607	0.21941	3.75787	0.942751	0.977533	1278.76	43.5886	1289.78	29.1182	1308.15	25.8063	1308.15	25.8063
SR12-Spot 31	49.3796	21258.3	0.573381	11.6758	1.43926	2.60404	5.06853	0.220513	4.85989	0.958836	0.965703	1284.59	56.6042	1301.78	37.2018	1330.21	27.8529	1330.21	27.8529
SR12-Spot 30	119.084	94904.7	0.518989	11.4514	1.25587	2.94398	3.59573	0.244507	3.36928	0.937024	1.031	1410.08	42.6732	1393.3	27.2597	1367.68	24.1765	1367.68	24.1765
SR12-Spot 115	286.263	117157	0.530596	11.2468	1.47885	2.65809	4.50081	0.21682	4.25091	0.944478	0.902132	1265.05	48.8294	1316.89	33.2193	1402.29	28.334	1402.29	28.334
SR12-Spot 120	135.688	87802.6	0.311789	11.1803	1.1409	3.08501	3.85612	0.250154	3.68348	0.955229	1.01812	1439.27	47.5147	1428.97	29.5779	1413.65	21.8247	1413.65	21.8247
SR12-Spot 20	239.784	100974	0.243872	11.08	1.17085	3.0822	3.7529	0.247685	3.56558	0.950087	0.996967	1426.53	45.63	1428.28	28.7792	1430.87	22.3454	1430.87	22.3454
SR12-Spot 2	392.763	105859	0.615312	11.0454	1.10971	2.78086	3.7738	0.222771	3.60696	0.955789	0.90233	1296.5	42.3622	1350.41	28.1909	1436.83	21.1614	1436.83	21.1614
SR12-Spot 122	175.135	52844.9	0.352935	10.957	1.44143	3.16464	4.21854	0.251487	3.96463	0.939813	0.995867	1446.14	51.3593	1448.58	32.5602	1452.14	27.431	1452.14	27.431
SR12-Spot 33	103.32	74718.5	0.555786	10.9048	1.01754	3.28666	3.42527	0.259939	3.27064	0.954856	1.01938	1489.53	43.499	1477.9	26.6723	1461.22	19.34	1461.22	19.34
SR12-Spot 117	227.594	112261	0.473582	10.8632	1.17363	3.13163	3.67331	0.246733	3.48077	0.947586	0.968085	1421.61	44.4074	1440.49	28.278	1468.47	22.2852	1468.47	22.2852
SR12-Spot 28	279.63	351831	0.280112	10.8566	1.01008	2.95877	3.60595	0.232971	3.46159	0.959967	0.918625	1350.05	42.1647	1397.1	27.3719	1469.64	19.1765	1469.64	19.1765
SR12-Spot 8	82.331	116579	0.372527	10.8409	1.02166	3.23952	4.49117	0.25471	4.37342	0.973782	0.993445	1462.72	57.234	1466.67	34.8597	1472.37	19.3893	1472.37	19.3893
SR12-Spot 215	39.1281	35158.7	0.494213	10.8307	1.41593	3.12851	4.46164	0.245749	4.23101	0.948307	0.960887	1416.51	53.8063	1439.73	34.3427	1474.17	26.8659	1474.17	26.8659
SR12-Spot 100	166.892	130424	0.30998	10.6717	1.20383	3.45654	3.35353	0.267531	3.13001	0.933347	1.01736	1528.26	42.5878	1517.36	26.4164	1502.18	22.7545	1502.18	22.7545
SR12-Spot 85	86.528	82435.1	0.318357	10.5917	1.52996	3.58361	3.98289	0.275287	3.67732	0.923278	1.03377	1567.58	51.1725	1545.91	31.6287	1516.38	28.8652	1516.38	28.8652
SR12-Spot 216	248.052	379274	0.222703	10.5029	1.02134	3.47364	3.42805	0.264603	3.27237	0.954586	0.987666	1513.35	44.1395	1521.25	27.0336	1532.25	19.2277	1532.25	19.2277
SR12-Spot 83	339.261	66253.4	0.318553	10.1492	1.11413	3.12701	3.73028	0.230175	3.56001	0.954356	0.83648	1335.42	42.9406	1439.36	28.7065	1596.47	20.8005	1596.47	20.8005
SR12-Spot 24	249.099	108983	0.489751	10.0236	1.0876	3.62327	4.32212	0.263404	4.18304	0.967822	0.930573	1507.23	56.2214	1554.65	34.4068	1619.68	20.2426	1619.68	20.2426
SR12-Spot 77	90.2643	92367.5	0.703137	9.92757	1.0476	3.28982	4.11148	0.236872	3.97578	0.966994	0.836856	1370.41	49.0837	1478.65	32.0262	1637.58	19.4531	1637.58	19.4531
SR12-Spot 12	87.5305	34315.5	0.430136	9.79393	1.03379	4.22584	4.53587	0.300171	4.41649	0.973681	1.01771	1692.16	65.7324	1679.05	37.26	1662.7	19.1349	1662.7	19.1349
SR12-Spot 48	31.6154	52094.5	0.828698	9.7935	2.36218	3.6752	5.83448	0.261047	5.33491	0.914376	0.899211	1495.19	71.195	1566	46.6034	1662.78	43.726	1662.78	43.726
SR12-Spot 145	101.634	53956.6	0.543732	9.75194	1.09209	3.96166	3.33705	0.280199	3.15329	0.944934	0.953141	1592.37	44.4916	1626.38	27.0611	1670.65	20.1936	1670.65	20.1936
SR12-Spot 103	84.9946	52783.3	0.710513	9.73936	1.42754	4.37274	4.42116	0.308875	4.18435	0.946437	1.03714	1735.17	63.6569	1707.2	36.5521	1673.04	26.3894	1673.04	26.3894
SR12-Spot 219	135.948	753920	0.392439	9.67259	1.34773	3.99234	3.95118	0.280071	3.71422	0.940028	0.944225	1591.72	52.3877	1632.64	32.094	1685.74	24.872	1685.74	24.872
SR12-Spot 95	171.979	225625	0.458653	9.49033	1.08222	4.21433	4.11717	0.290074	3.97239	0.964835	0.954165	1641.9	57.5805	1676.82	33.8002	1720.77	19.8846	1720.77	19.8846
SR12-Spot 138	251.838	2.60435e+06	0.285947	9.45851	1.38148	4.44319	4.14419	0.304801	3.90715	0.942802	0.993129	1715.07	58.8387	1720.43	34.3619	1726.94	25.3627	1726.94	25.3627
SR12-Spot 101	281.252	56273	0.616743	9.42735	1.13675	3.52426	2.87304	0.240966	2.63858	0.918396	0.80307	1391.72	33.0285	1532.67	22.7281	1733	20.8548	1733	20.8548
SR12-Spot 21	122.626	242260	0.39324	9.28427	1.31716	4.58387	4.89736	0.308659	4.71691	0.963153	0.984725	1734.1	71.721	1746.34	40.8435	1761	24.079	1761	24.079
SR12-Spot 140	1398.26	209380	0.274511	8.87643	0.981436	4.27332	3.93372	0.275108	3.80932	0.968377	0.850201	1566.68	52.9823	1688.24	32.3788	1842.71	17.7629	1842.71	17.7629
SR12-Spot 25	125.044	610498	0.23811	8.54664	0.990337	5.39508	4.59244	0.33442	4.48439	0.976472	0.973215	1859.77	72.4502	1884.07	39.3589	1910.95	17.7776	1910.95	17.7776
SR12-Spot 56	100.757	86214.7	0.516986	5.46183	0.963374	13.256	3.73983	0.525107	3.61362	0.966252	1.01483	2720.8	80.2104	2698.05	35.3241	2681.04	15.9339	2681.04	15.9339
SR13-Spot 148	284.936	151981	1.27991	19.1846	1.69351	0.214349	2.15406	0.0298245	1.33117	0.617982	0.960722	189.45	2.4852	197.195	3.86071	290.875	38.6666	189.45	2.4852
SR13-Spot 291	256.813	40869.2	0.493779	19.7554	2.09976	0.209115	2.71591	0.0299619	1.72255	0.634244	0.987033	190.31	3.23026	192.81	4.76943	223.543	48.558	190.31	3.23026
SR13-Spot 199	411.583	54407.6	1.27463	20.131	1.80877	0.2076	2.23402	0.0303104	1.31118	0.586917	1.00498	192.49	2.48659	191.537	3.89962	179.776	42.1787	192.49	2.48659
SR13-Spot 255	142.899	22948.7	0.563364	19.7099	2.9368	0.213148	3.29615	0.0304694	1.49659	0.454041	0.98621	193.485	2.85265	196.191	5.88043	228.844	67.8478	193.485	2.85265
SR13-Spot 78	177.17	32261.8	0.904595	19.498	2.7057	0.220099	3.24853	0.0311248	1.79782	0.553425	0.978178	197.584	3.49832	201.992	5.95038	253.783	62.2107	197.584	3.49832
SR13-Spot 168	224.318	25397.7	0.94497	19.3663	1.86284	0.221779	2.15865	0.0311506	1.09068	0.505263	0.97225	197.746	2.12404	203.39	3.97871	269.306	42.7273	197.746	2.12404
SR13-Spot 39	127.691	42444.8	0.334455	19.381	2.65582	0.221633	3.22068	0.0311536	1.82192	0.565695	0.972926	197.764	3.5484	203.268	5.93301	267.567	60.934	197.764	3.5484
SR13-Spot 302	495.219	165012	0.592222	20.0734	1.51097	0.215264	2.2565	0.0313395	1.67594	0.742716	1.00488	198.926	3.28297	197.961	4.05854	186.446	35.19	198.926	3.28297
SR13-Spot 187	259.186	51676.5	0.289521	18.4065	4.08157	0.234945	4.33004	0.0313642	1.44569	0.333875	0.929102	199.081	2.83411	214.272	8.36469	384.68	91.712	199.081	2.83411
SR13-Spot 95	74.4543	9183.85	0.448847	19.5478	3.23266	0.221291	3.79366	0.0313733	1.98539	0.523344	0.981053	199.138	3.89322	202.984	6.97975	247.891	74.4585	199.138	3.89322
SR13-Spot 165	297.572	94623.4	1.06993	19.6185	1.36045	0.221062	1.80198	0.0314542	1.18166	0.655757	0.984466	199.643	2.32295	202.794	3.31252	239.585	31.3454	199.643	2.32295
SR13-Spot 207	141.815	54663.3	0.602654	20.1268	2.3178	0.216117	2.88052	0.0315474	1.71032	0.593753	1.00781	200.226	3.37186	198.673	5.19779	180.259	54.026	200.226	3.37186
SR13-Spot 266	75.161	18188.8	0.867936	18.6141	3.86272	0.23427	4.16843	0.0316269	1.5669	0.375897	0.939195	200.723	3.09666	213.718	8.03375	359.427	87.1976	200.723	3.09666
SR13-Spot 150	53.3289	8192.02	0.452674	19.7287	3.90873	0.226264	4.42833	0.0323752	2.08132	0.470001	0.991727	205.397	4.20757	207.11	8.29681	226.637	90.3382	205.397	4.20757
SR13-Spot 246	187.777	130584	0.650879	19.326	2.45964	0.242455	2.82784	0.0339838	1.39529	0.493413	0.977337	215.433	2.95626	220.429	5.60325	274.082	56.3642	215.433	2.95626
SR13-Spot 221	36.2205	12112.3	0.68854	19.864	5.23274	0.240571	5.69191	0.0346584	2.23969	0.393487	1.00343	219.638	4.83636	218.888	11.208	210.852	121.362	219.638	4.83636
SR13-Spot 62	336.277	91128.3	0.854818	19.2524	1.76004	0.249307	2.22339	0.0348111	1.35858	0.611039	0.976	220.589	2.94618	226.013	4.5052	282.866	40.266	220.589	2.94618
SR13-Spot 279	189.86	61172.4	0.213167	19.536	2.0735	0.252621	2.47741	0.0357934	1.3558	0.547263	0.991266	226.705	3.02024	228.703	5.07319	249.287	47.735	226.705	3.02024
SR13-Spot 123	511.289	67526.1	0.476028	18.8227	1.53367	0.277771	2.01515	0.0379199	1.30717	0.64867	0.963996	239.927	3.0786	248.888	4.4481	334.217	34.7667	239.927	3.0786
SR13-Spot 235	76.2812	9685.55	0.566307	19.8345	2.17485	0.267277	2.63354	0.0384488	1.48511	0.56392	1.01121	243.211	3.54465	240.514	5.63981	214.29	50.3826	243.211	3.54465
SR13-Spot 124	75.7298	11076.5	1.05405	19.6837	3.19085	0.269955	3.52331	0.0385388	1.49404	0.424046	1.00458	243.769	3.57402	242.658	7.60487	231.896	73.6642	243.769	3.57402
SR13-Spot 195	677.851	75007.1	0.560611	19.3912	1.4468	0.274907	2.01103	0.0386625	1.39679	0.694563	0.991596	244.537	3.35169	246.609	4.40309	266.389	33.1752	244.537	3.35169
SR13-Spot 213	1339.66	33003.9	0.975537	16.373	4.33884	0.326177	9.99343	0.0387329	9.0024	0.900831	0.854631	244.974	21.6399	286.643	24.9623	641.94	93.3336	244.974	21.6399
SR13-Spot 63	414.509	36106.9	0.870743	19.1031	1.44033	0.281039	2.04117	0.0389375	1.44631	0.70857	0.979173	246.244	3.49429	251.481	4.54691	300.647	32.8578	246.244	3.49429
SR13-Spot 200	638.55	212343	0.493843	19.7529	1.43877	0.272171	2.04419	0.0389915	1.45212	0.710366	1.0088	246.579	3.51301	244.428	4.44068	223.795	33.2604	246.579	3.51301
SR13-Spot 179	289.281	36028.3	0.269645	19.348	1.99583	0.279661	2.40811	0.0392434	1.34745	0.559549	0.991028	248.142	3.28006	250.388	5.34376	271.468	45.7395	248.142	3.28006
SR13-Spot 146	385.031	160537	0.28114	19.2848	1.7235	0.281101	2.29477	0.0393167	1.51509	0.660238	0.988333	248.596	3.69477	251.531	5.11273	279.012	39.4459	248.596	3.69477
SR13-Spot 292	204.58	34091.5	0.331006	19.3279	2.36721	0.281548	2.94132	0.0394671	1.74575	0.593527	0.990647	249.529	4.27293	251.885	6.56139	273.86	54.2574	249.529	4.27293
SR13-Spot 253	108.614	27521.1	0.517091	19.5875	3.04433	0.2781	3.29404	0.0395073	1.25806	0.38192	1.00253	249.778	3.08225	249.149	7.27782	243.249	70.1574	249.778	3.08225
SR13-Spot 178	457.284	103433	0.519254	18.6291	1.71948	0.29389	2.29429	0.0397078	1.51893	0.66205	0.959501	251.022	3.73957	261.617	5.29138	357.602	38.8175	251.022	3.73957
SR13-Spot 159	155.218	28804.2	0.524363	19.2825	2.55797	0.28397	2.87439	0.0397132	1.31106	0.45612	0.989176	251.055	3.22822	253.802	6.45504	279.285	58.5636	251.055	3.22822
SR13-Spot 17	601.841	126661	0.206582	19.4499	1.36711	0.282718	1.94514	0.0398813	1.38368	0.711352	0.997175	252.097	3.42088	252.811	4.35316	259.419	31.3859	252.097	3.42088
SR13-Spot 10	358.044	141133	0.620786	19.4788	1.53301	0.283269	2.01059	0.0400184	1.3009	0.647025	0.998814	252.947	3.22688	253.247	4.50649	256.008	35.2631	252.947	3.22688
SR13-Spot 264	172.274	55886.7	0.362503	19.966	2.14048	0.276403	2.55098	0.0400251	1.38775	0.544005	1.02094	252.989	3.44284	247.8	5.60914	198.924	49.7234	252.989	3.44284
SR13-Spot 116	182.93	96580.2	0.352683	19.5409	1.77313	0.28299	2.12594	0.0401065	1.17286	0.551691	1.00184	253.493	2.91542	253.027	4.76136	248.706	40.8249	253.493	2.91542
SR13-Spot 29	436.191	184444	0.202286	19.3622	1.28976	0.285757	1.98382	0.0401283	1.50734	0.759815	0.993786	253.628	3.74881	255.214	4.47686	269.789	29.554	253.628	3.74881
SR13-Spot 270	523.832	260989	0.30942	19.1967	1.1228	0.288238	1.96031	0.0401307	1.6069	0.819717	0.986278	253.643	3.99664	257.172	4.45361	289.469	25.663	253.643	3.99664
SR13-Spot 201	168.376	27753.6	0.344822	19.216	2.26312	0.28868	2.68345	0.0402327	1.44194	0.537346	0.987399	254.275	3.59513	257.52	6.10381	287.144	51.7158	254.275	3.59513
SR13-Spot 277	549.445	52821.2	0.317243	19.1823	1.37955	0.289321	2.25628	0.0402512	1.7854	0.791301	0.985913	254.39	4.45343	258.025	5.14098	291.157	31.5358	254.39	4.45343
SR13-Spot 48	506.253	75813.5	0.228846	19.545	1.64445	0.284257	1.93741	0.0402944	1.02436	0.528728	1.00247	254.658	2.55776	254.029	4.35424	248.215	37.8796	254.658	2.55776
SR13-Spot 171	295.338	42118	0.366109	19.2313	1.91989	0.290382	2.47236	0.0405021	1.55775	0.630067	0.988736	255.944	3.90887	258.86	5.64934	285.33	43.9133	255.944	3.90887
SR13-Spot 306	874.408	187952	0.266988	19.4405	0.842306	0.287345	1.67527	0.0405143	1.44812	0.86441	0.998257	256.02	3.63484	256.467	3.79688	260.577	19.3584	256.02	3.63484
SR13-Spot 248	187.481	40851.6	0.414043	19.2859	1.51079	0.290257	1.93019	0.0405996	1.2013	0.622376	0.991448	256.549	3.0214	258.761	4.40898	278.876	34.5926	256.549	3.0214
SR13-Spot 254	427.455	79736	0.421501	19.09	1.58339	0.293885	2.59671	0.0406894	2.0581	0.792581	0.98277	257.105	5.18735	261.613	5.9888	302.199	36.0941	257.105	5.18735
SR13-Spot 304	146.785	56330.8	0.27465	19.032	2.46797	0.295753	2.95365	0.0408237	1.62271	0.54939	0.980458	257.937	4.10293	263.078	6.84547	309.138	56.1845	257.937	4.10293
SR13-Spot 33	344.76	27288.8	0.379217	19.1986	1.22898	0.293412	1.90569	0.040855	1.45645	0.764264	0.988091	258.13	3.68526	261.241	4.3896	289.255	28.074	258.13	3.68526
SR13-Spot 160	609.639	144847	0.214379	18.9578	1.0521	0.297416	1.68342	0.0408931	1.31415	0.780643	0.977254	258.366	3.32819	264.38	3.91842	317.987	23.9299	258.366	3.32819
SR13-Spot 90	244.171	43347.9	0.403181	19.4236	1.7674	0.290968	2.22072	0.0409896	1.34459	0.605472	0.998625	258.964	3.41299	259.321	5.08226	262.54	40.5679	258.964	3.41299
SR13-Spot 21	393.956	113510	0.245451	19.0862	1.54031	0.296354	2.04838	0.0410232	1.3503	0.659203	0.983394	259.172	3.43017	263.549	4.75478	302.636	35.1146	259.172	3.43017
SR13-Spot 85	495.723	44142.5	0.278896	19.0613	1.27388	0.296781	1.95281	0.0410287	1.48009	0.757932	0.982277	259.206	3.76038	263.883	4.53797	305.616	29.0073	259.206	3.76038
SR13-Spot 86	243.313	36467	0.511237	19.1445	1.74613	0.295846	2.24505	0.041078	1.41113	0.628551	0.986172	259.511	3.5893	263.15	5.20441	295.673	39.8644	259.511	3.5893
SR13-Spot 3	216.489	41493.2	0.428939	19.3334	2.31398	0.293959	2.71859	0.0412185	1.42698	0.524896	0.995074	260.381	3.64155	261.671	6.27113	273.208	53.0464	260.381	3.64155
SR13-Spot 13	282.606	135759	0.290737	19.4389	2.1042	0.292388	2.58574	0.0412221	1.5028	0.581187	0.99987	260.404	3.83537	260.438	5.94002	260.764	48.3359	260.404	3.83537
SR13-Spot 262	511.919	116909	0.360124	19.1904	1.82526	0.297427	2.22157	0.0413963	1.26641	0.570052	0.989008	261.482	3.24518	264.389	5.1712	290.198	41.7132	261.482	3.24518
SR13-Spot 275	195.593	43245.6	0.37889	19.2552	2.25479	0.29647	3.08249	0.0414026	2.10182	0.681858	0.991963	261.521	5.38669	263.64	7.15743	282.533	51.6129	261.521	5.38669
SR13-Spot 65	1004.3	58843	0.210506	19.2853	1.27005	0.296271	1.59967	0.0414395	0.972587	0.607991	0.993419	261.749	2.49475	263.483	3.71241	278.952	29.0754	261.749	2.49475
SR13-Spot 80	229.508	142847	0.388503	18.8776	1.58527	0.30312	2.64171	0.041501	2.11318	0.799929	0.975064	262.13	5.42817	268.834	6.23951	327.618	35.9561	262.13	5.42817
SR13-Spot 177	238.322	32287.7	0.26173	19.0655	1.96433	0.300466	2.49541	0.0415474	1.53899	0.616729	0.983704	262.417	3.95748	266.764	5.85428	305.101	44.7498	262.417	3.95748
SR13-Spot 137	158.409	164808	0.288206	18.8403	2.00476	0.305054	2.56391	0.0416835	1.5983	0.623383	0.97381	263.26	4.12292	270.34	6.08536	332.105	45.4532	263.26	4.12292
SR13-Spot 309	335.741	163200	0.327718	19.3474	1.37656	0.298075	1.94929	0.041826	1.38015	0.708027	0.997152	264.142	3.57187	264.896	4.54501	271.55	31.5624	264.142	3.57187
SR13-Spot 205	205.416	29039.8	0.899825	19.2943	1.66763	0.299682	2.33564	0.041936	1.63531	0.700153	0.995005	264.822	4.24291	266.152	5.46845	277.891	38.1697	264.822	4.24291
SR13-Spot 51	277.868	58634.1	0.242276	18.9246	1.67308	0.307359	2.12584	0.0421863	1.31149	0.616926	0.978829	266.371	3.42223	272.132	5.07476	322.009	38.0103	266.371	3.42223
SR13-Spot 260	374.529	151002	0.300666	19.1897	1.13392	0.304544	1.83771	0.0423854	1.44617	0.786939	0.991326	267.602	3.79074	269.943	4.35613	290.306	25.8944	267.602	3.79074
SR13-Spot 94	143.164	32547	0.266842	19.3205	2.62075	0.302658	2.95429	0.0424102	1.36364	0.46158	0.99732	267.755	3.57643	268.474	6.96967	274.731	60.0556	267.755	3.57643
SR13-Spot 89	402.297	45375.3	0.328038	19.3077	1.59943	0.304667	2.04336	0.0426634	1.27168	0.622345	0.997339	269.321	3.35433	270.039	4.84512	276.252	36.6383	269.321	3.35433
SR13-Spot 216	612.33	273801	0.42012	19.101	1.37633	0.309443	1.87676	0.0428683	1.27591	0.679845	0.988449	270.587	3.38099	273.749	4.50335	300.894	31.3963	270.587	3.38099
SR13-Spot 170	116.62	234441	0.201677	19.2021	2.32853	0.309596	2.77406	0.0431165	1.50777	0.543524	0.993623	272.121	4.01756	273.868	6.65901	288.84	53.2262	272.121	4.01756
SR13-Spot 261	266.054	34796.9	0.270959	19.4894	1.22572	0.309552	1.71553	0.0437552	1.20026	0.699648	1.00816	276.067	3.24359	273.833	4.11756	254.782	28.1887	276.067	3.24359
SR13-Spot 181	1189.42	379952	0.223854	19.2747	0.975577	0.313636	1.65424	0.0438442	1.33595	0.80759	0.998634	276.617	3.61729	276.995	4.01034	280.213	22.3073	276.617	3.61729
SR13-Spot 211	155.78	33382.9	0.30541	19.5158	1.89383	0.314175	2.30766	0.0444689	1.31859	0.571398	1.01104	280.474	3.619	277.412	5.60175	251.688	43.5597	280.474	3.619
SR13-Spot 111	410.379	182500	0.426004	19.2711	1.71736	0.31959	2.12393	0.0446682	1.2497	0.588389	1.00041	281.704	3.44464	281.587	5.22311	280.64	39.3066	281.704	3.44464
SR13-Spot 224	396.249	63110	0.111111	19.6137	1.45167	0.322529	2.02936	0.0458803	1.41808	0.698782	1.01879	289.179	4.01018	283.846	5.02523	240.153	33.4611	289.179	4.01018
SR13-Spot 230	166.894	78715	0.200586	18.9048	2.11282	0.34	2.46193	0.0466177	1.26377	0.513325	0.988393	293.723	3.62869	297.172	6.34288	324.354	47.9599	293.723	3.62869
SR13-Spot 6	232.414	52899.8	0.328298	18.7228	1.70944	0.401589	2.2225	0.054532	1.42032	0.639065	0.998499	342.285	4.73474	342.8	6.46604	346.311	38.6683	342.285	4.73474
SR13-Spot 91	453.267	105647	0.5736	18.2671	1.35029	0.454791	2.13311	0.0602531	1.65132	0.774138	0.990898	377.164	6.04949	380.629	6.77111	401.735	30.2471	377.164	6.04949
SR13-Spot 310	184.092	46867.3	0.384153	17.5228	1.34831	0.560501	1.61752	0.0712326	0.893559	0.552424	0.89763	443.577	3.83033	451.852	5.89926	494.165	29.7099	443.577	3.83033
SR13-Spot 151	367.874	71938	0.583606	17.6817	0.806994	0.567145	1.89189	0.0727306	1.71115	0.904462	0.954285	452.586	7.4788	456.166	6.95213	474.267	17.8502	452.586	7.4788
SR13-Spot 101	587.426	1.1036e+06	0.0267633	16.3726	1.04979	0.819854	1.6957	0.0973536	1.33168	0.785324	0.932846	598.882	7.61593	607.967	7.7569	641.994	22.5912	598.882	7.61593
SR13-Spot 212	190.941	115242	0.364135	15.1663	1.32961	1.20934	2.04173	0.133023	1.54945	0.758891	1.00095	805.087	11.7269	804.888	11.3483	804.319	27.8609	805.087	11.7269
SR13-Spot 311	319.761	58753	0.326281	13.3818	1.15875	1.91082	1.69698	0.185453	1.23978	0.730579	1.03343	1096.7	12.503	1084.87	11.3118	1061.22	23.334	1061.22	23.334
SR13-Spot 100	115.064	75716	0.277305	13.1345	1.44986	1.92529	2.15251	0.183404	1.59098	0.739128	0.988077	1085.54	15.895	1089.9	14.3857	1098.64	28.9924	1098.64	28.9924
SR13-Spot 267	52.0287	104584	0.315725	12.8091	1.85256	2.04078	2.34831	0.189589	1.4431	0.614529	0.974331	1119.15	14.8263	1129.22	16.0041	1148.63	36.8163	1148.63	36.8163
SR13-Spot 69	68.2335	120028	0.631619	12.588	1.67292	2.16843	2.01455	0.19797	1.12238	0.55714	0.984147	1164.41	11.9568	1170.98	14.0003	1183.16	33.0806	1183.16	33.0806
SR13-Spot 167	134.751	71651.1	0.238769	12.5692	1.31411	2.06533	1.73417	0.188276	1.13158	0.652517	0.937537	1112.03	11.5579	1137.39	11.8646	1186.12	25.96	1186.12	25.96
SR13-Spot 45	104.523	173391	0.497879	12.4539	1.12185	2.28004	1.71604	0.205943	1.29856	0.756719	1.00242	1207.17	14.2956	1206.13	12.1127	1204.25	22.0839	1204.25	22.0839
SR13-Spot 20	172.636	95718.9	0.314189	12.3652	1.28401	2.24461	1.70134	0.201299	1.11619	0.656063	0.970401	1182.29	12.0572	1195.1	11.9514	1218.36	25.2337	1218.36	25.2337
SR13-Spot 47	85.316	81088.5	0.156522	12.3158	1.0172	2.36315	1.57236	0.211083	1.19901	0.762556	1.00685	1234.58	13.4717	1231.54	11.2188	1226.19	19.9944	1226.19	19.9944
SR13-Spot 217	47.3114	30284.8	0.570202	12.2268	2.00244	2.16629	2.54915	0.1921	1.57748	0.618823	0.913163	1132.74	16.3869	1170.29	17.7107	1240.46	39.2385	1240.46	39.2385
SR13-Spot 244	33.1027	40310.3	0.226489	11.4618	1.72842	2.90747	2.32045	0.241694	1.54825	0.667218	1.02165	1395.5	19.4273	1383.86	17.5334	1365.93	33.2833	1365.93	33.2833
SR13-Spot 18	104.347	234012	0.241484	11.4087	1.02942	2.90983	1.80448	0.24077	1.48204	0.82131	1.01152	1390.7	18.5392	1384.47	13.637	1374.86	19.7979	1374.86	19.7979
SR13-Spot 190	195.488	733227	0.208027	11.4035	0.987019	2.82179	1.82529	0.233379	1.53541	0.841186	0.982877	1352.18	18.7287	1361.34	13.685	1375.74	18.9801	1375.74	18.9801
SR13-Spot 245	237.545	135174	0.156638	11.3678	1.04127	2.30758	1.82887	0.190252	1.5035	0.822093	0.81254	1122.74	15.4922	1214.62	12.9564	1381.77	20.007	1381.77	20.007
SR13-Spot 166	155.551	146610	0.22846	11.348	1.1295	3.02728	1.48935	0.249155	0.97077	0.651809	1.03538	1434.12	12.4821	1414.52	11.368	1385.11	21.6921	1385.11	21.6921
SR13-Spot 135	209.89	62357.8	0.477157	11.3134	0.947402	2.91446	1.40662	0.239138	1.03971	0.739158	0.993701	1382.22	12.9349	1385.67	10.6343	1390.98	18.1791	1390.98	18.1791
SR13-Spot 8	186.667	168005	0.630357	11.309	1.23493	2.95028	1.97977	0.241983	1.54739	0.781603	1.00379	1397	19.4352	1394.92	15.0145	1391.73	23.6942	1391.73	23.6942
SR13-Spot 138	453.031	212339	0.224422	11.2979	1.04541	2.79579	1.54175	0.229087	1.13318	0.734998	0.954152	1329.71	13.6156	1354.41	11.5309	1393.61	20.0526	1393.61	20.0526
SR13-Spot 87	121.864	115069	0.330095	11.2973	1.33857	2.97884	1.78801	0.244074	1.18542	0.662981	1.01015	1407.84	14.9922	1402.23	13.5931	1393.7	25.676	1393.7	25.676
SR13-Spot 77	201.046	127381	0.218582	11.2835	1.11369	2.73848	1.61401	0.224106	1.16821	0.723794	0.933734	1303.53	13.7872	1338.96	12.0053	1396.04	21.3554	1396.04	21.3554
SR13-Spot 19	271.244	70727.8	0.295906	11.282	1.14133	2.52918	1.9941	0.20695	1.63517	0.820006	0.868404	1212.55	18.0742	1280.46	14.5115	1396.3	21.8846	1396.3	21.8846
SR13-Spot 215	75.7401	43597.6	0.349184	11.2769	1.32878	2.75543	1.91808	0.22536	1.38325	0.721164	0.937702	1310.13	16.3996	1343.56	14.2908	1397.17	25.4761	1397.17	25.4761
SR13-Spot 210	253.481	139314	0.320114	11.2748	1.13191	2.9869	1.87791	0.244247	1.49844	0.79793	1.00802	1408.74	18.9619	1404.29	14.2863	1397.53	21.7004	1397.53	21.7004
SR13-Spot 218	179.209	211972	0.304547	11.2637	0.882093	3.08616	1.46131	0.252114	1.16505	0.797264	1.03569	1449.37	15.1223	1429.26	11.2071	1399.42	16.9064	1399.42	16.9064
SR13-Spot 265	491.577	136332	0.439055	11.2629	1.11174	2.91276	2.03802	0.237932	1.70809	0.838113	0.983127	1375.94	21.1635	1385.23	15.4061	1399.55	21.3077	1399.55	21.3077
SR13-Spot 300	232.552	248137	0.307272	11.2603	1.11314	2.99829	1.80433	0.244863	1.42004	0.787019	1.00852	1411.93	18.0062	1407.19	13.7395	1400	21.3334	1400	21.3334
SR13-Spot 241	165.104	98037.9	0.56143	11.2528	1.11242	2.68848	2.05823	0.219415	1.73171	0.841359	0.912589	1278.78	20.0867	1325.29	15.234	1401.27	21.3159	1401.27	21.3159
SR13-Spot 281	462.867	392193	0.270948	11.2506	0.805718	2.87671	1.56644	0.234731	1.34334	0.857574	0.969754	1359.25	16.4628	1375.83	11.8031	1401.64	15.4379	1401.64	15.4379
SR13-Spot 112	123.655	109964	0.26649	11.2506	1.11414	2.98944	1.86391	0.243929	1.49428	0.801689	1.00388	1407.09	18.8894	1404.94	14.1828	1401.65	21.3476	1401.65	21.3476
SR13-Spot 46	281.311	212223	0.206278	11.2406	0.835035	3.06672	1.54767	0.250013	1.30307	0.841957	1.02508	1438.54	16.801	1424.42	11.8511	1403.35	15.9959	1403.35	15.9959
SR13-Spot 143	238.005	73818.2	0.294274	11.2276	0.889312	2.98847	1.7554	0.243353	1.51346	0.862172	0.998964	1404.1	19.0955	1404.69	13.3559	1405.56	17.0306	1405.56	17.0306
SR13-Spot 204	247.725	236987	0.23316	11.2195	1.14336	3.02048	1.82449	0.245781	1.42179	0.77928	1.00692	1416.68	18.0826	1412.81	13.9186	1406.95	21.8918	1406.95	21.8918
SR13-Spot 196	75.8009	28736.2	0.348124	11.2177	1.6982	2.91314	2.31195	0.237007	1.56883	0.678574	0.974317	1371.12	19.3769	1385.33	17.4778	1407.26	32.5151	1407.26	32.5151
SR13-Spot 220	98.7544	54946.9	0.227682	11.2133	1.33935	2.97666	1.96755	0.242082	1.44131	0.732543	0.992551	1397.51	18.1088	1401.68	14.9554	1408	25.641	1408	25.641
SR13-Spot 308	193.712	92107.5	0.20761	11.2114	0.89146	2.9971	1.47511	0.243703	1.17527	0.796732	0.998289	1405.92	14.8457	1406.88	11.2313	1408.33	17.0653	1408.33	17.0653
SR13-Spot 68	607.341	159980	0.21939	11.211	1.01322	2.69088	1.95592	0.218796	1.67302	0.855363	0.905648	1275.51	19.3611	1325.95	14.4802	1408.39	19.3961	1408.39	19.3961
SR13-Spot 73	108.146	77732.4	0.24355	11.2107	1.45748	3.01053	2.77222	0.24478	2.35817	0.850643	1.00216	1411.5	29.8937	1410.29	21.133	1408.45	27.901	1408.45	27.901
SR13-Spot 239	235.793	142745	0.205411	11.2099	1.08494	3.03015	1.62871	0.246358	1.21475	0.745833	1.00787	1419.66	15.4785	1415.24	12.4348	1408.58	20.7685	1408.58	20.7685
SR13-Spot 40	169.055	190542	0.209994	11.2082	1.09676	2.98971	1.70237	0.243034	1.302	0.764812	0.995443	1402.45	16.4101	1405.01	12.9538	1408.87	20.994	1408.87	20.994
SR13-Spot 256	192.698	56262.8	0.523568	11.2022	1.29514	3.07129	1.99577	0.249531	1.51845	0.760834	1.01855	1436.06	19.5477	1425.56	15.2884	1409.9	24.7882	1409.9	24.7882
SR13-Spot 92	228.356	235351	0.236247	11.2014	1.16508	2.96251	1.94698	0.240675	1.55991	0.801195	0.985936	1390.21	19.5071	1398.06	14.7813	1410.04	22.2983	1410.04	22.2983
SR13-Spot 223	125.463	175629	0.273383	11.2003	1.37795	2.96723	1.95313	0.241035	1.38419	0.708705	0.987134	1392.08	17.3306	1399.27	14.8339	1410.22	26.372	1410.22	26.372
SR13-Spot 97	204.547	56298	0.32904	11.1993	1.2744	2.94525	2.29139	0.239229	1.9043	0.831069	0.980358	1382.69	23.6983	1393.63	17.3708	1410.39	24.3896	1410.39	24.3896
SR13-Spot 249	338.847	161921	0.475596	11.1979	1.13435	3.07619	1.93219	0.249832	1.56416	0.809529	1.01912	1437.61	20.1557	1426.78	14.807	1410.64	21.7083	1410.64	21.7083
SR13-Spot 191	88.5876	103787	0.343277	11.19	1.34232	2.95621	2.16615	0.23992	1.70011	0.784855	0.9818	1386.28	21.2066	1396.44	16.4366	1411.98	25.684	1411.98	25.684
SR13-Spot 107	82.6212	268437	0.310016	11.1823	1.22845	2.92102	2.20304	0.236899	1.82875	0.830101	0.969753	1370.56	22.5789	1387.37	16.6658	1413.31	23.5007	1413.31	23.5007
SR13-Spot 27	174.076	231496	0.267176	11.1767	1.09659	3.08354	2.07476	0.249956	1.76129	0.848911	1.01696	1438.25	22.7049	1428.61	15.9091	1414.26	20.9753	1414.26	20.9753
SR13-Spot 189	51.9148	51915.4	0.292708	11.1697	1.55891	3.08329	2.02886	0.249779	1.29849	0.640008	1.01545	1437.33	16.7293	1428.55	15.5568	1415.46	29.8146	1415.46	29.8146
SR13-Spot 192	91.8949	173058	0.349292	11.1673	1.23273	3.01155	1.91512	0.243915	1.46563	0.765294	0.993749	1407.02	18.5264	1410.55	14.5994	1415.87	23.5744	1415.87	23.5744
SR13-Spot 162	277.035	87480	0.673781	11.1646	0.921802	2.99557	1.42768	0.242561	1.0902	0.763621	0.988463	1400	13.7192	1406.49	10.8687	1416.34	17.6269	1416.34	17.6269
SR13-Spot 303	168.68	83592.9	0.309312	11.1644	1.05884	2.77308	1.78697	0.224541	1.43949	0.805546	0.92195	1305.82	17.0157	1348.32	13.3364	1416.37	20.2474	1416.37	20.2474
SR13-Spot 209	710.644	1.18637e+06	0.45551	11.159	0.803262	3.00807	1.77751	0.243451	1.58566	0.892068	0.991049	1404.61	20.013	1409.67	13.5463	1417.3	15.3581	1417.3	15.3581
SR13-Spot 31	242.658	213126	0.33717	11.1585	0.808747	3.1121	1.53612	0.251859	1.30598	0.850183	1.02164	1448.06	16.9378	1435.69	11.8049	1417.38	15.4628	1417.38	15.4628
SR13-Spot 203	125.359	84644.3	0.400769	11.1542	1.12745	3.0943	1.76231	0.250323	1.35448	0.768579	1.01553	1440.14	17.4811	1431.28	13.5245	1418.11	21.5543	1418.11	21.5543
SR13-Spot 268	126.895	117496	0.376268	11.1528	1.17528	3.00869	1.75701	0.243365	1.30606	0.743343	0.989992	1404.17	16.4795	1409.82	13.3908	1418.36	22.4682	1418.36	22.4682
SR13-Spot 140	133.181	132191	0.342623	11.1426	1.27391	3.03357	2.02784	0.245155	1.57774	0.778044	0.995313	1413.44	20.025	1416.1	15.4868	1420.1	24.348	1420.1	24.348
SR13-Spot 98	219.272	62738.7	0.289831	11.1425	1.11836	3.01124	1.7237	0.243348	1.31164	0.760946	0.988703	1404.08	16.5489	1410.47	13.1396	1420.12	21.3748	1420.12	21.3748
SR13-Spot 114	160.317	53339.6	0.30329	11.1409	0.906048	2.99463	1.77596	0.24197	1.52745	0.860071	0.983478	1396.93	19.1839	1406.26	13.5193	1420.4	17.3161	1420.4	17.3161
SR13-Spot 156	64.2544	320111	0.440423	11.1383	1.41286	3.00968	2.02199	0.243129	1.44647	0.71537	0.987397	1402.94	18.2368	1410.07	15.4118	1420.85	27.0013	1420.85	27.0013
SR13-Spot 37	323.742	123494	0.336508	11.1322	0.964561	3.11406	1.94082	0.251424	1.68416	0.867758	1.01683	1445.82	21.8126	1436.17	14.9177	1421.88	18.4307	1421.88	18.4307
SR13-Spot 99	317.825	64613.5	0.326388	11.1282	0.959674	3.00284	1.62752	0.242358	1.31447	0.807655	0.983391	1398.94	16.5303	1408.34	12.3977	1422.57	18.3356	1422.57	18.3356
SR13-Spot 240	139.734	103503	0.697757	11.1188	0.890599	3.21633	1.55977	0.259368	1.28051	0.820963	1.04382	1486.61	17.0007	1461.1	12.0819	1424.2	17.0121	1424.2	17.0121
SR13-Spot 30	51.8826	76629.8	0.409582	11.1112	1.46399	3.00068	2.12158	0.241813	1.53552	0.723763	0.979393	1396.12	19.2752	1407.79	16.1589	1425.49	27.961	1425.49	27.961
SR13-Spot 25	384.909	312616	0.242583	11.1089	1.09661	3.04766	1.88346	0.245548	1.5313	0.813026	0.992694	1415.47	19.4606	1419.65	14.4005	1425.89	20.9426	1425.89	20.9426
SR13-Spot 1	198.392	275119	0.351832	11.0993	1.25255	3.0565	1.751	0.246048	1.22357	0.698783	0.993363	1418.06	15.5752	1421.86	13.3972	1427.54	23.9157	1427.54	23.9157
SR13-Spot 22	67.5806	105529	0.677747	11.0974	1.35258	3.1378	2.17062	0.252549	1.69767	0.782116	1.01663	1451.61	22.0661	1442.01	16.7151	1427.86	25.8246	1427.86	25.8246
SR13-Spot 234	191.605	430220	0.258572	11.0949	1.02328	3.10977	2.02882	0.250236	1.75186	0.863488	1.00797	1439.69	22.6036	1435.11	15.589	1428.3	19.5357	1428.3	19.5357
SR13-Spot 238	400.817	209787	0.42575	11.0943	1.14203	3.1139	1.7173	0.250555	1.28254	0.746833	1.00906	1441.34	16.5649	1436.13	13.1993	1428.4	21.8027	1428.4	21.8027
SR13-Spot 172	142.391	126277	0.259864	11.0875	1.27604	2.99821	2.02063	0.241099	1.56674	0.775371	0.974009	1392.41	19.6203	1407.16	15.3867	1429.56	24.3575	1429.56	24.3575
SR13-Spot 208	275.589	448190	0.384716	11.0855	1.20661	3.10319	1.84453	0.249495	1.39513	0.75636	1.00416	1435.87	17.9581	1433.48	14.1655	1429.92	23.031	1429.92	23.031
SR13-Spot 184	349.094	120765	0.248814	11.0825	0.945618	3.12446	1.7728	0.251138	1.49955	0.845862	1.00973	1444.34	19.4038	1438.73	13.6372	1430.43	18.0478	1430.43	18.0478
SR13-Spot 183	102.651	108804	0.556112	11.0809	1.2052	3.07192	1.70994	0.24688	1.213	0.709384	0.994172	1422.36	15.4825	1425.71	13.0992	1430.7	23.0017	1430.7	23.0017
SR13-Spot 251	92.5804	160292	0.440886	11.08	1.06113	3.07791	2.06644	0.247339	1.77318	0.858085	0.995715	1424.74	22.6663	1427.21	15.8382	1430.87	20.2514	1430.87	20.2514
SR13-Spot 133	168.513	55769.2	0.605097	11.0779	0.953778	2.90036	1.94718	0.233028	1.69759	0.871821	0.943494	1350.35	20.6818	1382.01	14.7033	1431.22	18.2016	1431.22	18.2016
SR13-Spot 43	235.884	154267	0.324791	11.0755	0.988635	3.08322	1.61673	0.247666	1.27923	0.791244	0.996359	1426.43	16.3695	1428.53	12.3963	1431.64	18.8658	1431.64	18.8658
SR13-Spot 35	136.379	131110	0.290647	11.0736	0.795203	3.06846	1.63077	0.246437	1.42375	0.873054	0.991694	1420.08	18.1464	1424.85	12.4892	1431.97	15.1738	1431.97	15.1738
SR13-Spot 110	202.074	153934	0.670289	11.0723	1.08403	3.16819	1.71491	0.254418	1.32883	0.77487	1.02027	1461.22	17.3738	1449.44	13.2361	1432.19	20.6848	1432.19	20.6848
SR13-Spot 75	135.164	124011	0.270046	11.071	1.03147	3.08226	1.63968	0.247489	1.27461	0.77735	0.995187	1425.51	16.301	1428.29	12.5713	1432.41	19.6812	1432.41	19.6812
SR13-Spot 64	133.014	139488	0.344146	11.0654	1.40098	3.11938	2.19372	0.250341	1.68809	0.769511	1.00478	1440.23	21.7881	1437.48	16.8689	1433.39	26.7288	1433.39	26.7288
SR13-Spot 144	339.548	145216	0.25503	11.0639	1.12698	3.09956	1.74121	0.248718	1.3273	0.762287	0.998763	1431.86	17.0424	1432.58	13.368	1433.64	21.5001	1433.64	21.5001
SR13-Spot 118	301.175	94485.9	0.231159	11.0599	0.84274	3.09183	1.35432	0.248009	1.06017	0.78281	0.995733	1428.2	13.5814	1430.67	10.3912	1434.32	16.0758	1434.32	16.0758
SR13-Spot 149	284.304	60777.3	0.247814	11.0569	0.904545	3.03406	1.87266	0.243307	1.63971	0.875606	0.978407	1403.87	20.6854	1416.23	14.3021	1434.85	17.2536	1434.85	17.2536
SR13-Spot 60	77.2702	70022.5	0.778143	11.0501	1.40136	3.17433	1.90003	0.2544	1.28309	0.675299	1.01748	1461.13	16.7748	1450.94	14.6719	1436.02	26.7265	1436.02	26.7265
SR13-Spot 214	386.949	108853	0.346564	11.047	0.766762	3.07775	1.48857	0.246591	1.2759	0.857131	0.989085	1420.87	16.2701	1427.17	11.4086	1436.55	14.622	1436.55	14.622
SR13-Spot 147	67.0085	65658.6	0.446269	11.0384	1.69129	3.09599	1.9762	0.247859	1.0222	0.517257	0.992617	1427.42	13.0886	1431.7	15.1682	1438.04	32.2479	1438.04	32.2479
SR13-Spot 186	278.503	187156	0.609078	11.0376	1.20441	3.15187	2.02513	0.252313	1.62805	0.803925	1.00849	1450.4	21.1454	1445.46	15.6114	1438.18	22.9632	1438.18	22.9632
SR13-Spot 257	431.442	64429.5	0.25867	11.0371	0.715251	3.04639	1.47829	0.243859	1.29374	0.875159	0.97807	1406.73	16.3506	1419.33	11.3012	1438.27	13.6365	1438.27	13.6365
SR13-Spot 280	55.7318	75194.7	0.414578	11.0302	1.52434	3.16049	2.09407	0.252834	1.43581	0.685653	1.00946	1453.07	18.6792	1447.56	16.1536	1439.46	29.0586	1439.46	29.0586
SR13-Spot 7	638.101	52486.2	0.273626	11.0286	0.876287	3.20331	1.71328	0.256223	1.47223	0.859303	1.02136	1470.49	19.3573	1457.96	13.2584	1439.74	16.7035	1439.74	16.7035
SR13-Spot 76	265.873	244677	0.692048	11.0285	0.792853	3.10199	1.59479	0.248116	1.38374	0.867664	0.99236	1428.75	17.7327	1433.19	12.2462	1439.75	15.113	1439.75	15.113
SR13-Spot 82	70.1082	84728.3	0.7478	11.0274	1.15395	3.04374	1.59958	0.243432	1.10773	0.692511	0.975393	1404.51	13.98	1418.66	12.2259	1439.95	21.9959	1439.95	21.9959
SR13-Spot 259	955.688	164513	0.19935	11.0271	0.956888	2.94549	1.74363	0.235569	1.45761	0.835961	0.946968	1363.62	17.9148	1393.69	13.218	1439.99	18.2394	1439.99	18.2394
SR13-Spot 271	51.3285	178066	0.341052	11.0259	1.53052	2.95848	2.2066	0.23658	1.58952	0.720349	0.950484	1368.9	19.6039	1397.02	16.7469	1440.21	29.1736	1440.21	29.1736
SR13-Spot 176	187.511	70253.7	0.307909	11.0243	0.920296	3.13157	1.90363	0.250386	1.66639	0.875376	0.999987	1440.47	21.5111	1440.48	14.6517	1440.48	17.5407	1440.48	17.5407
SR13-Spot 284	335.221	214370	0.352672	11.0226	0.96773	3.02925	2.02411	0.242169	1.77779	0.878305	0.97029	1397.96	22.3428	1415.02	15.4529	1440.77	18.4441	1440.77	18.4441
SR13-Spot 295	118.512	467512	0.510353	11.0218	1.21437	2.89616	1.59849	0.231514	1.03945	0.650274	0.931658	1342.43	12.5968	1380.91	12.0655	1440.9	23.1447	1440.9	23.1447
SR13-Spot 164	120.152	44711	0.392717	11.0177	1.06254	3.10279	1.79549	0.247938	1.44734	0.806097	0.990438	1427.83	18.537	1433.38	13.7883	1441.62	20.2488	1441.62	20.2488
SR13-Spot 50	230.001	492096	0.322287	11.0122	0.945384	3.15066	1.60165	0.251636	1.29288	0.807217	1.003	1446.91	16.7561	1445.16	12.3454	1442.58	18.0138	1442.58	18.0138
SR13-Spot 49	242.479	176769	0.349395	11.0121	1.17663	3.10237	1.98393	0.247778	1.59735	0.805143	0.989198	1427.01	20.4477	1433.28	15.2352	1442.59	22.4203	1442.59	22.4203
SR13-Spot 102	154.289	159484	0.380395	11.0117	0.943167	3.22145	1.86556	0.25728	1.60958	0.862786	1.02306	1475.91	21.2327	1462.33	14.4563	1442.65	17.9713	1442.65	17.9713
SR13-Spot 23	154.577	142300	0.50459	11.0097	0.791789	3.10106	1.57579	0.247619	1.36242	0.864594	0.988347	1426.18	17.4314	1432.95	12.0994	1443	15.0861	1443	15.0861
SR13-Spot 175	285.872	226419	0.261228	11.0056	0.966737	3.13	1.9181	0.249837	1.65666	0.863698	0.995792	1437.63	21.3479	1440.09	14.7613	1443.71	18.4178	1443.71	18.4178
SR13-Spot 222	194.521	268679	0.349235	11.0044	1.04661	3.11941	1.73877	0.248964	1.3885	0.798553	0.992522	1433.13	17.8423	1437.49	13.3701	1443.93	19.9391	1443.93	19.9391
SR13-Spot 105	261.841	88540.9	0.353522	11.0036	1.06311	3.10086	1.61263	0.247465	1.21259	0.751934	0.987067	1425.39	15.5067	1432.9	12.3821	1444.07	20.253	1444.07	20.253
SR13-Spot 121	155.908	171713	0.253585	11.0002	1.22291	3.01817	1.94843	0.240793	1.51686	0.778502	0.962741	1390.82	18.9762	1412.22	14.8614	1444.64	23.2958	1444.64	23.2958
SR13-Spot 193	192.346	64180.7	0.926363	11.0001	0.923923	3.1364	1.64509	0.250222	1.36113	0.827392	0.996504	1439.62	17.5613	1441.67	12.6663	1444.67	17.5998	1444.67	17.5998
SR13-Spot 16	652.439	107006	0.218955	10.9988	0.797061	3.10345	1.5916	0.247565	1.37764	0.865567	0.986864	1425.91	17.623	1433.55	12.2231	1444.89	15.1827	1444.89	15.1827
SR13-Spot 180	273.322	178987	0.277356	10.9928	0.856953	3.15285	1.76886	0.251368	1.54742	0.874811	0.999723	1445.53	20.038	1445.7	13.6366	1445.93	16.3213	1445.93	16.3213
SR13-Spot 66	143.666	55066.6	0.474278	10.9925	1.11764	2.61821	2.05971	0.208737	1.73012	0.83998	0.845163	1222.09	19.2603	1305.76	15.1349	1445.98	21.2863	1445.98	21.2863
SR13-Spot 128	123.962	79735.2	0.590259	10.9902	1.00166	3.1555	1.71202	0.25152	1.38841	0.810978	0.999955	1446.31	17.9876	1446.34	13.201	1446.38	19.0764	1446.38	19.0764
SR13-Spot 263	390.275	754301	0.329485	10.9899	1.05872	3.12548	1.63884	0.249121	1.25096	0.763323	0.991371	1433.94	16.0831	1438.98	12.6076	1446.42	20.1629	1446.42	20.1629
SR13-Spot 236	101.873	51871.1	0.420315	10.9896	1.06161	3.13897	1.57768	0.250189	1.16706	0.739737	0.995139	1439.45	15.0559	1442.3	12.1496	1446.48	20.2179	1446.48	20.2179
SR13-Spot 120	147.129	77857.8	1.15303	10.9886	1.20712	3.12155	1.97177	0.248777	1.55909	0.790704	0.98998	1432.17	20.0224	1438.02	15.1645	1446.66	22.9886	1446.66	22.9886
SR13-Spot 233	83.3646	72828.5	0.405171	10.9864	0.962992	3.06616	1.58395	0.244315	1.25759	0.79396	0.973782	1409.09	15.9176	1424.28	12.1283	1447.03	18.3383	1447.03	18.3383
SR13-Spot 58	80.1358	242371	0.760243	10.9857	1.55265	3.06662	2.15656	0.244335	1.49667	0.694008	0.973768	1409.2	18.945	1424.39	16.5142	1447.16	29.5678	1447.16	29.5678
SR13-Spot 106	30.585	160843	0.801367	10.9856	1.66092	3.04843	2.17509	0.242884	1.40441	0.645677	0.968563	1401.67	17.6922	1419.84	16.6317	1447.17	31.6298	1447.17	31.6298
SR13-Spot 72	208.965	111609	0.297016	10.9835	1.03578	3.15018	1.67536	0.250943	1.31682	0.785988	0.9971	1443.34	17.0287	1445.04	12.9131	1447.54	19.7231	1447.54	19.7231
SR13-Spot 67	446.372	74002.7	0.327491	10.9823	1.17054	3.18266	2.20067	0.253503	1.86354	0.846806	1.00606	1456.52	24.295	1452.96	17.0045	1447.74	22.2888	1447.74	22.2888
SR13-Spot 158	401.456	53507.9	0.261348	10.9822	0.945497	3.10329	2.07285	0.247178	1.84466	0.889912	0.983517	1423.9	23.5677	1433.51	15.9193	1447.77	18.0033	1447.77	18.0033
SR13-Spot 285	210.454	62843.7	0.486851	10.9719	0.866497	3.06125	1.46999	0.243602	1.18745	0.807798	0.969541	1405.39	14.9946	1423.05	11.2512	1449.55	16.495	1449.55	16.495
SR13-Spot 53	470.629	66812.8	0.221049	10.9707	1.01271	3.10947	1.86016	0.247412	1.56033	0.838812	0.983003	1425.11	19.9501	1435.03	14.2926	1449.76	19.278	1449.76	19.278
SR13-Spot 283	187.022	203499	0.222737	10.9695	1.41576	3.19271	1.94115	0.254007	1.32804	0.684151	1.00631	1459.11	17.3411	1455.4	15.0101	1449.96	26.9503	1449.96	26.9503
SR13-Spot 287	63.2668	121645	0.632687	10.9695	1.3453	3.17502	2.02711	0.252598	1.51636	0.748039	1.0013	1451.86	19.7124	1451.1	15.6542	1449.97	25.609	1449.97	25.609
SR13-Spot 269	235.487	112607	0.487507	10.9687	1.15454	3.10778	1.78385	0.247231	1.35983	0.762302	0.982119	1424.18	17.3764	1434.62	13.7043	1450.11	21.9771	1450.11	21.9771
SR13-Spot 206	60.2162	36475.4	0.818627	10.9656	1.40848	3.01199	2.16921	0.239544	1.64975	0.760529	0.954285	1384.33	20.5523	1410.66	16.5373	1450.64	26.8093	1450.64	26.8093
SR13-Spot 134	68.941	318705	0.448845	10.9636	1.15927	3.10069	1.8598	0.246554	1.45428	0.781956	0.979111	1420.68	18.5425	1432.86	14.2799	1450.99	22.0645	1450.99	22.0645
SR13-Spot 129	737.686	490502	0.299766	10.962	0.972091	3.07783	1.78923	0.244699	1.50212	0.839537	0.972307	1411.08	19.0367	1427.19	13.7131	1451.27	18.501	1451.27	18.501
SR13-Spot 225	62.1554	114877	0.352026	10.9543	1.42238	3.14427	2.04782	0.249806	1.47323	0.719413	0.989583	1437.48	18.9824	1443.6	15.7772	1452.61	27.0668	1452.61	27.0668
SR13-Spot 307	323.205	90089.3	0.343081	10.9527	1.01356	3.16966	1.55509	0.251785	1.17941	0.758418	0.99641	1447.68	15.2926	1449.8	12.0037	1452.89	19.2859	1452.89	19.2859
SR13-Spot 125	544.973	159415	0.356364	10.9493	0.937443	3.15327	1.57497	0.250408	1.2656	0.803569	0.991133	1440.58	16.3385	1445.8	12.1421	1453.47	17.8362	1453.47	17.8362
SR13-Spot 36	91.8106	108127	0.360748	10.9431	1.52733	3.06809	2.40905	0.243505	1.86301	0.773337	0.965857	1404.89	23.5177	1424.76	18.4502	1454.55	29.0564	1454.55	29.0564
SR13-Spot 276	510.474	168765	0.330743	10.937	0.800735	3.01584	1.3936	0.239224	1.14059	0.818448	0.94988	1382.66	14.1939	1411.63	10.6271	1455.62	15.2307	1455.62	15.2307
SR13-Spot 96	79.9486	108016	0.408183	10.9316	1.32099	3.1365	1.73046	0.248674	1.1178	0.645958	0.982897	1431.63	14.3505	1441.69	13.3238	1456.54	25.1238	1456.54	25.1238
SR13-Spot 293	108.561	60478.4	0.539987	10.9315	1.03157	3.1456	1.77464	0.249393	1.44402	0.8137	0.985432	1435.34	18.5814	1443.92	13.6736	1456.56	19.619	1456.56	19.619
SR13-Spot 113	176.62	234236	0.44654	10.9289	1.10857	2.96638	1.7674	0.235127	1.37651	0.778834	0.934312	1361.31	16.8923	1399.05	13.4221	1457.02	21.0822	1457.02	21.0822
SR13-Spot 108	477.929	98128.8	0.235494	10.9262	1.05887	3.0595	1.69069	0.242447	1.31804	0.779588	0.96014	1399.4	16.5801	1422.61	12.9389	1457.5	20.1357	1457.5	20.1357
SR13-Spot 278	88.6924	136372	0.43336	10.917	1.14075	3.25554	1.75825	0.257765	1.33796	0.760958	1.01323	1478.4	17.6761	1470.5	13.6586	1459.09	21.6883	1459.09	21.6883
SR13-Spot 242	322.226	121271	0.356517	10.9118	1.01522	3.16196	1.70253	0.250238	1.36673	0.802762	0.986103	1439.7	17.6345	1447.92	13.1343	1459.99	19.2991	1459.99	19.2991
SR13-Spot 314	99.4254	139851	0.431578	10.9063	1.13101	3.14664	1.83301	0.2489	1.44247	0.786943	0.980731	1432.8	18.5321	1444.18	14.1245	1460.95	21.4977	1460.95	21.4977
SR13-Spot 26	64.9475	332497	0.410946	10.898	1.88541	3.1595	2.30793	0.249727	1.33108	0.576744	0.982675	1437.07	17.1465	1447.32	17.8022	1462.4	35.8318	1462.4	35.8318
SR13-Spot 136	282.642	73586.8	0.349956	10.8941	1.23462	2.74108	1.85133	0.216577	1.37955	0.745165	0.863771	1263.76	15.8318	1339.67	13.7742	1463.08	23.4604	1463.08	23.4604
SR13-Spot 157	60.4586	144714	0.394801	10.8785	1.35025	3.14103	2.05013	0.247821	1.54268	0.752479	0.973676	1427.23	19.7507	1442.8	15.7911	1465.81	25.6485	1465.81	25.6485
SR13-Spot 42	120.106	149114	0.591663	10.8456	1.08064	3.16118	1.65426	0.248658	1.25251	0.757145	0.97282	1431.55	16.079	1447.73	12.7611	1471.55	20.5109	1471.55	20.5109
SR13-Spot 294	40.7052	105658	0.465543	10.8397	1.25877	3.18225	1.80551	0.250179	1.29436	0.716893	0.977463	1439.4	16.6976	1452.86	13.9503	1472.59	23.8889	1472.59	23.8889
SR13-Spot 286	146.814	207495	0.529469	10.8361	1.13901	3.18192	1.79268	0.250069	1.38432	0.772211	0.976655	1438.83	17.8519	1452.78	13.8507	1473.23	21.614	1473.23	21.614
SR13-Spot 296	100.248	218210	0.261811	10.8237	1.56886	2.99333	2.03339	0.234979	1.29359	0.636171	0.922155	1360.54	15.8666	1405.93	15.4776	1475.39	29.7632	1475.39	29.7632
SR13-Spot 155	117.545	27829	0.25181	10.8107	2.54559	3.09316	2.85498	0.242524	1.29264	0.452766	0.9473	1399.8	16.2647	1431	21.9101	1477.68	48.2813	1477.68	48.2813
SR13-Spot 117	423.684	74807.1	0.126053	10.7836	1.00886	3.28124	1.96413	0.256625	1.68523	0.858003	0.993333	1472.55	22.1857	1476.61	15.2862	1482.44	19.1206	1482.44	19.1206
SR13-Spot 173	68.3719	165465	0.475319	10.7824	1.06381	3.18585	1.91494	0.249136	1.59226	0.831493	0.9672	1434.02	20.472	1453.73	14.7998	1482.65	20.1616	1482.65	20.1616
SR13-Spot 174	80.9041	226203	0.497166	10.7772	1.36426	3.25537	2.15945	0.254451	1.67392	0.775163	0.985053	1461.39	21.888	1470.46	16.7755	1483.56	25.8529	1483.56	25.8529
SR13-Spot 297	146.706	234390	0.603968	10.7762	1.21563	3.23102	1.59094	0.252524	1.02632	0.645102	0.978259	1451.48	13.3388	1464.63	12.3367	1483.74	23.0357	1483.74	23.0357
SR13-Spot 154	128.355	80424.4	0.316031	10.5108	1.09479	3.53286	1.91363	0.269315	1.56952	0.820181	1.00424	1537.32	21.4673	1534.6	15.1452	1530.84	20.6146	1530.84	20.6146
SR13-Spot 252	170.921	168710	0.411552	10.4225	1.13441	3.78866	1.92541	0.286388	1.55573	0.808	1.04962	1623.45	22.3273	1590.34	15.4688	1546.71	21.3176	1546.71	21.3176
SR13-Spot 14	791.07	66504.5	0.226503	10.391	1.00506	3.41409	1.73473	0.257295	1.41391	0.815061	0.950785	1475.99	18.6524	1507.64	13.6245	1552.39	18.8726	1552.39	18.8726
SR13-Spot 202	250.806	66056.1	0.294233	10.3776	1.388	3.80459	2.07111	0.286353	1.5372	0.742208	1.04403	1623.28	22.0593	1593.72	16.6542	1554.82	26.0538	1554.82	26.0538
SR13-Spot 152	549.641	148211	0.15519	10.2326	0.890783	3.56569	1.85244	0.264622	1.62421	0.876792	0.957162	1513.45	21.9092	1541.93	14.6907	1581.18	16.6621	1581.18	16.6621
SR13-Spot 229	154.879	112791	0.272424	10.1615	0.77413	3.91329	1.5322	0.288402	1.32226	0.862979	1.02467	1633.54	19.0802	1616.43	12.3919	1594.2	14.4568	1594.2	14.4568
SR13-Spot 250	315.83	77110.1	0.274822	10.101	1.00554	3.87441	2.07257	0.283836	1.8123	0.874421	1.0033	1610.65	25.8291	1608.37	16.7287	1605.35	18.7498	1605.35	18.7498
SR13-Spot 130	115.004	80535.5	0.357279	10.0533	0.91778	4.09292	1.74524	0.298428	1.48444	0.850562	1.04295	1683.51	21.994	1652.89	14.2423	1614.18	17.0936	1614.18	17.0936
SR13-Spot 5	306.502	210592	0.222573	10.0422	1.02218	3.98073	1.64499	0.289927	1.28885	0.783502	1.01543	1641.17	18.6744	1630.27	13.3502	1616.23	19.0332	1616.23	19.0332
SR13-Spot 153	149.867	93292.4	0.883741	10.0212	1.11322	3.9953	1.66864	0.290382	1.24302	0.744929	1.01439	1643.44	18.0322	1633.24	13.5521	1620.12	20.7183	1620.12	20.7183
SR13-Spot 289	366.189	171098	0.370063	10.0129	0.843497	3.86277	1.07129	0.280515	0.660441	0.61649	0.982906	1593.95	9.32661	1605.94	8.641	1621.67	15.6947	1621.67	15.6947
SR13-Spot 15	78.1051	149711	0.320366	9.97138	1.02655	4.00936	1.62537	0.289954	1.26016	0.775309	1.00731	1641.3	18.26	1636.09	13.2099	1629.39	19.0823	1629.39	19.0823
SR13-Spot 247	166.828	95755.2	0.368518	9.9674	1.0334	4.14244	1.9519	0.299459	1.6559	0.848353	1.03588	1688.63	24.5997	1662.72	15.9665	1630.14	19.2077	1630.14	19.2077
SR13-Spot 197	411.645	307934	0.116171	9.96555	0.969542	4.04674	1.59348	0.292486	1.26458	0.793597	1.01439	1653.94	18.4478	1643.64	12.9746	1630.48	18.0198	1630.48	18.0198
SR13-Spot 28	62.0203	53814.2	0.431692	9.96422	1.04858	4.05235	1.74537	0.292853	1.39527	0.799414	1.01535	1655.77	20.3741	1644.77	14.2154	1630.73	19.4885	1630.73	19.4885
SR13-Spot 231	960.1	95641.9	0.23605	9.94784	1.33851	3.30904	2.33348	0.238743	1.91142	0.819127	0.844759	1380.16	23.7479	1483.19	18.1971	1633.79	24.868	1633.79	24.868
SR13-Spot 103	87.3954	92478.7	0.384063	9.9443	1.2238	4.00321	1.93815	0.288723	1.50291	0.775435	1.00043	1635.15	21.7058	1634.85	15.7475	1634.45	22.7346	1634.45	22.7346
SR13-Spot 198	517.136	244641	0.0394128	9.94275	0.951907	3.94834	1.86997	0.284721	1.60955	0.860737	0.987984	1615.09	22.9951	1623.65	15.1513	1634.74	17.6823	1634.74	17.6823
SR13-Spot 161	129.675	79487.7	0.457512	9.94014	1.19773	4.12901	1.7502	0.297672	1.27618	0.729165	1.02723	1679.75	18.8714	1660.06	14.3073	1635.23	22.2479	1635.23	22.2479
SR13-Spot 243	69.7742	96754.5	0.495271	9.92331	1.17253	4.04113	2.12473	0.290843	1.77191	0.833944	1.0045	1645.74	25.7363	1642.51	17.2962	1638.37	21.7711	1638.37	21.7711
SR13-Spot 163	220.074	70906.5	0.485262	9.92044	1.10103	4.12881	1.76065	0.297067	1.3739	0.780339	1.02309	1676.75	20.2846	1660.02	14.3926	1638.91	20.4419	1638.91	20.4419
SR13-Spot 299	197.986	488203	0.279028	9.91404	1.00409	3.99693	1.79583	0.287393	1.4889	0.829085	0.992915	1628.49	21.4264	1633.57	14.5864	1640.11	18.6406	1640.11	18.6406
SR13-Spot 288	293.384	161553	0.244745	9.91057	1.05329	3.30261	1.57059	0.237385	1.16505	0.741787	0.836864	1373.09	14.4082	1481.67	12.2416	1640.76	19.5525	1640.76	19.5525
SR13-Spot 83	387.346	138205	0.0893138	9.90291	1.03264	3.62154	1.68721	0.260109	1.33429	0.790826	0.907566	1490.4	17.7548	1554.28	13.4255	1642.19	19.1655	1642.19	19.1655
SR13-Spot 59	155.995	165687	0.203753	9.90276	1.00176	4.08296	2.37108	0.293245	2.14907	0.906367	1.00944	1657.72	31.4138	1650.91	19.3413	1642.22	18.5922	1642.22	18.5922
SR13-Spot 141	424.26	56412.2	0.204694	9.9024	0.919914	4.13216	1.72145	0.296768	1.45504	0.845243	1.02008	1675.26	21.466	1660.69	14.0744	1642.29	17.073	1642.29	17.073
SR13-Spot 315	196.449	289842	0.311381	9.90209	0.964122	3.97975	1.61626	0.285813	1.29721	0.802602	0.986741	1620.57	18.5881	1630.08	13.1164	1642.35	17.8934	1642.35	17.8934
SR13-Spot 219	644.634	131816	0.10521	9.90152	0.772702	3.93603	1.76539	0.282657	1.58731	0.899124	0.977031	1604.73	22.5491	1621.12	14.2949	1642.45	14.3405	1642.45	14.3405
SR13-Spot 57	139.708	131357	0.408037	9.90075	1.20962	3.94715	1.97697	0.283433	1.56372	0.790969	0.979319	1608.63	22.2616	1623.41	16.0175	1642.6	22.446	1642.6	22.446
SR13-Spot 32	179.003	225357	0.213143	9.89978	1.50107	4.09213	2.28364	0.293814	1.72098	0.753615	1.01083	1660.56	25.1941	1652.73	18.6362	1642.78	27.8549	1642.78	27.8549
SR13-Spot 169	131.374	72843.6	0.319815	9.86917	1.1793	4.06048	1.6678	0.290641	1.17931	0.707109	0.997698	1644.73	17.1198	1646.4	13.5889	1648.53	21.8683	1648.53	21.8683
SR13-Spot 301	99.6512	1.29092e+06	0.363178	9.86676	0.945335	4.17485	1.6166	0.298754	1.31138	0.8112	1.02192	1685.13	19.4463	1669.1	13.2434	1648.98	17.5281	1648.98	17.5281
SR13-Spot 145	249.813	216432	0.422226	9.8628	0.847008	4.01367	1.75848	0.287105	1.54105	0.876353	0.986255	1627.04	22.1597	1636.97	14.2949	1649.72	15.7032	1649.72	15.7032
SR13-Spot 52	694.732	104456	0.0707884	9.85344	1.16222	3.86817	1.88021	0.276434	1.47798	0.786074	0.952708	1573.38	20.634	1607.06	15.1708	1651.48	21.5432	1651.48	21.5432
SR13-Spot 93	455.544	71342.4	0.563937	9.85297	0.796662	4.0403	1.2979	0.288722	1.02463	0.789455	0.99005	1635.14	14.7982	1642.35	10.5644	1651.57	14.7662	1651.57	14.7662
SR13-Spot 194	186.933	86030.7	0.561263	9.84668	0.967002	4.14201	1.94481	0.295801	1.68736	0.867624	1.01071	1670.45	24.8308	1662.63	15.9082	1652.75	17.9213	1652.75	17.9213
SR13-Spot 122	127.774	192508	0.530979	9.84291	0.868933	4.05251	1.54682	0.289299	1.27969	0.827303	0.990662	1638.02	18.5104	1644.8	12.5982	1653.46	16.102	1653.46	16.102
SR13-Spot 232	105.801	170966	0.635084	9.83706	1.25416	4.07945	1.96441	0.291049	1.51194	0.769668	0.995286	1646.77	21.9724	1650.2	16.0207	1654.57	23.2387	1654.57	23.2387
SR13-Spot 226	248.564	153425	0.108757	9.83698	0.977848	3.92109	1.72676	0.279748	1.4232	0.824205	0.961026	1590.09	20.0553	1618.04	13.9712	1654.58	18.1181	1654.58	18.1181
SR13-Spot 24	104.094	74152.7	0.526972	9.82974	1.25548	4.11416	2.02556	0.293307	1.58955	0.784745	1.00126	1658.03	23.2389	1657.12	16.5471	1655.95	23.259	1655.95	23.259
SR13-Spot 79	87.1741	44182.4	0.455641	9.81944	1.22336	4.0638	1.93028	0.289413	1.49311	0.773519	0.988364	1638.6	21.6042	1647.07	15.7304	1657.89	22.6581	1657.89	22.6581
SR13-Spot 81	86.3886	48259.9	0.464314	9.81231	1.06567	4.07657	1.79522	0.290111	1.4447	0.804749	0.989666	1642.09	20.9428	1649.63	14.6387	1659.23	19.7337	1659.23	19.7337
SR13-Spot 258	335.28	217834	0.162316	9.80681	1.17147	4.179	1.83083	0.297234	1.40698	0.768495	1.01043	1677.58	20.7821	1669.91	15.0015	1660.27	21.6903	1660.27	21.6903
SR13-Spot 56	457.826	1.03189e+06	0.248715	9.80346	1.13678	3.8819	2.02676	0.276009	1.67794	0.827892	0.946009	1571.23	23.3972	1609.93	16.3653	1660.9	21.0463	1660.9	21.0463
SR13-Spot 70	100.087	275170	0.470225	9.80059	1.22063	3.93712	2.27191	0.279853	1.91615	0.843409	0.957373	1590.62	27.0097	1621.35	18.3981	1661.44	22.5974	1661.44	22.5974
SR13-Spot 139	132.789	268298	0.471045	9.79922	0.98817	4.04094	1.57736	0.287192	1.22947	0.779445	0.979405	1627.48	17.6834	1642.48	12.8397	1661.7	18.2927	1661.7	18.2927
SR13-Spot 227	129.83	215516	0.353976	9.79656	1.09011	4.28366	1.6407	0.30436	1.2262	0.747362	1.03049	1712.89	18.4446	1690.23	13.5072	1662.21	20.1787	1662.21	20.1787
SR13-Spot 298	442.488	85909.9	0.287181	9.79212	0.994532	3.94892	1.58404	0.280449	1.23292	0.778339	0.958257	1593.62	17.4079	1623.77	12.8348	1663.04	18.4073	1663.04	18.4073
SR13-Spot 274	74.3311	132415	0.332046	9.78813	1.31844	4.03951	1.97684	0.286765	1.47296	0.74511	0.976889	1625.34	21.1612	1642.19	16.0908	1663.8	24.401	1663.8	24.401
SR13-Spot 182	96.0923	52397.9	0.421024	9.78578	1.03888	4.13785	1.45701	0.293677	1.02158	0.701143	0.997377	1659.88	14.9497	1661.81	11.9154	1664.24	19.2253	1664.24	19.2253
SR13-Spot 104	371.562	98101.9	0.253401	9.7835	0.945509	4.10949	1.74637	0.291595	1.46827	0.840757	0.990883	1649.5	21.3688	1656.19	14.2628	1664.67	17.4962	1664.67	17.4962
SR13-Spot 109	95.3184	74614.8	0.307636	9.77439	1.05598	4.15336	1.83868	0.294434	1.5052	0.818634	0.998352	1663.65	22.0711	1664.87	15.0479	1666.4	19.5365	1666.4	19.5365
SR13-Spot 74	125.358	154016	0.269478	9.76467	1.04401	4.24668	1.69077	0.30075	1.32994	0.78659	1.01606	1695.03	19.8227	1683.09	13.8965	1668.24	19.3104	1668.24	19.3104
SR13-Spot 290	84.5862	149598	0.492496	9.76408	1.08023	3.95904	1.77199	0.280362	1.40466	0.792701	0.954948	1593.19	19.828	1625.84	14.3653	1668.35	19.9801	1668.35	19.9801
SR13-Spot 132	100.202	51812.7	0.496712	9.75752	0.947335	4.06264	1.54823	0.287506	1.22458	0.79095	0.97572	1629.05	17.628	1646.84	12.616	1669.59	17.519	1669.59	17.519
SR13-Spot 55	71.5419	233693	0.273507	9.7498	1.33488	4.19236	2.01666	0.296451	1.51162	0.749569	1.00158	1673.69	22.2823	1672.53	16.5346	1671.05	24.6824	1671.05	24.6824
SR13-Spot 54	124.233	59552.6	0.411503	9.74673	1.13118	4.26684	1.53036	0.301622	1.03073	0.673526	1.01658	1699.35	15.3973	1686.99	12.5893	1671.64	20.914	1671.64	20.914
SR13-Spot 127	817.119	82835.4	0.227719	9.74595	1.00701	3.811	1.3674	0.269378	0.925044	0.676501	0.919761	1537.64	12.6547	1595.07	10.9988	1671.79	18.6175	1671.79	18.6175
SR13-Spot 9	317.378	176799	0.499295	9.72729	0.75167	4.27174	1.50554	0.301367	1.30448	0.866448	1.01358	1698.08	19.4738	1687.93	12.3878	1675.33	13.89	1675.33	13.89
SR13-Spot 142	136.333	122400	0.416255	9.72556	1.3683	4.05747	2.11293	0.286199	1.61004	0.761995	0.968281	1622.51	23.095	1645.8	17.2139	1675.66	25.2857	1675.66	25.2857
SR13-Spot 119	294.326	59063.9	0.119531	9.67584	1.02061	4.11831	1.81098	0.289006	1.496	0.82607	0.971182	1636.56	21.6223	1657.94	14.7968	1685.12	18.837	1685.12	18.837
SR13-Spot 185	527.823	881051	0.227336	9.66246	0.887129	4.31503	1.64014	0.302392	1.37952	0.841096	1.00917	1703.16	20.6479	1696.24	13.5212	1687.68	16.3677	1687.68	16.3677
SR13-Spot 2	531.597	236542	0.373859	9.58875	0.734555	4.29212	1.68674	0.298492	1.51839	0.900194	0.989443	1683.83	22.5008	1691.85	13.8914	1701.79	13.5282	1701.79	13.5282
SR13-Spot 11	67.8253	53339.2	0.451441	9.56877	1.36527	4.10953	2.04898	0.285199	1.52786	0.74567	0.948323	1617.49	21.8565	1656.2	16.7347	1705.63	25.1341	1705.63	25.1341
SR13-Spot 282	111.03	190819	0.228351	9.56539	1.25424	4.2756	1.83483	0.296619	1.33922	0.729884	0.981385	1674.52	19.7495	1688.68	15.1002	1706.28	23.0878	1706.28	23.0878
SR13-Spot 272	338.149	159632	0.326081	9.54934	1.03682	4.24042	1.52734	0.293684	1.12151	0.734288	0.971067	1659.91	16.4125	1681.88	12.5496	1709.37	19.0776	1709.37	19.0776
SR13-Spot 131	99.3019	106083	0.208018	9.51899	1.01376	4.4122	1.64295	0.30461	1.2929	0.786938	0.99936	1714.13	19.4603	1714.63	13.6007	1715.23	18.6395	1715.23	18.6395
SR13-Spot 84	256.777	228418	0.364335	9.49046	1.12417	4.38813	2.17893	0.302041	1.86655	0.856633	0.988769	1701.42	27.9126	1710.11	18.0202	1720.75	20.6555	1720.75	20.6555
SR13-Spot 12	273.942	2.34473e+06	0.255023	9.48008	0.951976	4.40192	1.49047	0.302659	1.14685	0.76945	0.98939	1704.48	17.177	1712.7	12.333	1722.76	17.4886	1722.76	17.4886
SR13-Spot 237	173.764	102351	0.257634	9.46666	0.948066	4.39301	1.75686	0.301618	1.47909	0.841897	0.984913	1699.33	22.0947	1711.03	14.532	1725.36	17.4093	1725.36	17.4093
SR13-Spot 313	238.355	98670.2	0.210004	9.45263	1.12419	4.46695	1.91188	0.30624	1.54645	0.808861	0.996585	1722.18	23.3719	1724.85	15.8633	1728.08	20.6369	1728.08	20.6369
SR13-Spot 71	99.1058	77866.2	0.205852	9.39742	1.20967	4.37037	1.81017	0.297869	1.34663	0.743926	0.96659	1680.73	19.9234	1706.75	14.9587	1738.83	22.1764	1738.83	22.1764
SR13-Spot 44	152.962	52039.4	0.394939	9.35192	1.1578	4.50435	1.67411	0.305514	1.2092	0.722292	0.983335	1718.59	18.2418	1731.77	13.9113	1747.72	21.2018	1747.72	21.2018
SR13-Spot 305	338.061	265225	0.309709	9.23881	0.945415	4.67317	1.77967	0.313131	1.50779	0.847228	0.992161	1756.1	23.1781	1762.45	14.8863	1769.97	17.2643	1769.97	17.2643
SR13-Spot 228	94.2272	89522.4	0.37711	9.15949	1.10023	4.64418	1.95744	0.308517	1.61897	0.827084	0.970715	1733.41	24.607	1757.25	16.3555	1785.7	20.0529	1785.7	20.0529
SR13-Spot 188	221.011	88719.2	0.284634	9.14286	0.941377	4.62081	1.80438	0.306407	1.53935	0.853118	0.963104	1723	23.2743	1753.03	15.0629	1789.01	17.1501	1789.01	17.1501
SR13-Spot 34	37.4272	39853.6	1.45441	9.14236	1.24959	4.68395	1.84678	0.310577	1.35982	0.736319	0.974534	1743.55	20.7734	1764.38	15.454	1789.11	22.7659	1789.11	22.7659
SR13-Spot 4	558.006	73933.4	0.278366	8.80539	0.948478	5.09547	1.77686	0.32541	1.50253	0.845613	0.977847	1816.1	23.7807	1835.35	15.0831	1857.24	17.1362	1857.24	17.1362
SR13-Spot 41	40.8493	89314.8	0.899258	8.67249	1.07241	5.26799	1.81863	0.33135	1.46879	0.807636	0.978909	1844.92	23.5654	1863.69	15.5212	1884.67	19.3118	1884.67	19.3118
SR13-Spot 38	101.758	94243.4	0.484274	7.95095	1.12948	6.50919	1.86219	0.375357	1.48055	0.79506	1.0073	2054.56	26.048	2047.14	16.3918	2039.66	19.9732	2039.66	19.9732
SR16-Spot 61	277.358	31455.4	1.07868	20.5075	1.81407	0.0762479	3.19463	0.0113407	2.62961	0.823133	0.974323	72.6954	1.90087	74.6112	2.29809	136.41	42.604	72.6954	1.14052
SR16-Spot 59	155.353	21917.1	0.60931	20.128	1.41831	0.209628	2.98015	0.0306018	2.62101	0.879489	1.00556	194.314	5.017	193.24	5.24408	180.124	33.0638	194.314	3.0102
SR16-Spot 239	192.841	20218.1	0.912761	18.4396	1.24978	0.232635	2.76202	0.0311119	2.46309	0.891771	0.92999	197.504	4.79092	212.372	5.29299	380.632	28.0982	197.504	2.87455
SR16-Spot 112	636.851	75181.6	1.00081	19.7729	1.11383	0.220763	2.39266	0.0316589	2.1176	0.885039	0.99199	200.922	4.18911	202.545	4.39349	221.451	25.7536	200.922	2.51347
SR16-Spot 109	81.8177	10980.1	0.932027	20.302	1.68205	0.215069	3.22592	0.0316676	2.75268	0.853301	1.01607	200.977	5.44689	197.797	5.79781	160.023	39.3582	200.977	3.26813
SR16-Spot 273	494.262	45912.4	0.710274	19.2767	0.93127	0.227819	2.67214	0.0318509	2.50461	0.937305	0.969893	202.122	4.98383	208.397	5.0344	279.968	21.3379	202.122	2.9903
SR16-Spot 304	599.184	25098.4	1.91609	19.9486	0.851615	0.221973	2.29974	0.0321154	2.13625	0.928909	1.0011	203.774	4.28504	203.551	4.24181	200.954	19.7764	203.774	2.57103
SR16-Spot 63	356.3	51158.7	1.40994	19.2205	1.08939	0.279842	2.48804	0.0390101	2.23686	0.899047	0.98468	246.694	5.41396	250.532	5.52393	286.641	24.9137	246.694	3.24838
SR16-Spot 119	452.341	72653.6	0.423532	19.5186	1.00801	0.312134	2.72351	0.0441864	2.5301	0.928986	1.0105	278.73	6.90186	275.834	6.57851	251.314	23.1801	278.73	4.14111
SR16-Spot 250	460.519	56786.2	0.988243	18.1465	0.953077	0.343749	2.70599	0.0452411	2.5326	0.935921	0.950768	285.238	7.06645	300.008	7.02888	416.543	21.2938	285.238	4.23987
SR16-Spot 172	184.21	102795	2.68487	17.7568	1.32547	0.368097	2.84639	0.0474052	2.51894	0.88496	0.93819	298.572	7.34934	318.242	7.77639	464.865	29.3759	298.572	4.4096
SR16-Spot 57	669.355	33064	0.736669	17.4166	1.31399	0.38284	3.04761	0.0483594	2.74979	0.902278	0.924999	304.441	8.17689	329.126	8.56733	507.543	28.914	304.441	4.90614
SR16-Spot 60	564.77	116908	0.564647	18.3929	0.908293	0.382278	3.02588	0.0509951	2.88633	0.953884	0.975403	320.628	9.02802	328.713	8.49719	386.338	20.4008	320.628	5.41681
SR16-Spot 78	214.671	16696.9	0.998367	14.5558	2.15848	0.483911	6.32185	0.0510857	5.94194	0.939907	0.801451	321.183	18.617	400.752	20.936	889.763	44.5923	321.183	11.1702
SR16-Spot 164	550.331	71141.8	0.307185	18.6167	0.999175	0.390769	2.35897	0.0527621	2.13691	0.905866	0.989628	331.457	6.90393	334.931	6.73013	359.103	22.5464	331.457	4.14236
SR16-Spot 103	695.684	37154.1	0.334813	18.1176	0.858636	0.403144	2.40814	0.0529736	2.24986	0.934274	0.967512	332.752	7.29653	343.926	7.02548	420.104	19.1712	332.752	4.37792
SR16-Spot 19	172.799	21294.5	0.576343	17.5752	1.436	0.431609	3.15284	0.0550159	2.80683	0.890255	0.947641	345.243	9.43548	364.318	9.65185	487.624	31.6738	345.243	5.66129
SR16-Spot 247	322.481	58782.6	0.929385	18.2222	1.1175	0.419019	2.58276	0.0553775	2.32848	0.901549	0.977775	347.452	7.8762	355.35	7.74405	407.243	25.0082	347.452	4.72572
SR16-Spot 153	765.372	54094.8	0.428469	17.7851	0.89969	0.432867	2.28108	0.0558353	2.09616	0.918933	0.959032	350.248	7.14587	365.21	6.99722	461.317	19.9456	350.248	4.28752
SR16-Spot 277	211.253	61248.5	1.76589	18.3654	1.04775	0.434843	2.31704	0.0579204	2.06661	0.89192	0.990062	362.966	7.29384	366.61	7.13014	389.695	23.5187	362.966	4.3763
SR16-Spot 90	736.622	215808	1.11491	18.158	0.81816	0.45032	2.09078	0.0593044	1.92405	0.920255	0.983817	371.394	6.94386	377.503	6.59176	415.134	18.2837	371.394	4.16632
SR16-Spot 32	507.742	49739.7	0.709756	16.8617	1.56318	0.491515	4.24631	0.0601088	3.94812	0.929776	0.926947	376.287	14.431	405.942	14.2095	578.322	33.9696	376.287	8.6586
SR16-Spot 244	333.716	87930.8	0.720956	18.1287	1.11548	0.469838	2.78935	0.061775	2.5566	0.916556	0.98807	386.411	9.58872	391.077	9.05363	418.743	24.9129	386.411	5.75323
SR16-Spot 130	311.048	89741.8	0.336757	18.4	0.877674	0.464129	3.93772	0.0619377	3.83867	0.974844	1.00071	387.399	14.433	387.126	12.6753	385.47	19.7162	387.399	8.65978
SR16-Spot 243	687.191	81932.6	0.674624	18.0991	0.929855	0.474411	3.00221	0.0622747	2.85458	0.950827	0.987857	389.444	10.7879	394.231	9.80891	422.382	20.7539	389.444	6.47272
SR16-Spot 114	624.541	48734	0.555128	17.5233	1.04505	0.496157	2.69788	0.063057	2.48725	0.921928	0.963559	394.19	9.51074	409.098	9.0846	494.124	23.0165	394.19	5.70645
SR16-Spot 228	310.137	25209	1.64711	17.9571	1.005	0.486111	2.9571	0.0633099	2.78108	0.940476	0.983758	395.723	10.6744	402.257	9.82187	439.934	22.3837	395.723	6.40465
SR16-Spot 183	397.167	562965	0.241327	18.1652	1.00874	0.482061	2.36941	0.0635099	2.14396	0.904848	0.993616	396.936	8.25343	399.486	7.82556	414.245	22.5457	396.936	4.95206
SR16-Spot 263	280.644	69327.7	0.756242	17.75	1.15482	0.493809	2.62051	0.0635705	2.35233	0.897662	0.97497	397.303	9.0637	407.503	8.79609	465.701	25.5817	397.303	5.43822
SR16-Spot 143	257.414	42172.4	1.08489	18.1888	1.24875	0.482083	3.67901	0.0635951	3.4606	0.940633	0.994871	397.452	13.3388	399.501	12.1515	411.349	27.9244	397.452	8.0033
SR16-Spot 240	140.614	94373.7	0.627457	17.6436	1.43879	0.505249	3.12113	0.0646532	2.76971	0.887408	0.84313	403.862	10.8426	415.249	10.6379	479.004	31.8136	403.862	10.8426
SR16-Spot 113	396.64	91021.3	0.44607	17.5803	1.02537	0.510407	3.20608	0.0650791	3.03769	0.947478	0.834652	406.44	11.9652	418.723	11.0013	486.958	22.6095	406.44	11.9652
SR16-Spot 186	675.549	86769.6	0.538774	17.6806	0.767965	0.512722	1.97648	0.0657474	1.82118	0.921426	0.865277	410.484	7.24261	420.278	6.80222	474.396	16.9655	410.484	7.24261
SR16-Spot 56	215.735	19995.1	0.861457	17.8907	1.60807	0.511611	9.8729	0.0663843	9.74106	0.986646	0.924487	414.335	39.0914	419.532	33.9419	448.179	35.752	414.335	39.0914
SR16-Spot 312	172.189	69922.4	0.49681	17.4761	1.05547	0.52512	3.327	0.0665581	3.15514	0.948344	0.830624	415.386	12.6927	428.566	11.6321	500.088	23.2341	415.386	12.6927
SR16-Spot 141	185.169	20353.8	0.456267	17.687	1.05316	0.522379	2.74696	0.0670098	2.53706	0.923587	0.882866	418.116	10.2712	426.739	9.57103	473.589	23.305	418.116	10.2712
SR16-Spot 105	592.902	1.60109e+06	0.333296	17.8526	0.988581	0.517921	2.44119	0.0670601	2.23206	0.914335	0.923852	418.419	9.04275	423.761	8.45776	452.907	21.952	418.419	9.04275
SR16-Spot 49	266.939	35801.7	1.09608	18.0006	0.847708	0.515944	2.28996	0.0673579	2.12728	0.928958	0.967007	420.218	8.65408	422.438	7.91382	434.555	18.8791	420.218	8.65408
SR16-Spot 122	196.628	284117	0.473583	17.9443	1.0193	0.519204	2.57169	0.0675714	2.36107	0.918098	0.954655	421.508	9.63369	424.62	8.92447	441.529	22.6738	421.508	9.63369
SR16-Spot 31	380.495	86070.9	0.520162	17.7682	1.13105	0.5245	3.08921	0.0675909	2.8747	0.930564	0.909733	421.625	11.7326	428.153	10.7922	463.461	25.0718	421.625	11.7326
SR16-Spot 233	429.573	3.04935e+06	0.927658	17.7426	1.15374	0.525807	2.54622	0.0676616	2.26982	0.891449	0.904492	422.052	9.27297	429.023	8.9097	466.618	25.5727	422.052	9.27297
SR16-Spot 222	249.021	68191.6	0.403958	17.6986	0.961489	0.528716	2.39427	0.0678674	2.19273	0.915825	0.896572	423.294	8.98356	430.957	8.40832	472.126	21.2756	423.294	8.98356
SR16-Spot 299	235.192	38834.2	0.926715	17.5193	1.11966	0.536732	2.27225	0.0681983	1.97725	0.87017	0.859839	425.292	8.13769	436.267	8.05852	494.618	24.6802	425.292	8.13769
SR16-Spot 224	75.1969	85395.4	0.336352	17.4297	1.46957	0.545988	4.01395	0.0690195	3.73526	0.93057	0.850472	430.246	15.5463	442.365	14.3949	505.891	32.3239	430.246	15.5463
SR16-Spot 242	715.776	1.70772e+06	0.111588	17.8571	1.04818	0.539921	3.06755	0.0699261	2.88292	0.93981	0.963207	435.711	12.1461	438.372	10.9212	452.354	23.2945	435.711	12.1461
SR16-Spot 74	225.896	113770	1.03951	17.6601	0.940894	0.546078	2.63948	0.0699433	2.46608	0.934307	0.913767	435.814	10.3923	442.424	9.46637	476.942	20.8159	435.814	10.3923
SR16-Spot 135	446.085	38318.5	1.59952	17.5513	0.841224	0.552871	2.07328	0.0703771	1.89495	0.913986	0.893672	438.427	8.03174	446.876	7.4952	490.591	18.5393	438.427	8.03174
SR16-Spot 47	293.959	43582.1	0.917142	17.4732	1.09942	0.567386	2.91267	0.0719035	2.69721	0.926026	0.89443	447.614	11.6635	456.323	10.7063	500.445	24.1895	447.614	11.6635
SR16-Spot 187	267.819	85925.2	0.545305	17.2236	0.983472	0.586917	3.14027	0.0733164	2.98229	0.949694	0.85728	456.105	13.1323	468.897	11.7934	532.037	21.5574	456.105	13.1323
SR16-Spot 235	277.863	115310	0.251208	17.2386	0.909272	0.595553	3.61096	0.0744597	3.4946	0.967777	0.873299	462.968	15.6116	474.408	13.6863	530.137	19.9119	462.968	15.6116
SR16-Spot 173	244.674	92226.6	0.439355	17.3723	2.42064	0.608025	5.28433	0.0766085	4.6973	0.888912	0.927304	475.848	21.547	482.314	20.2911	513.152	53.2129	475.848	21.547
SR16-Spot 55	401.725	117770	0.257363	17.0278	1.29545	0.626928	2.95529	0.0774237	2.65623	0.898805	0.86304	480.727	12.3047	494.181	11.5637	557.016	28.2524	480.727	12.3047
SR16-Spot 189	258.737	47233.3	1.11984	16.8608	1.00361	0.699907	3.33053	0.085589	3.17572	0.953518	0.915187	529.397	16.1404	538.736	13.9247	578.457	21.788	529.397	16.1404
SR16-Spot 121	103.17	29979.8	0.358911	16.4401	1.10975	0.72429	4.29303	0.0863608	4.14712	0.966011	0.843391	533.978	21.2524	553.196	18.3123	633.133	23.9138	533.978	21.2524
SR16-Spot 50	350.531	77476.3	0.381917	16.3526	1.08754	0.745908	3.00227	0.088465	2.79837	0.932085	0.847724	546.453	14.6616	565.847	13.0247	644.612	23.3727	546.453	14.6616
SR16-Spot 196	204.547	41014.6	1.04341	16.7378	0.88998	0.728911	2.74266	0.0884856	2.59425	0.945887	0.919625	546.575	13.5951	555.914	11.7415	594.345	19.2883	546.575	13.5951
SR16-Spot 66	253.791	52171.9	0.588965	16.5809	1.12405	0.743342	3.32108	0.0893914	3.12507	0.940981	0.897888	551.937	16.5307	564.354	14.3795	614.706	24.2771	551.937	16.5307
SR16-Spot 110	251.642	76608	0.41827	16.2633	1.13252	0.76055	2.96148	0.0897088	2.73638	0.92399	0.843767	553.815	14.5218	574.327	12.991	656.36	24.2713	553.815	14.5218
SR16-Spot 200	421.986	60251.9	0.390117	16.2106	1.04293	0.796789	2.58034	0.0936789	2.36017	0.914678	0.870299	577.258	13.0321	595.015	11.6191	663.287	22.3434	577.258	13.0321
SR16-Spot 51	127.94	22758.1	2.23131	15.9219	1.49328	0.815227	4.19636	0.0941395	3.92168	0.934543	0.826513	579.972	21.7516	605.382	19.1382	701.71	31.8005	579.972	21.7516
SR16-Spot 41	228.368	192565	0.503556	16.9057	1.14295	0.771637	3.53795	0.0946118	3.34825	0.946381	1.0176	582.754	18.6562	580.702	15.6478	572.675	24.8493	582.754	18.6562
SR16-Spot 102	318.754	204004	1.47446	16.5869	0.948058	0.786883	2.95688	0.0946617	2.80077	0.947205	0.949706	583.048	15.6132	589.402	13.2221	613.925	20.4791	583.048	15.6132
SR16-Spot 282	356.318	185499	0.645372	16.7711	0.986634	0.780434	2.754	0.0949283	2.5712	0.933624	0.9908	584.618	14.3703	585.731	12.2582	590.046	21.3768	584.618	14.3703
SR16-Spot 36	294.916	231297	0.765163	16.5842	1.09729	0.7895	2.60135	0.0949609	2.3586	0.906682	0.952025	584.81	13.1862	590.888	11.6538	614.281	23.7126	584.81	13.1862
SR16-Spot 289	419.259	65076.4	1.06195	16.3195	0.898314	0.808534	2.25955	0.0956985	2.0733	0.917575	0.907864	589.151	11.6734	601.631	10.2574	648.942	19.3119	589.151	11.6734
SR16-Spot 207	244.328	51411.5	1.18872	16.5272	0.984408	0.800569	3.1989	0.0959614	3.04367	0.951473	0.950117	590.698	17.1798	597.15	14.4427	621.71	21.2576	590.698	17.1798
SR16-Spot 290	316.389	5.79839e+06	0.766367	16.8925	1.05553	0.784656	2.56083	0.096133	2.33317	0.9111	1.03018	591.707	13.1909	588.136	11.4328	574.375	22.9582	591.707	13.1909
SR16-Spot 104	217.883	40649.1	0.761789	16.651	0.897011	0.797037	2.60563	0.0962538	2.44636	0.938875	0.978255	592.417	13.8467	595.156	11.735	605.586	19.383	592.417	13.8467
SR16-Spot 80	380.941	185418	1.07944	16.3034	0.940169	0.829482	2.91008	0.0980804	2.75402	0.946374	0.926359	603.15	15.8575	613.325	13.398	651.097	20.1625	603.15	15.8575
SR16-Spot 201	803.826	543776	0.72514	16.8221	0.939258	0.816929	2.85946	0.0996699	2.7008	0.944513	1.04978	612.474	15.7802	606.334	13.0552	583.43	20.393	612.474	15.7802
SR16-Spot 83	118.427	62890.4	0.801068	16.2986	0.956715	0.847464	2.61174	0.100177	2.4302	0.930492	0.944333	615.447	14.2649	623.256	12.1654	651.727	20.5365	615.447	14.2649
SR16-Spot 69	54.0407	11819.6	1.75663	15.6135	1.79688	0.890821	4.2953	0.100876	3.90139	0.908292	0.833647	619.542	23.0457	646.81	20.5505	743.17	37.9874	619.542	23.0457
SR16-Spot 305	282.448	44187.3	1.14822	16.5998	0.959348	0.852307	2.84985	0.102612	2.68352	0.941637	1.02851	629.699	16.099	625.915	13.3156	612.241	20.7329	629.699	16.099
SR16-Spot 278	289.314	52389.5	0.627554	16.5637	0.908889	0.857493	3.25459	0.103012	3.12511	0.960214	1.02445	632.034	18.8144	628.753	15.2568	616.95	19.6224	632.034	18.8144
SR16-Spot 270	332.021	62314.8	0.530728	16.5148	0.921852	0.863846	2.12627	0.103469	1.91604	0.901128	1.01825	634.704	11.5817	632.22	10.0067	623.326	19.9022	634.704	11.5817
SR16-Spot 297	156.07	229923	0.85188	16.4165	0.783701	0.869119	2.19521	0.103481	2.05055	0.934102	0.997718	634.775	12.3961	635.089	10.3649	636.227	16.8663	634.775	12.3961
SR16-Spot 126	275.474	45872.1	0.953223	15.8378	0.972126	0.901669	2.18875	0.103572	1.96102	0.895954	0.891115	635.306	11.8643	652.619	10.5379	712.934	20.6774	635.306	11.8643
SR16-Spot 251	323.724	29112.9	0.612522	16.2274	1.15359	0.899646	2.61998	0.105881	2.35234	0.897849	0.981382	648.783	14.5188	651.539	12.5994	661.092	24.7247	648.783	14.5188
SR16-Spot 301	68.8194	77056.7	1.38535	16.05	1.10234	0.909612	3.08109	0.105884	2.87714	0.933808	0.947663	648.797	17.7583	656.851	14.9031	684.628	23.5444	648.797	17.7583
SR16-Spot 227	110.711	40157.5	1.15416	16.1115	1.02582	0.941247	3.12037	0.109986	2.94693	0.944417	0.994404	672.668	18.8239	673.534	15.3636	676.454	21.9299	672.668	18.8239
SR16-Spot 179	208.522	71358.1	0.680859	16.2694	0.962998	0.954435	2.53251	0.112621	2.34227	0.924882	1.0494	687.949	15.2837	680.409	12.5582	655.564	20.6465	687.949	15.2837
SR16-Spot 237	240.903	57928.8	0.0428692	15.8657	1.34409	0.996206	3.19402	0.114632	2.89745	0.907147	0.986474	699.595	19.2093	701.882	16.1863	709.188	28.5806	699.595	19.2093
SR16-Spot 268	277.997	201275	0.302584	14.7507	1.09703	1.08893	3.08035	0.116497	2.87838	0.934433	0.823883	710.369	19.3608	747.986	16.3059	862.221	22.7634	710.369	19.3608
SR16-Spot 68	166.643	137466	1.16801	15.8076	0.988131	1.02861	3.09178	0.117928	2.92963	0.947553	1.00229	718.626	19.9221	718.233	15.9194	716.984	20.969	718.626	19.9221
SR16-Spot 287	539.193	2.77624e+06	1.23237	15.3653	0.683163	1.13214	2.32031	0.126165	2.21746	0.955674	0.98583	765.952	16.0144	768.774	12.5107	776.962	14.3672	765.952	16.0144
SR16-Spot 124	151.972	32954.2	0.671441	14.0559	2.68818	1.26462	5.6259	0.128919	4.9421	0.878456	0.812924	781.697	36.3822	829.981	31.9102	961.586	54.9251	781.697	36.3822
SR16-Spot 89	275.229	60741	0.565845	15.2259	0.878999	1.22285	2.47383	0.135037	2.3124	0.934745	1.02568	816.538	17.7348	811.076	13.8194	796.096	18.4492	816.538	17.7348
SR16-Spot 101	81.0061	53541.3	0.530341	14.5403	0.910623	1.42385	2.96213	0.150155	2.81868	0.951573	1.01107	901.83	23.7218	898.978	17.67	891.959	18.805	901.83	23.7218
SR16-Spot 211	529.876	69015.8	1.05412	14.1265	0.881811	1.39102	2.08233	0.142517	1.8864	0.905909	0.902835	858.877	15.169	885.13	12.3013	951.312	18.0421	951.312	18.0421
SR16-Spot 40	448.942	158843	0.541188	14.0814	1.00426	1.4482	2.50973	0.147902	2.30005	0.916451	0.928331	889.194	19.1041	909.128	15.0755	957.842	20.5102	957.842	20.5102
SR16-Spot 158	51.5325	17967.5	0.475513	14.0003	1.11926	1.63179	3.73203	0.165692	3.56024	0.953969	1.01926	988.329	32.6225	982.55	23.4998	969.652	22.8506	969.652	22.8506
SR16-Spot 218	294.145	55603.8	0.611334	13.9849	0.992494	1.54001	3.47838	0.1562	3.33378	0.958429	0.962689	935.624	29.0339	946.506	21.417	971.886	20.2344	971.886	20.2344
SR16-Spot 275	303.625	121694	0.469923	13.8324	0.759826	1.65453	2.07037	0.165987	1.9259	0.930221	0.995694	989.961	17.6739	991.287	13.1035	994.242	15.4444	994.242	15.4444
SR16-Spot 131	241.745	62325.1	0.71292	13.8166	1.05046	1.4445	3.25303	0.144749	3.07876	0.946428	0.874479	871.462	25.0958	907.589	19.5209	996.55	21.3411	996.55	21.3411
SR16-Spot 205	126.976	319906	0.438868	13.7814	1.07502	1.74926	3.12648	0.174842	2.93585	0.939027	1.03696	1038.74	28.1658	1026.89	20.2014	1001.71	21.8276	1001.71	21.8276
SR16-Spot 281	100.765	72439.5	1.019	13.5804	0.849354	1.75065	3.71508	0.172428	3.61668	0.973515	0.99418	1025.48	34.289	1027.4	24.0128	1031.48	17.1849	1031.48	17.1849
SR16-Spot 35	381.763	1.37698e+06	0.329486	13.5788	0.84184	1.71128	2.06539	0.168531	1.88603	0.913163	0.973146	1004.01	17.5351	1012.77	13.2374	1031.72	17.0337	1031.72	17.0337
SR16-Spot 260	228.914	95961.9	0.699748	13.5554	1.14562	1.55859	4.32699	0.15323	4.17258	0.964314	0.887801	919.045	35.7401	953.908	26.77	1035.19	23.1606	1035.19	23.1606
SR16-Spot 271	315.596	97756.2	0.15084	13.5463	1.2229	1.64123	3.0722	0.161246	2.81832	0.917362	0.929713	963.697	25.2276	986.185	19.3863	1036.55	24.7187	1036.55	24.7187
SR16-Spot 256	56.7449	29362.6	0.531268	13.5435	1.32549	1.76371	4.03004	0.173244	3.80582	0.944364	0.993239	1029.96	36.2277	1032.21	26.1198	1036.97	26.7874	1036.97	26.7874
SR16-Spot 253	778.833	146878	0.152555	13.4681	0.9471	1.84859	2.56468	0.18057	2.3834	0.929316	1.02081	1070.09	23.5002	1062.93	16.9011	1048.28	19.1127	1048.28	19.1127
SR16-Spot 120	268.222	61018.7	0.550051	13.4565	0.78842	1.77896	2.05981	0.173619	1.90295	0.923846	0.982867	1032.02	18.1475	1037.8	13.3895	1050.01	15.9094	1050.01	15.9094
SR16-Spot 300	436.256	90133.4	0.207809	13.4518	0.863244	1.74921	2.3197	0.170655	2.1531	0.928178	0.96669	1015.72	20.2337	1026.87	14.9875	1050.72	17.4158	1050.72	17.4158
SR16-Spot 214	121.917	35180.7	0.681741	13.4322	1.02151	1.74377	3.4702	0.169878	3.31644	0.955692	0.959938	1011.44	31.0449	1024.86	22.3973	1053.65	20.5968	1053.65	20.5968
SR16-Spot 212	566.625	72367.7	0.524039	13.4034	0.994914	1.66085	3.5147	0.161452	3.37095	0.959099	0.911962	964.841	30.2075	993.701	22.2791	1057.98	20.042	1057.98	20.042
SR16-Spot 96	388.32	91383.7	0.0891653	13.3953	1.02252	1.87158	2.24762	0.181827	2.00156	0.890524	1.01675	1076.95	19.8514	1071.09	14.8755	1059.2	20.5808	1059.2	20.5808
SR16-Spot 65	198.995	76406.2	0.405521	13.3595	1.01733	1.59082	4.97393	0.154139	4.86878	0.97886	0.868069	924.123	41.9178	966.621	31.0205	1064.57	20.4794	1064.57	20.4794
SR16-Spot 137	278.973	649404	0.83963	13.3441	0.736265	1.79261	2.43785	0.173489	2.32401	0.953303	0.966635	1031.31	22.1489	1042.77	15.8909	1066.9	14.7828	1066.9	14.7828
SR16-Spot 293	120.814	50974.2	1.20068	13.3294	0.831082	1.77135	2.5376	0.171243	2.39765	0.944849	0.953091	1018.96	22.5981	1035.01	16.4704	1069.11	16.6925	1069.11	16.6925
SR16-Spot 234	57.8906	61337.1	0.914332	13.3232	1.29082	1.73632	3.86247	0.167779	3.6404	0.942504	0.934417	999.864	33.717	1022.1	24.8912	1070.04	25.9462	1070.04	25.9462
SR16-Spot 29	414.524	520141	0.231979	13.294	0.832096	1.74905	2.12108	0.168639	1.95105	0.919838	0.934997	1004.61	18.1495	1026.81	13.7035	1074.45	16.6907	1074.45	16.6907
SR16-Spot 150	840.436	64582.5	0.202322	13.2934	0.826333	1.74534	3.13945	0.168273	3.02875	0.964739	0.933032	1002.59	28.1225	1025.44	20.2687	1074.55	16.575	1074.55	16.575
SR16-Spot 146	213.837	189809	0.517643	13.2831	0.933819	1.83021	1.97442	0.176319	1.73963	0.881084	0.972801	1046.83	16.8093	1056.35	12.965	1076.1	18.7475	1076.1	18.7475
SR16-Spot 178	252.468	93265.5	0.226146	13.2025	1.30504	1.78145	3.9362	0.17058	3.71356	0.943438	0.932934	1015.3	34.8851	1038.71	25.6036	1088.29	26.1351	1088.29	26.1351
SR16-Spot 185	312.519	73507.5	0.365669	13.1988	1.05315	1.59095	4.20405	0.152296	4.07	0.968114	0.839232	913.82	34.6769	966.669	26.2175	1088.88	21.085	1088.88	21.085
SR16-Spot 52	819.311	52545.2	0.283583	13.1215	0.943902	1.62786	2.66057	0.154917	2.48751	0.934952	0.843597	928.47	21.5097	981.033	16.7363	1100.61	18.8811	1100.61	18.8811
SR16-Spot 259	237.502	63013.9	0.382021	13.0893	1.03422	1.80952	2.56597	0.171782	2.34831	0.915176	0.924357	1021.92	22.1925	1048.9	16.7823	1105.55	20.6579	1105.55	20.6579
SR16-Spot 314	228.446	228059	0.360761	13.0605	0.82927	1.59034	2.55474	0.150643	2.41641	0.945851	0.81499	904.566	20.3938	966.431	15.9274	1109.91	16.5576	1109.91	16.5576
SR16-Spot 203	351.93	92422.4	0.506114	13.0225	0.953133	1.90736	2.7492	0.180146	2.57869	0.937978	0.956983	1067.77	25.3752	1083.66	18.3154	1115.77	19.0241	1115.77	19.0241
SR16-Spot 98	417.7	99549.8	0.555564	13.0139	0.855845	1.76304	2.43578	0.166406	2.28048	0.936239	0.888282	992.28	20.9732	1031.97	15.7826	1117.08	17.0589	1117.08	17.0589
SR16-Spot 223	178.528	60037.2	0.432634	13.0032	0.910507	1.93386	3.34863	0.182379	3.22247	0.962324	0.965353	1079.96	32.0426	1092.87	22.4157	1118.72	18.1723	1118.72	18.1723
SR16-Spot 23	192.692	63867.5	0.551756	13.0007	1.24021	1.85001	3.15621	0.174438	2.90233	0.919563	0.926202	1036.52	27.7894	1063.43	20.8058	1119.1	24.7234	1119.1	24.7234
SR16-Spot 82	604.97	205661	0.163434	12.8886	0.920583	2.07284	2.38779	0.193762	2.20319	0.922692	1.00471	1141.72	23.0528	1139.87	16.3565	1136.37	18.2985	1136.37	18.2985
SR16-Spot 274	449.393	176016	0.441881	12.8234	0.94047	2.15213	2.41278	0.200157	2.22194	0.920905	1.02594	1176.16	23.8883	1165.74	16.7283	1146.43	18.6674	1146.43	18.6674
SR16-Spot 236	257.365	86585.3	0.328721	12.8142	0.887842	1.69681	2.22019	0.157697	2.03494	0.916561	0.822364	943.966	17.8689	1007.33	14.185	1147.87	17.6229	1147.87	17.6229
SR16-Spot 215	222.006	358581	0.0463079	12.8012	0.897066	2.03067	2.31369	0.188533	2.13271	0.921777	0.968326	1113.43	21.8086	1125.84	15.7424	1149.85	17.8039	1149.85	17.8039
SR16-Spot 116	283.386	27440.6	0.641956	12.7979	1.00616	1.71735	3.42793	0.159403	3.27694	0.955954	0.828805	953.458	29.0437	1015.04	22.0011	1150.4	19.9688	1150.4	19.9688
SR16-Spot 123	227.89	56167.6	0.458888	12.7655	0.94333	1.72804	3.13172	0.159989	2.98627	0.953555	0.828037	956.714	26.5513	1019.02	20.1453	1155.4	18.7186	1155.4	18.7186
SR16-Spot 246	246.035	135616	0.334106	12.7006	0.95022	2.06104	3.1091	0.189849	2.96034	0.952152	0.961436	1120.55	30.4494	1135.96	21.2591	1165.5	18.8358	1165.5	18.8358
SR16-Spot 202	382.889	27893.5	0.4084	12.5625	0.891138	2.02825	2.31244	0.184797	2.13383	0.922763	0.920791	1093.13	21.4551	1125.03	15.7277	1187.16	17.6015	1187.16	17.6015
SR16-Spot 147	11.8504	28664.2	0.567071	12.5406	1.33959	2.2418	5.97576	0.203898	5.82368	0.97455	1.00475	1196.23	63.5848	1194.22	41.9838	1190.57	26.4637	1190.57	26.4637
SR16-Spot 20	226.731	234281	0.620454	12.5074	0.978	2.29214	2.64044	0.207924	2.45264	0.928875	1.01835	1217.75	27.2158	1209.87	18.6689	1195.8	19.2916	1195.8	19.2916
SR16-Spot 8	190.257	91420.5	0.543409	12.4747	0.76138	2.20749	2.37224	0.199722	2.24674	0.947095	0.977385	1173.83	24.1112	1183.42	16.5791	1200.99	15.0064	1200.99	15.0064
SR16-Spot 209	342.315	66252.9	0.134532	12.4441	1.05193	2.24466	3.52133	0.202587	3.36054	0.954337	0.986235	1189.21	36.4945	1195.12	24.7402	1205.8	20.7019	1205.8	20.7019
SR16-Spot 266	180.048	80766.4	0.560077	12.4166	0.812127	2.32056	2.31884	0.208976	2.17198	0.936664	1.01091	1223.36	24.2021	1218.6	16.4559	1210.15	15.9821	1210.15	15.9821
SR16-Spot 269	323.525	264684	0.498773	12.3483	0.947032	1.8729	2.80803	0.167733	2.64351	0.941412	0.81866	999.609	24.478	1071.56	18.5898	1221.03	18.62	1221.03	18.62
SR16-Spot 193	305.501	63199.8	0.338569	12.2049	0.845778	2.01875	2.71615	0.178696	2.58111	0.950283	0.85202	1059.85	25.2256	1121.84	18.4454	1243.92	16.5688	1243.92	16.5688
SR16-Spot 34	135.777	4.36074e+06	0.851123	12.1198	0.860268	2.41306	2.7307	0.212111	2.59165	0.94908	0.985999	1240.05	29.236	1246.49	19.6057	1257.66	16.8291	1257.66	16.8291
SR16-Spot 73	69.9513	53093.3	0.378713	11.996	1.1489	2.40056	3.08389	0.208857	2.86189	0.928013	0.956998	1222.72	31.8748	1242.77	22.1085	1277.67	22.3988	1277.67	22.3988
SR16-Spot 140	463.77	268337	0.603111	11.9613	0.73266	2.63636	2.60839	0.228709	2.50338	0.959741	1.03461	1327.73	30.0388	1310.84	19.204	1283.31	14.2534	1283.31	14.2534
SR16-Spot 298	483.375	97425	1.12859	11.8763	0.792031	2.15686	2.91124	0.185782	2.80143	0.96228	0.846823	1098.49	28.2943	1167.26	20.1991	1297.18	15.3986	1297.18	15.3986
SR16-Spot 262	258.935	78393.5	0.273522	11.8297	0.820585	2.60247	2.31921	0.223285	2.16919	0.935313	0.995699	1299.21	25.5241	1301.34	17.0136	1304.82	15.937	1304.82	15.937
SR16-Spot 125	437.422	135390	0.296408	11.7634	0.956259	2.68467	2.98086	0.229047	2.82331	0.947147	1.01047	1329.5	33.9185	1324.24	22.0563	1315.73	18.5429	1315.73	18.5429
SR16-Spot 151	129.055	56055.2	0.585275	11.5535	0.791531	2.92163	3.03969	0.244814	2.93483	0.965501	1.04525	1411.68	37.2081	1387.53	22.9981	1350.57	15.2733	1350.57	15.2733
SR16-Spot 177	422.054	423350	0.0350072	11.5284	0.864623	2.83514	2.82796	0.237051	2.69254	0.952115	1.01225	1371.35	33.2613	1364.88	21.2305	1354.76	16.6756	1354.76	16.6756
SR16-Spot 139	158.638	54039.8	0.649622	11.4022	0.826581	2.34529	4.28236	0.193948	4.20183	0.981195	0.830496	1142.73	44.0011	1226.13	30.4935	1375.95	15.8946	1375.95	15.8946
SR16-Spot 156	364.049	88973.9	0.463397	11.3318	0.915107	2.69967	2.76244	0.221876	2.60646	0.943537	0.930779	1291.78	30.5109	1328.37	20.4705	1387.85	17.5669	1387.85	17.5669
SR16-Spot 70	217.514	109243	0.142645	11.3157	0.981739	2.48367	3.75335	0.203833	3.62268	0.965186	0.859985	1195.88	39.5423	1267.29	27.1775	1390.58	18.839	1390.58	18.839
SR16-Spot 92	178.614	86136.9	0.601172	11.3037	0.787889	2.68114	3.10402	0.219805	3.00236	0.967249	0.919734	1280.84	34.8764	1323.27	22.9596	1392.63	15.1148	1392.63	15.1148
SR16-Spot 170	202.157	2.19691e+06	0.494147	11.3035	1.22783	3.0545	2.95258	0.250409	2.68518	0.909433	1.03442	1440.59	34.6652	1421.36	22.5895	1392.66	23.555	1392.66	23.555
SR16-Spot 294	348.247	88568.3	0.439897	11.2182	0.821451	2.94144	2.52004	0.239321	2.3824	0.945381	0.982937	1383.17	29.6574	1392.65	19.0983	1407.18	15.7275	1407.18	15.7275
SR16-Spot 248	267.731	101622	0.561392	11.2102	0.975902	2.9729	2.38318	0.24171	2.1742	0.912312	0.990807	1395.58	27.2831	1400.72	18.1094	1408.53	18.6813	1408.53	18.6813
SR16-Spot 13	309.48	149010	0.581873	11.208	0.794557	2.96424	2.73134	0.240957	2.61322	0.956753	0.987763	1391.67	32.71	1398.5	20.7405	1408.91	15.209	1408.91	15.209
SR16-Spot 276	190.814	85790.4	0.412354	11.2049	0.918704	3.1341	2.34736	0.254695	2.16012	0.92023	1.03775	1462.64	28.267	1441.1	18.0712	1409.44	17.5842	1409.44	17.5842
SR16-Spot 12	211.173	84665.9	0.536958	11.1063	0.761052	3.03176	2.74013	0.244209	2.63232	0.960655	0.987521	1408.54	33.3065	1415.65	20.9248	1426.34	14.5332	1426.34	14.5332
SR16-Spot 217	135.27	45955.3	1.18453	11.0208	0.915534	2.63208	3.06269	0.210382	2.92265	0.954275	0.854115	1230.85	32.748	1309.65	22.5397	1441.09	17.4485	1441.09	17.4485
SR16-Spot 1	178.733	79163.9	0.655089	11.0208	0.934502	2.99526	2.66694	0.239411	2.49786	0.936599	0.960133	1383.64	31.1041	1406.42	20.3044	1441.09	17.81	1441.09	17.81
SR16-Spot 18	179.741	68940.7	0.480005	10.945	0.997065	3.06092	3.17684	0.242977	3.01632	0.949471	0.964194	1402.16	38.0104	1422.97	24.3184	1454.23	18.9687	1454.23	18.9687
[truncated: 340 more rows]
